# Supplementary material for: Back to the Seabed: The Unique Photosystem I Architecture of the Seagrass Posidonia oceanica
Source: Research Square preprint supplement (doi:10.21203/rs.3.rs-8575725/v1), 2026-02-05
Supplement: Supplementary file 1 [file 0268986ef5a078f528b9aef1.pdf]

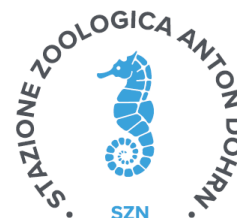

Napoli, 24/06/2024

Preg.mo

**Dott. Antonino Miccio**

A.M.P. Regno di Nettuno

[info@nettunoamp.it](mailto:info@nettunoamp.it)

[postacertificata.direzione@pec.nettunoamp.it](mailto:postacertificata.direzione@pec.nettunoamp.it)

e.p.c.

Preg.mi

**Comandante TV (CP) Antonio Magi**

Ufficio Circondariale Marittimo Ischia

[antonio.magi@mit.gov.it](mailto:antonio.magi@mit.gov.it)

[cp-ischia@pec.mit.gov.it](mailto:cp-ischia@pec.mit.gov.it)

**Dott.ssa Jessica Pazzaglia, Gabriele Procaccini**

Ricercatore Dipartimento EMI SZN

Sede Napoli

**Oggetto:** Richiesta n.5. autorizzazione attività di prelievo di organismi con propri mezzi nautici nell'A.M.P. Regno di Nettuno zone B, B n.t. e C, anno 2024

**Premesso che** la Stazione Zoologica ANTON DOHRN ha recepito con prot. n. 0001477 del 27/02/2024 Autorizzazione dell'AMP, per le attività di ricerca scientifica con propri mezzi nautici nell'A.M.P. Regno di Nettuno zone B, B n.t. e C, anno 2024 escluso le attività di prelievo, per le quali si richiede specifica richiesta;

Con la presente **si chiede autorizzazione** per le seguenti attività di campionamento di 25 frammenti di *Posidonia oceanica*

Le attività di campionamento saranno nei giorni compresi tra il 01-02/07/2024 presso la località Scarrupata di Ischia;

Le attività di campionamento saranno gestite sotto la supervisione del Dott. Gabriele Procaccini e Jessica Pazzaglia, ricercatori presso la Stazione Zoologica, nell'ambito del progetto NBFC.

Nel ringraziare anticipatamente per la collaborazione invio i miei più cordiali saluti.

Arch. Maria Cristina Vigo Majello  
Coordinatore IMC

---

**arch. Maria Cristina Vigo Majello**

Dipartimento CAPE  
Coordinatore IMC

---

Villa Comunale  
80121 Napoli, Italy

[mariacristina.majello@szn.it](mailto:mariacristina.majello@szn.it)  
3384926845

[stazione.zoologica@szn.it](mailto:stazione.zoologica@szn.it)  
[ufficio.protocollo@cert.szn.it](mailto:ufficio.protocollo@cert.szn.it)  
[www.szn.it](http://www.szn.it)
