# Supplementary material for: Back to the Seabed: The Unique Photosystem I Architecture of the Seagrass Posidonia oceanica
Source: Research Square preprint supplement (doi:10.21203/rs.3.rs-8575725/v1), 2026-02-05
Supplement: Supplementary file 1 [file 06249976d418a7f4435c45a5.docx]

Supplementary Information

**Back to the Seabed: The Unique Photosystem I Architecture of the Seagrass *Posidonia oceanica***

Antonello Amelii, Stefano Capaldi, Mattia Russo, Zeno Guardini, Gennaro Sanità, Emanuela Esposito, Irene Olivé, Margherita Maiuri, Luca Dall’Osto, Giulio Cerullo, Gabriele Procaccini and Roberto Bassi.

Corresponding author: [roberto.bassi@univr.it](mailto:roberto.bassi@univr.it)

**This file includes:**

- Supplementary Figures S1 to S24
- Supplementary Tables S1 to S4
- Supplementary References

**Other Supplementary Information for this manuscript includes the following:**

- SupplementaryData S1

.

**
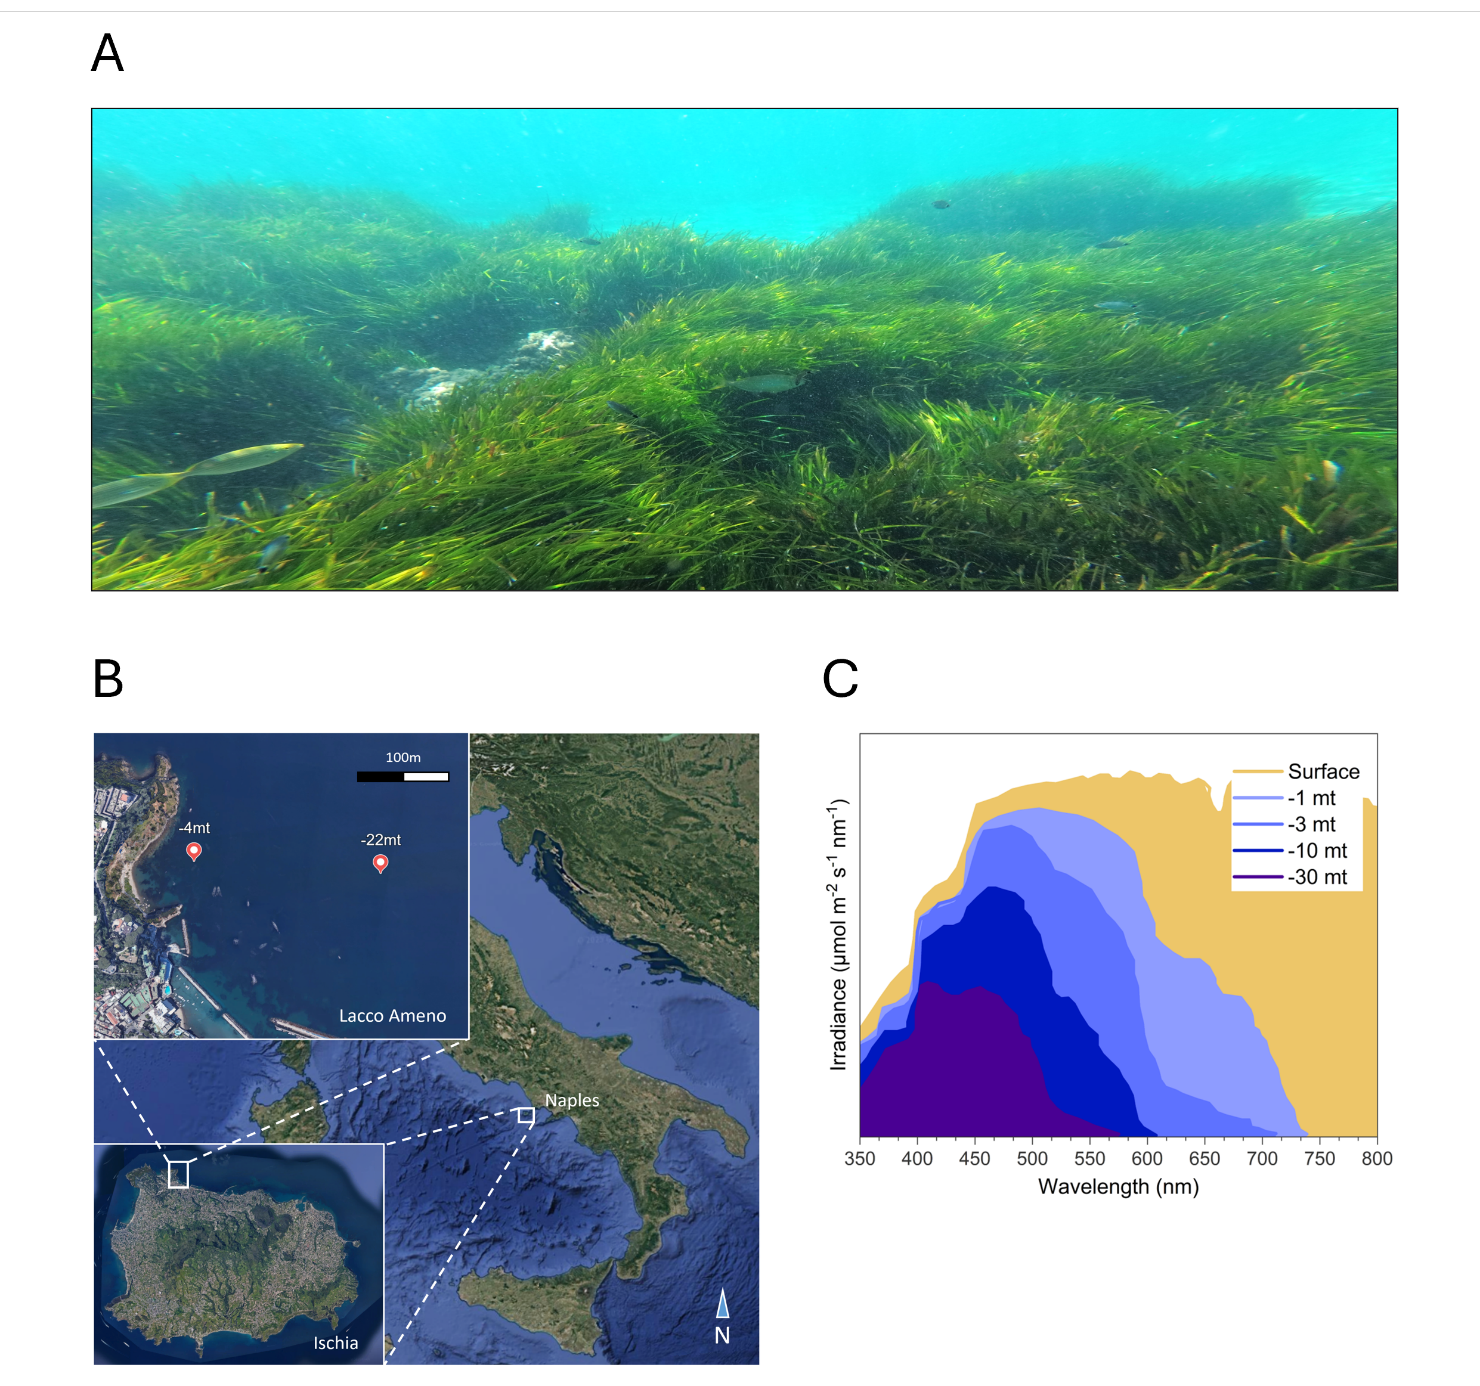
**

**Supplementary Fig. S1. *P. oceanica* meadows, sampling sites, and irradiance spectrum underwater.** (**A**) *P. oceanica* meadow. (**B**) Sampling sites of *P. oceanica* plants used in this study, located at two depths (4 mt and 22 mt) in the Mediterranean Sea near Lacco Ameno, Ischia Island, Naples, Italy. Sites are indicated by red markers: -4 mt (40°45′26″N, 13°53′09″E); -22 mt (40°45′25″N, 13°53′25″E). (**C**) Attenuation of solar irradiance with depth in the water column, adapted from 1.

**
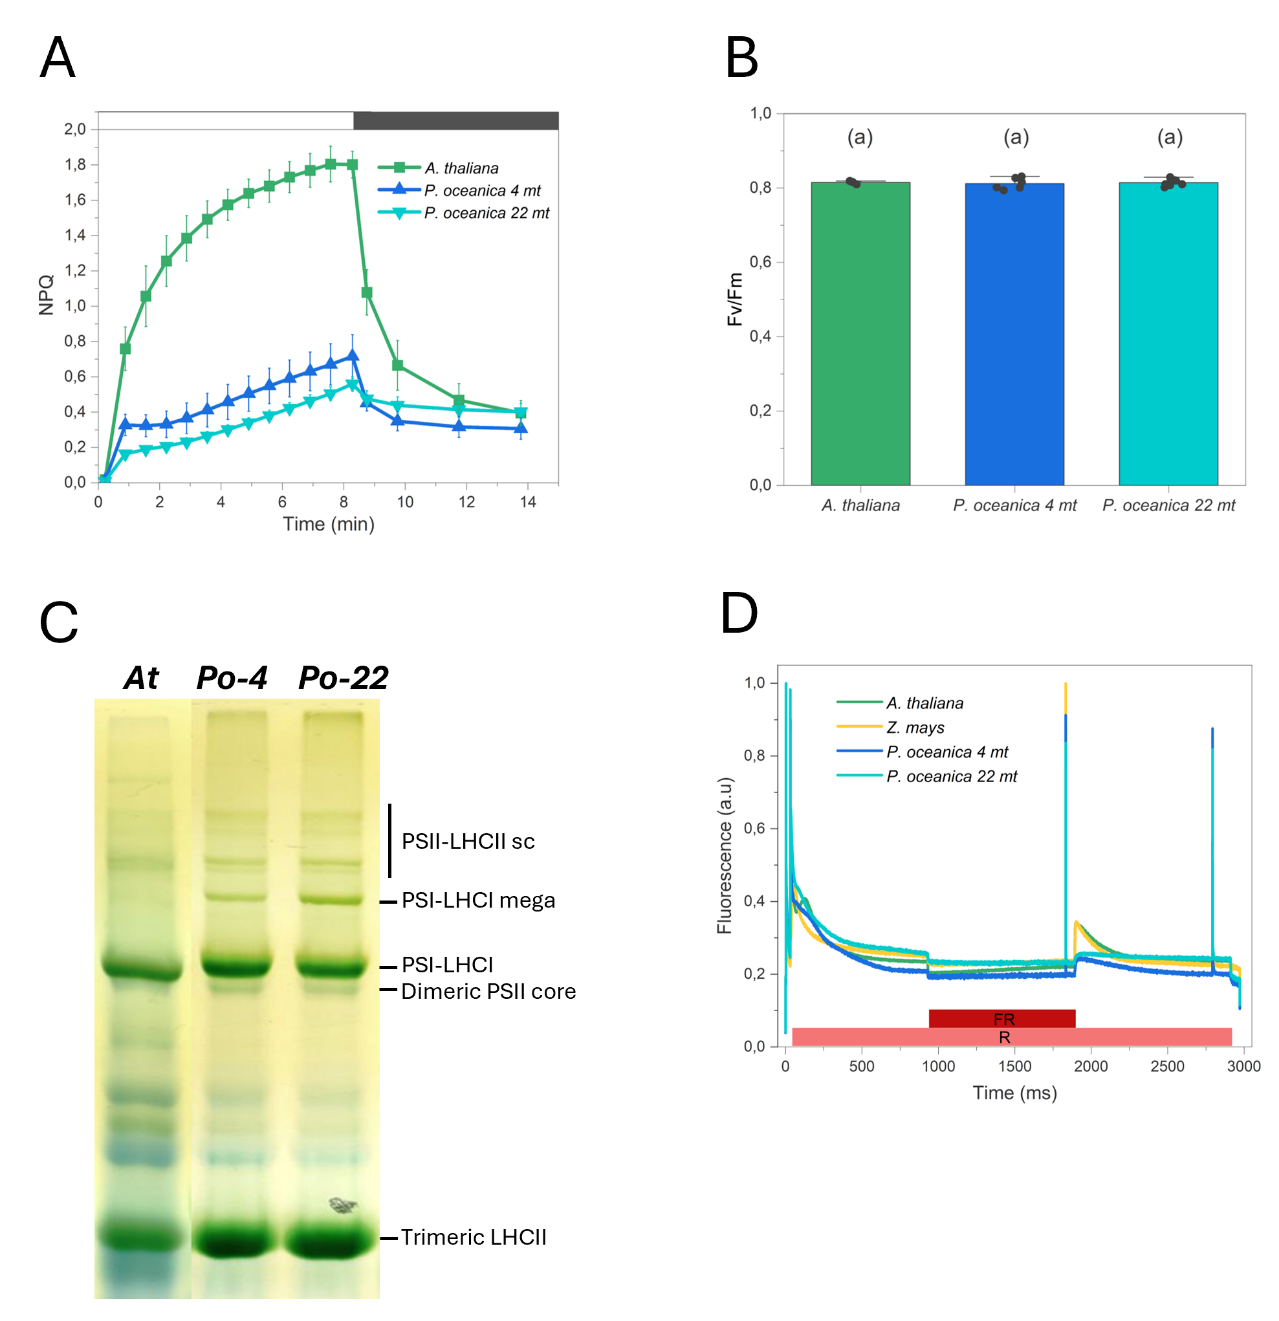
**

**Supplementary Fig. S2. Physiological and biochemical characterization of *P. oceanica* and land plants.** (**A**) NPQ induction and relaxation kinetics measured under actinic light (~1150 μmol photons m⁻² s⁻¹) followed by dark recovery in *P. oceanica* at 4 and 22 m depth and in *A. thaliana* plants (n = 5, 5, and 3 biological replicates, respectively). (**B**) Maximum quantum yield of PSII (Fv/Fm) (n = 6, 6, and 3 biological replicates, respectively). (**C**) Large pore Blue Native-PAGE (4-12.5% acrylamide) of thylakoid membranes to assess the organization of Chl-binding proteins. For each lane, 35 μg of thy were solubilized with 1% β-DDM (w/v). *P. oceanica* thylakoids from plants collected at 4 and 22 mt depth were analyzed, with *P. oceanica* 22 mt samples showing increased abundance of the PSI-LHCI-mega compared to those from 4 mt. The estimated average PSI-LHCI-mega/PSI-LHCI ratio in 22 mt thylakoids is 0.29 ± 0.08 (n=3). Densitometric analysis was performed using the ImageJ software. (**D**) Dual-PAM fluorescence measurements of the state 1-2 transition on *P. oceanica* 4 and 22 mt depth, *A. thaliana* and *Z. mays* plants. Quenching kinetics of PSII fluorescence were extracted from these recordings to calculate qT (**Fig. 1D**). State 1 was established by applying far-red (FR) light in addition to a basal red (R) light, whereas state 2 was triggered by FR removal.

**
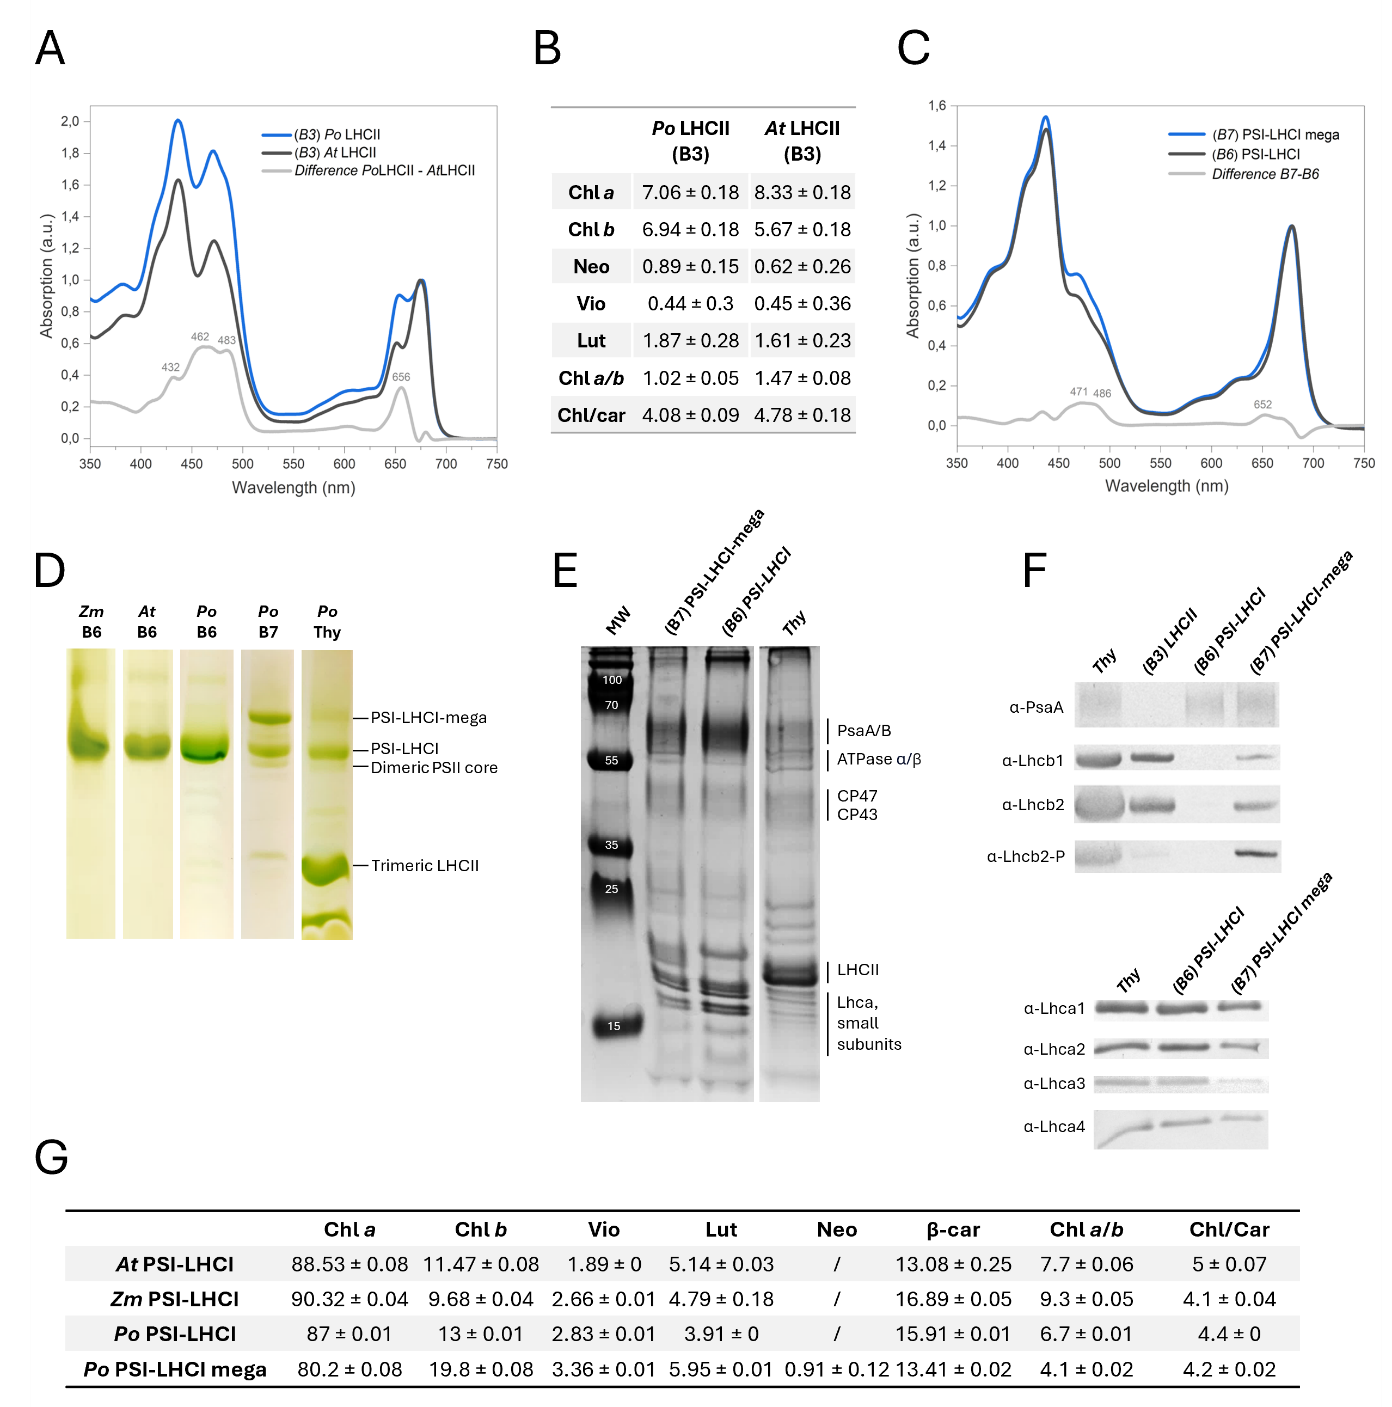
**

**Supplementary Fig. S3. Spectroscopic and biochemical characterization of photosynthetic complexes.** Species abbreviations: *Po*, *P. oceanica*; *At*, *A. thaliana*; *Zm*, *Z. mays*. Bands (B3, B6, B7) correspond to those indicated in **Fig. 1E**. (**A**) Room-temperature absorption spectra of *Po* and *At* trimeric LHCII (B3). *Po* LHCII displayed enhanced absorption at 460-483 nm and 650-660 nm, consistent with elevated Chl *b* levels compared to *At* LHCII. (**B**) Pigment composition of trimeric LHCII (B3) from *Po* and *At*, determined by spectral fitting of acetone extracts (n=6). (**C**) Room-temperature absorption spectra of *Po* PSI-LHCI-mega (B7) and PSI-LHCI supercomplex (B6). The mega-complex exhibited increased absorption at 460-486 nm and 652 nm (highlighted in the difference spectra), indicative of higher Chl *b* content derived from trimeric LHCII and Lhca15-46 dimer. Spectra were normalized to the Qy maximum. (**D**) Non-denaturing Deriphat-PAGE (4-12% acrylamide) of *Po* thylakoid (thy) membranes (22 mt depth) and bands from **Fig. 1E** to assess Chl-binding protein composition. Thylakoids were solubilized with a final 1% β-DDM (w/v). (**E**) Coomassie-staining SDS-PAGE of thylakoid membranes (22 mt depth), *Po* PSI-LHCI (B6), and PSI-LHCI-mega (B7). The mega-complex contained an additional band corresponding to LHCII. (**F**) Immunoblot analysis of protein subunits from *Po* thylakoids (thy) membranes (22 mt depth), trimeric LHCII (B3), PSI-LHCI (B6), and PSI-LHCI-mega (B7). Detection of phosphorylated (P) Lhcb2 was performed using the α-Lhcb2-P antibody. (**G**) HPLC pigment quantification of *Po* PSI-LHCI-mega (B7) and *At*, *Zm*, *Po* PSI-LHCI (B6) complexes. Chl *a*, Chlorophyll *a*; Chl *b*, Chlorophyll *b*; Vio, violaxanthin; Lut, lutein; Neo, neoxanthin; β-car, β-carotene.

**
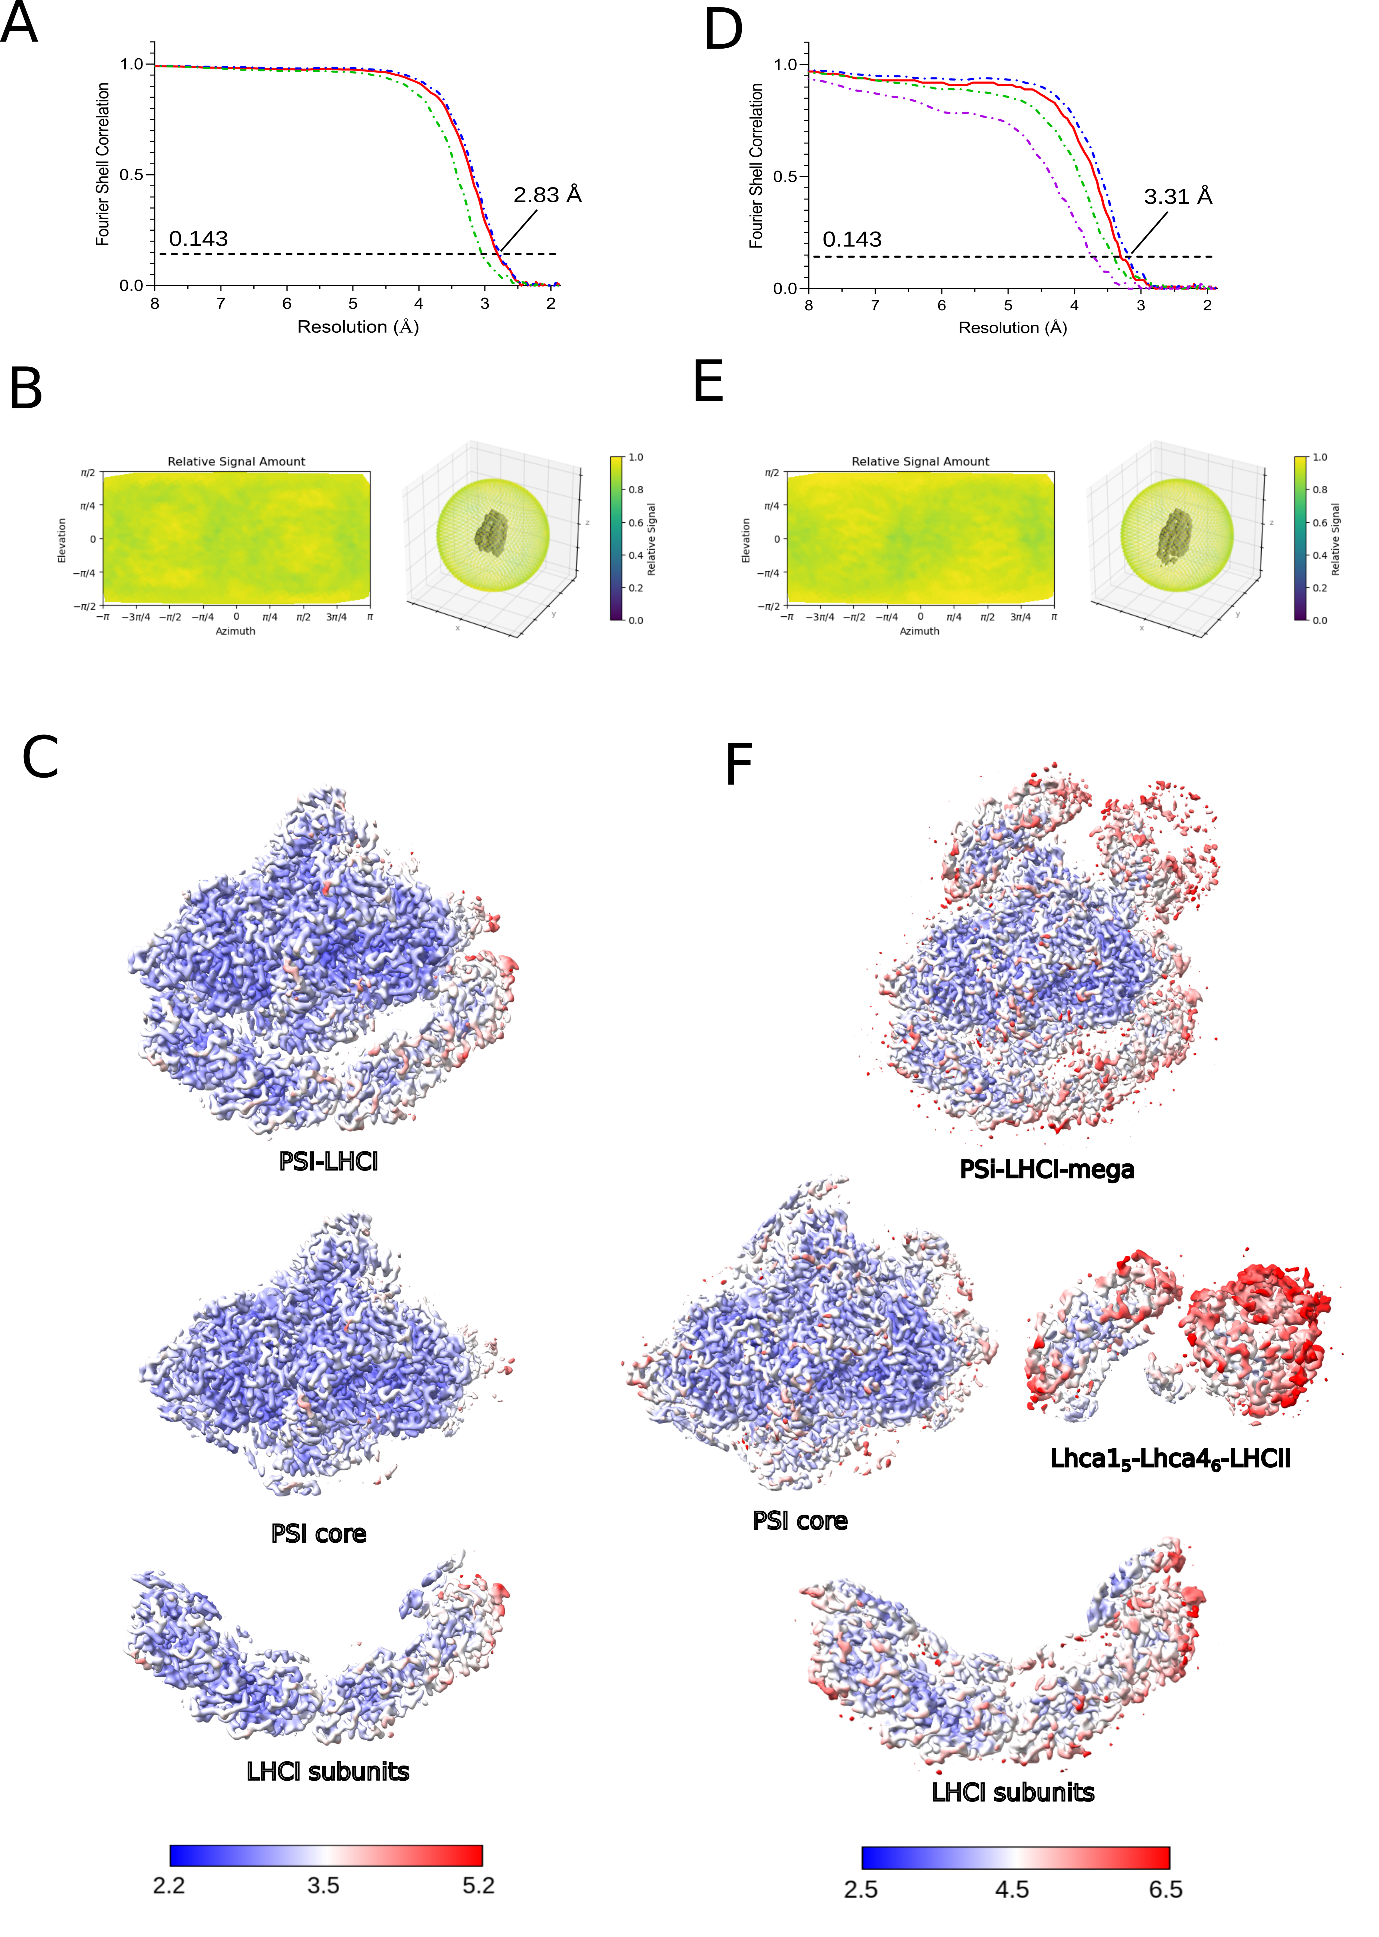
**

**Supplementary Fig. S4. Cryo-EM structure determination of *P. oceanica* PSI-LHCI and PSI-LHCI mega-complexes.** The Gold Standard Fourier Shell Correlation (GSFSC) curves of the PSI-LHCI (continuous red line, consensus map; dashed blue line, focused map PSI core; dashed green line, focused map LHCI subunits) (**A**) and PSI-LHCI-mega (continuous red line, consensus map; dashed blue line, focused map PSI core; dashed green line, focused map LHCI subunits; dashed magenta line, Lhca15-Lhca46-LHCII) (**D**) consensus maps with a resolution-cutoff threshold at 0.143. Relative Signal Amount vs. Viewing Direction plots for PSI-LHCI (**B**) and PSI-LHCI mega (**E**). Local resolution estimation in the Cryo-EM maps of *P. oceanica* PSI-LHCI (**C**) and PSI-LHCI mega (**F**) supercomplexes.


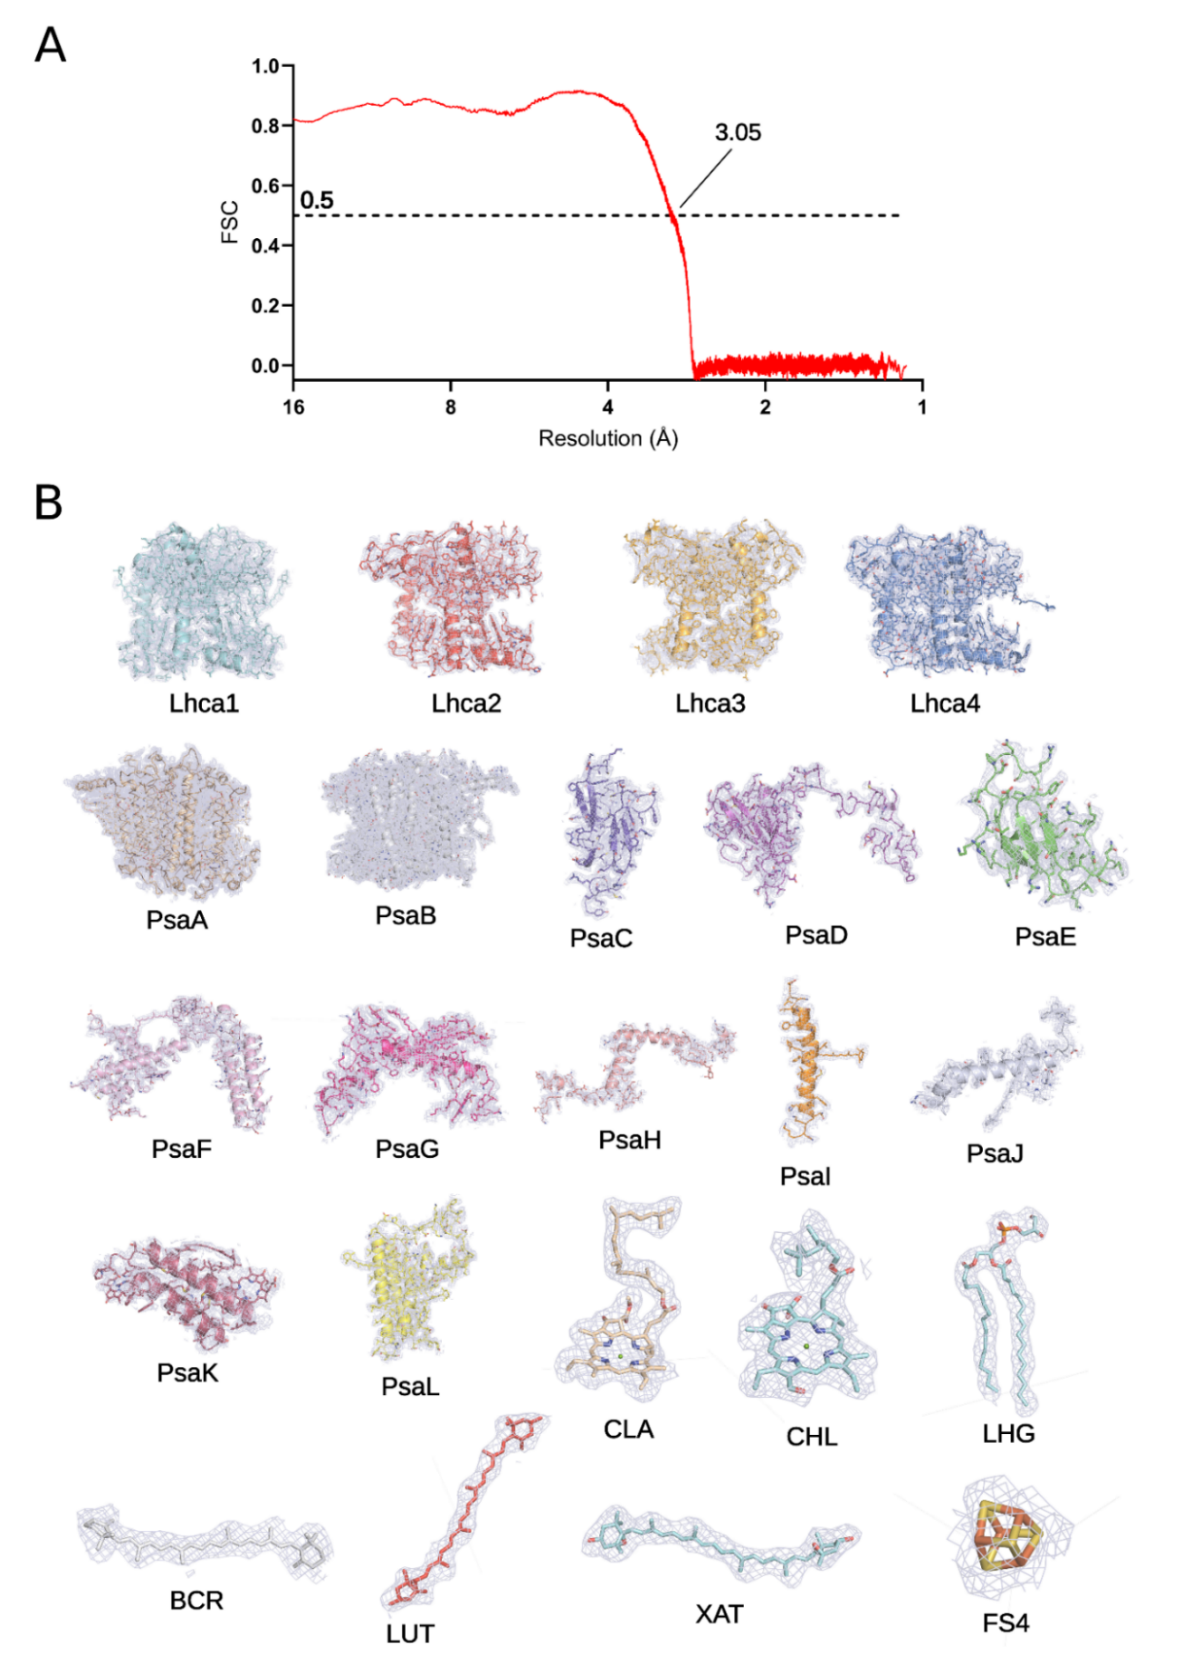


**Supplementary Fig. S5. Cryo-EM density maps of protein chains and representative cofactors of *P. oceanica* PSI-LHCI.** (**A**)The Fourier shell correlation (FSC) curve between the model and the composite Cryo-EM density map of PSI-LHCI.(**B**) LHCI and PSI core subunits (shown in cartoon) and representative ligands (stick models) surrounded by the Cryo-EM density maps. CLA, Chlorophyll *a*; CHL, Chlorophyll *b*; BCR, β-carotene; LUT, Lutein; XAT, Violaxanthin; LHG, 1,2-dipalmitoyl-phosphatidyl-glycerole; FS4, Fe2S2 iron-sulfur cluster.


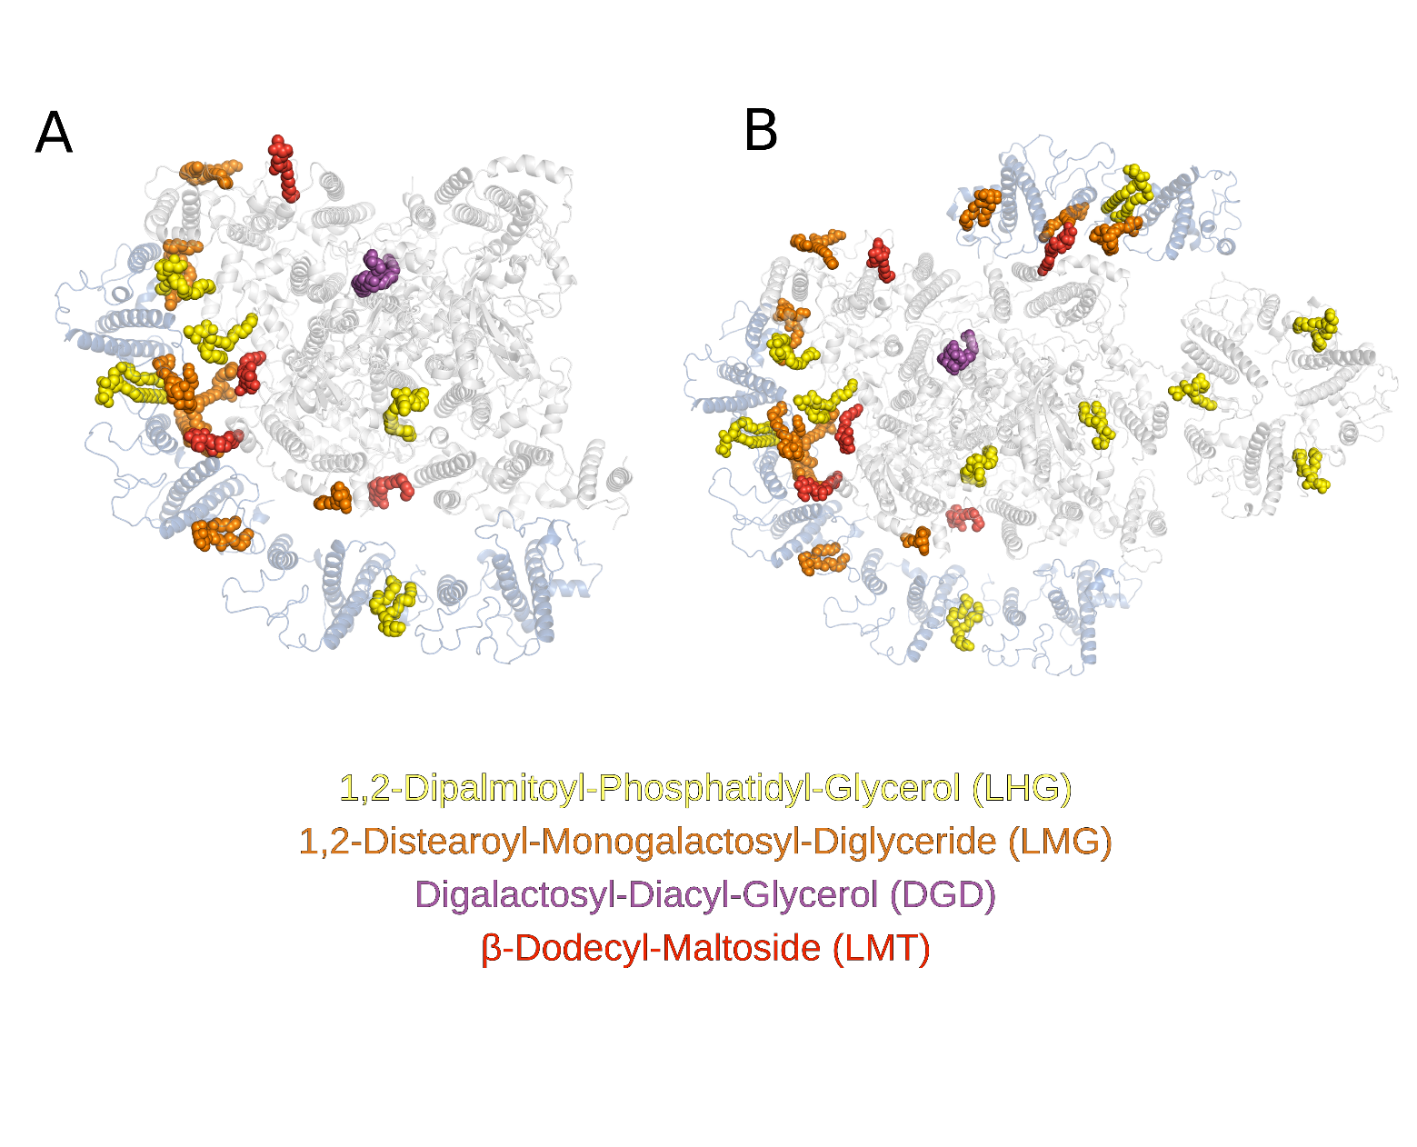
**Supplementary Fig. S6. Lipid and detergent molecules found in the structures of *P. oceanica* PSI-LHCI supercomplexes.** The molecules identified in the structures of PSI-LHCI (**A**) and PSI-LHCI-mega (**B**) are depicted as sphere models in different colors.


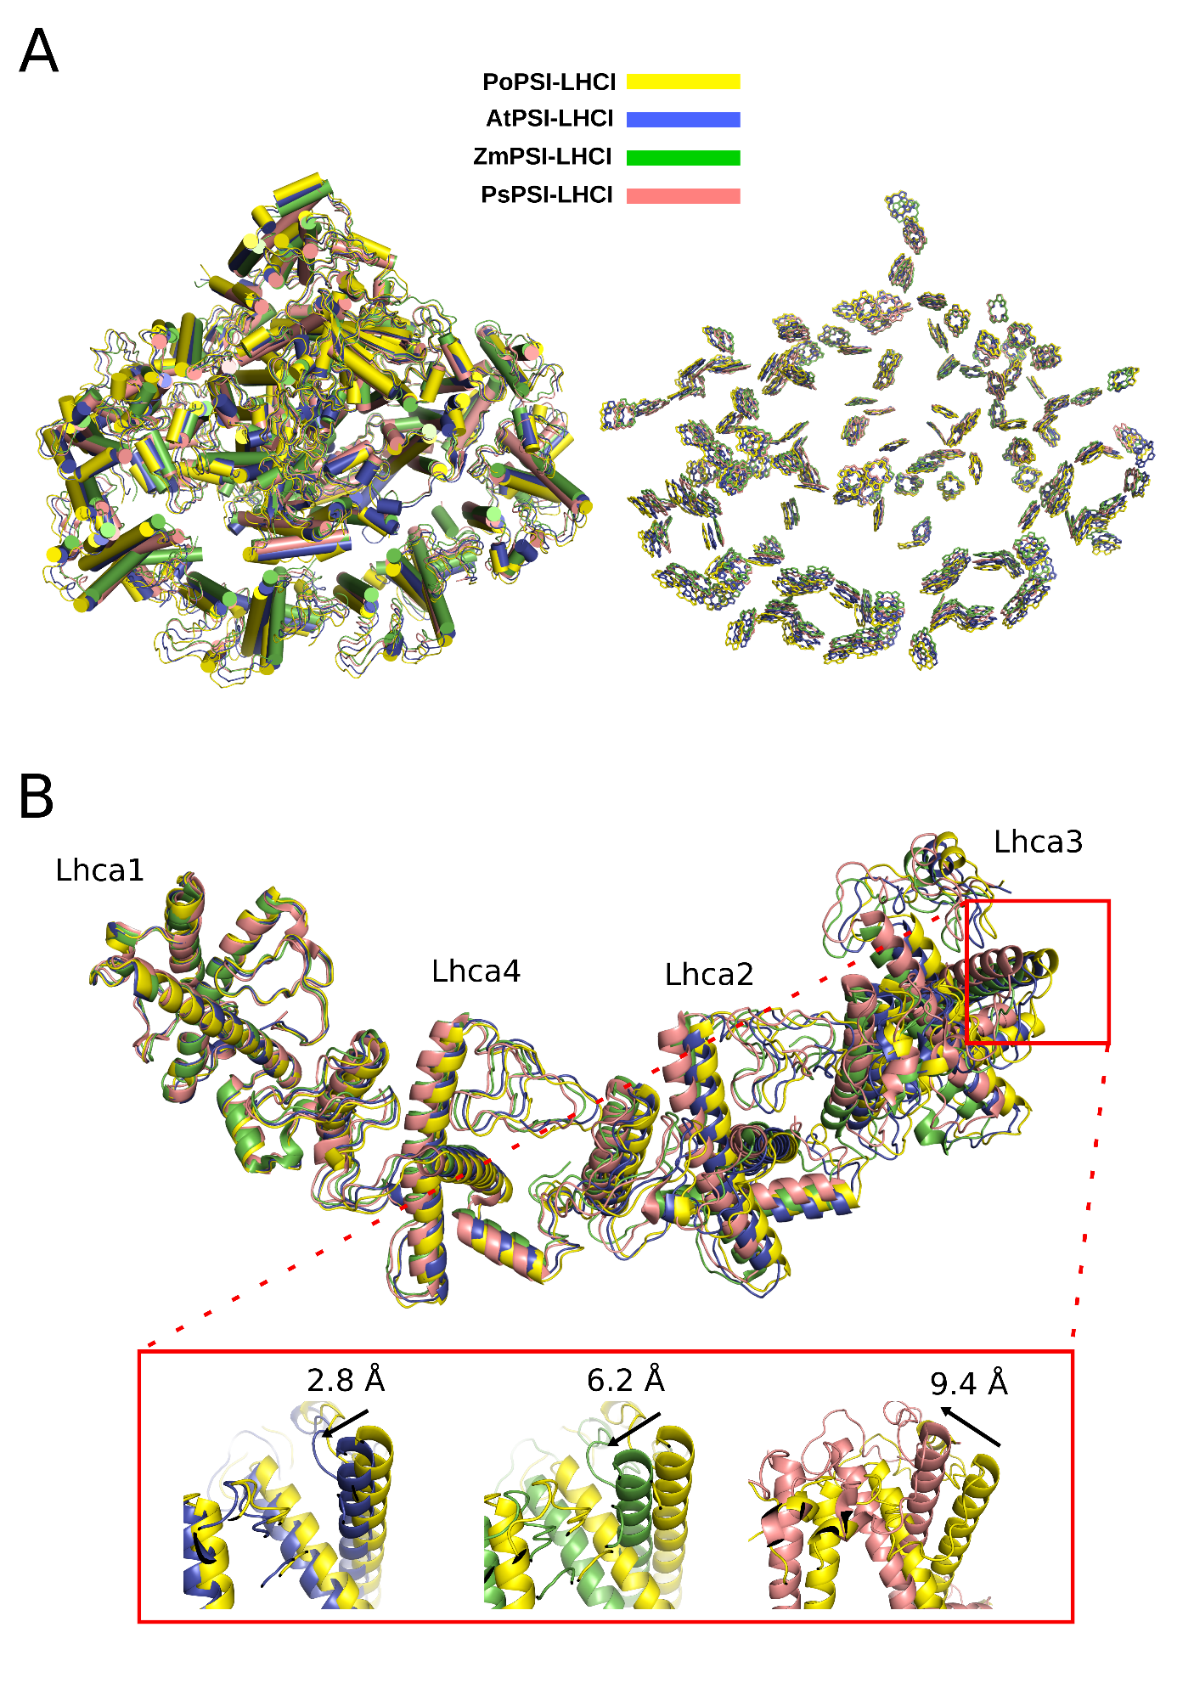


**Supplementary Fig. S7. Structural comparison of *P. oceanica* PSI-LHCI with other higher land plant PSI-LHCI.** Species abbreviations: *Po*, *P. oceanica*; *At*, *A. thaliana*; *Zm*, *Z. mays*. (**A**)Global Cɑ superimposition of *Po* PSI-LHCI (yellow, PDB 9S1L) with that of *At* (blue, PDB 9GBI), *Zm* (green, PDB 5ZJI), and *Ps* (salmon, PDB 7DKZ). The location of the Chl rings is shown on the right panel. (**B**) The LHCI belt of the same complexes aligned on the Cɑ position of Lhca1. The shift in the position of the third transmembrane helix relative to *Po* PSI-LHCI in the three structures is shown in the red box.


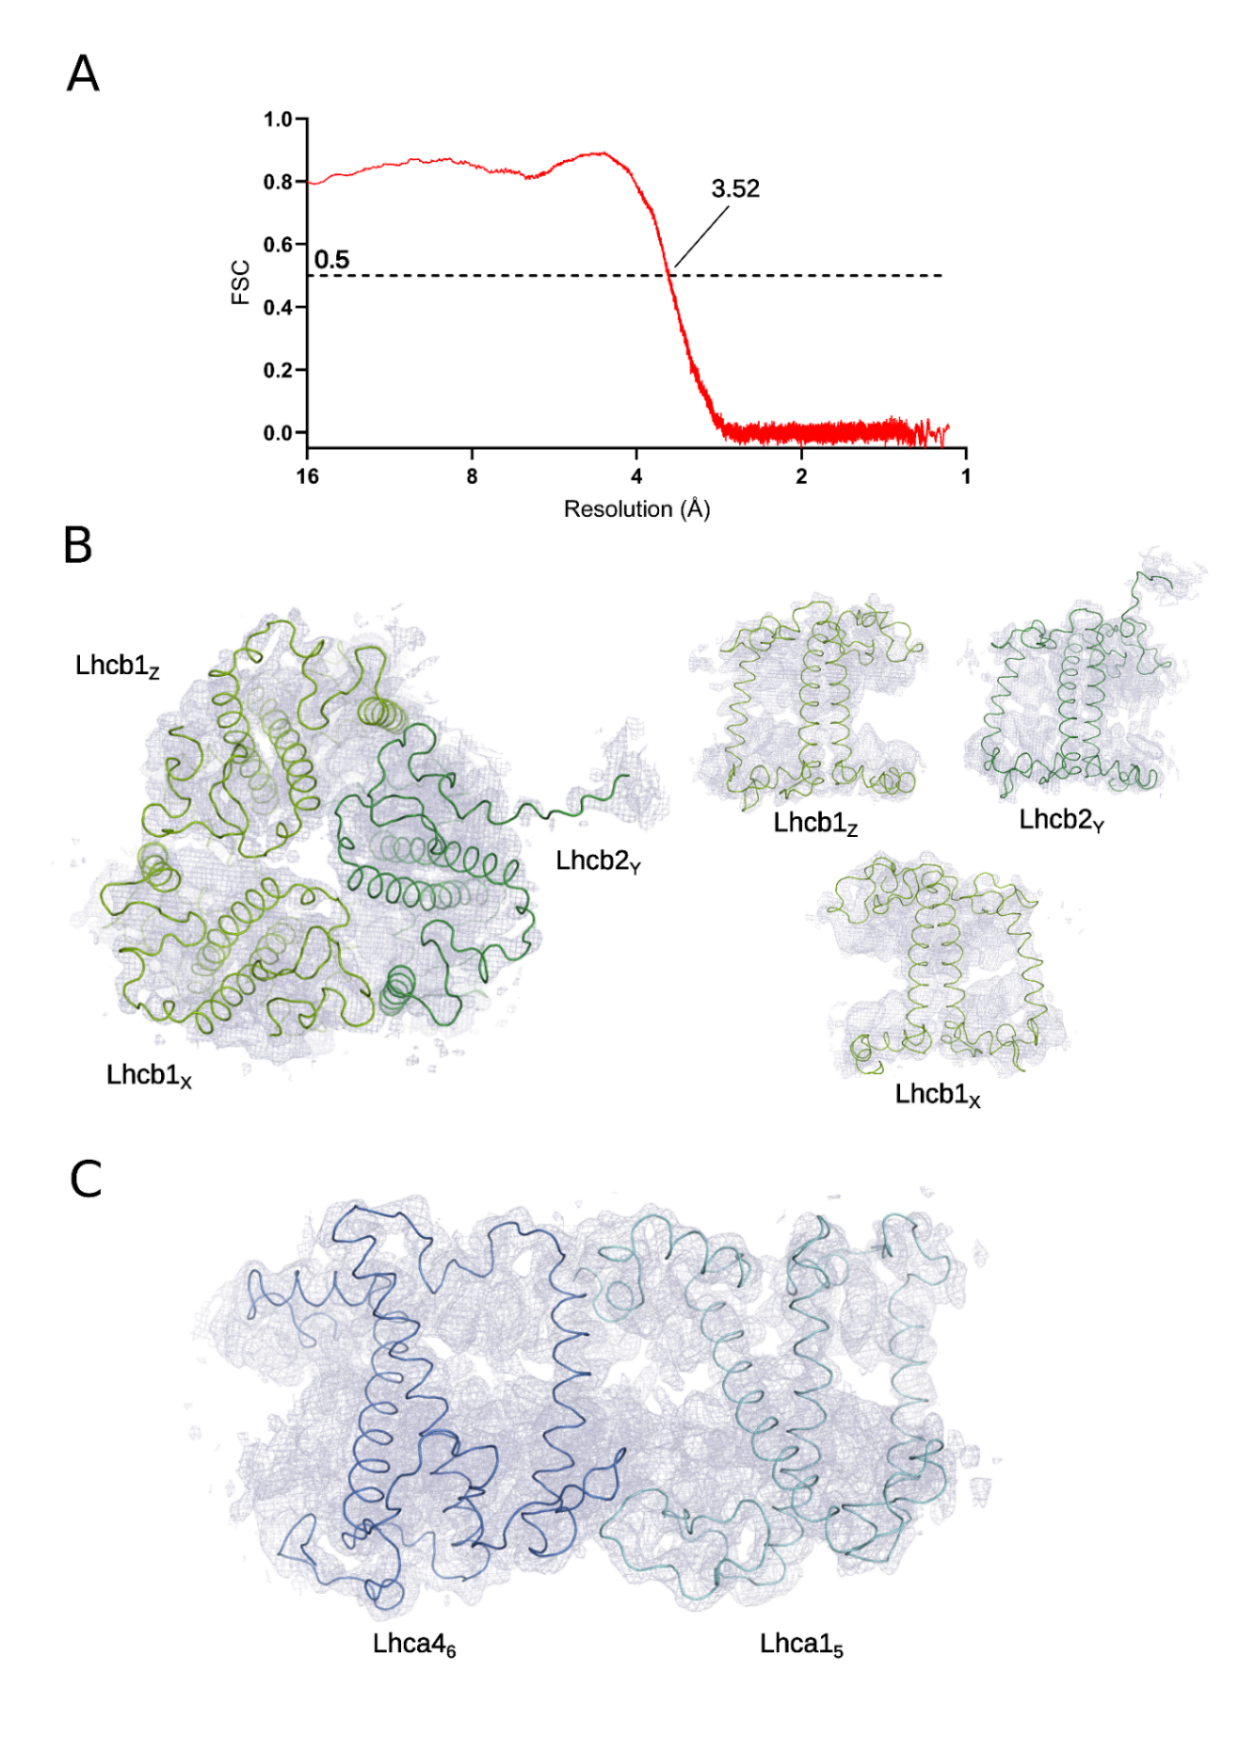


**Supplementary Fig. S8. Density maps of the additional LHC subunits in *P. oceanica* PSI-LHCI-mega complex.** (**A**) The Fourier shell correlation (FSC) curve between the model and the composite Cryo-EM density map of PSI-LHCI-mega. (**B**) Cryo-EM density (contour level 3.5σ) of the LHCII timer (left) and of the single Lhcb subunits (right). (**C**) Cryo-EM density (contour level 3.5σ) of the Lhca15-Lhca46 dimer. The subscripts indicate the name of the chain in the PDB file.

**
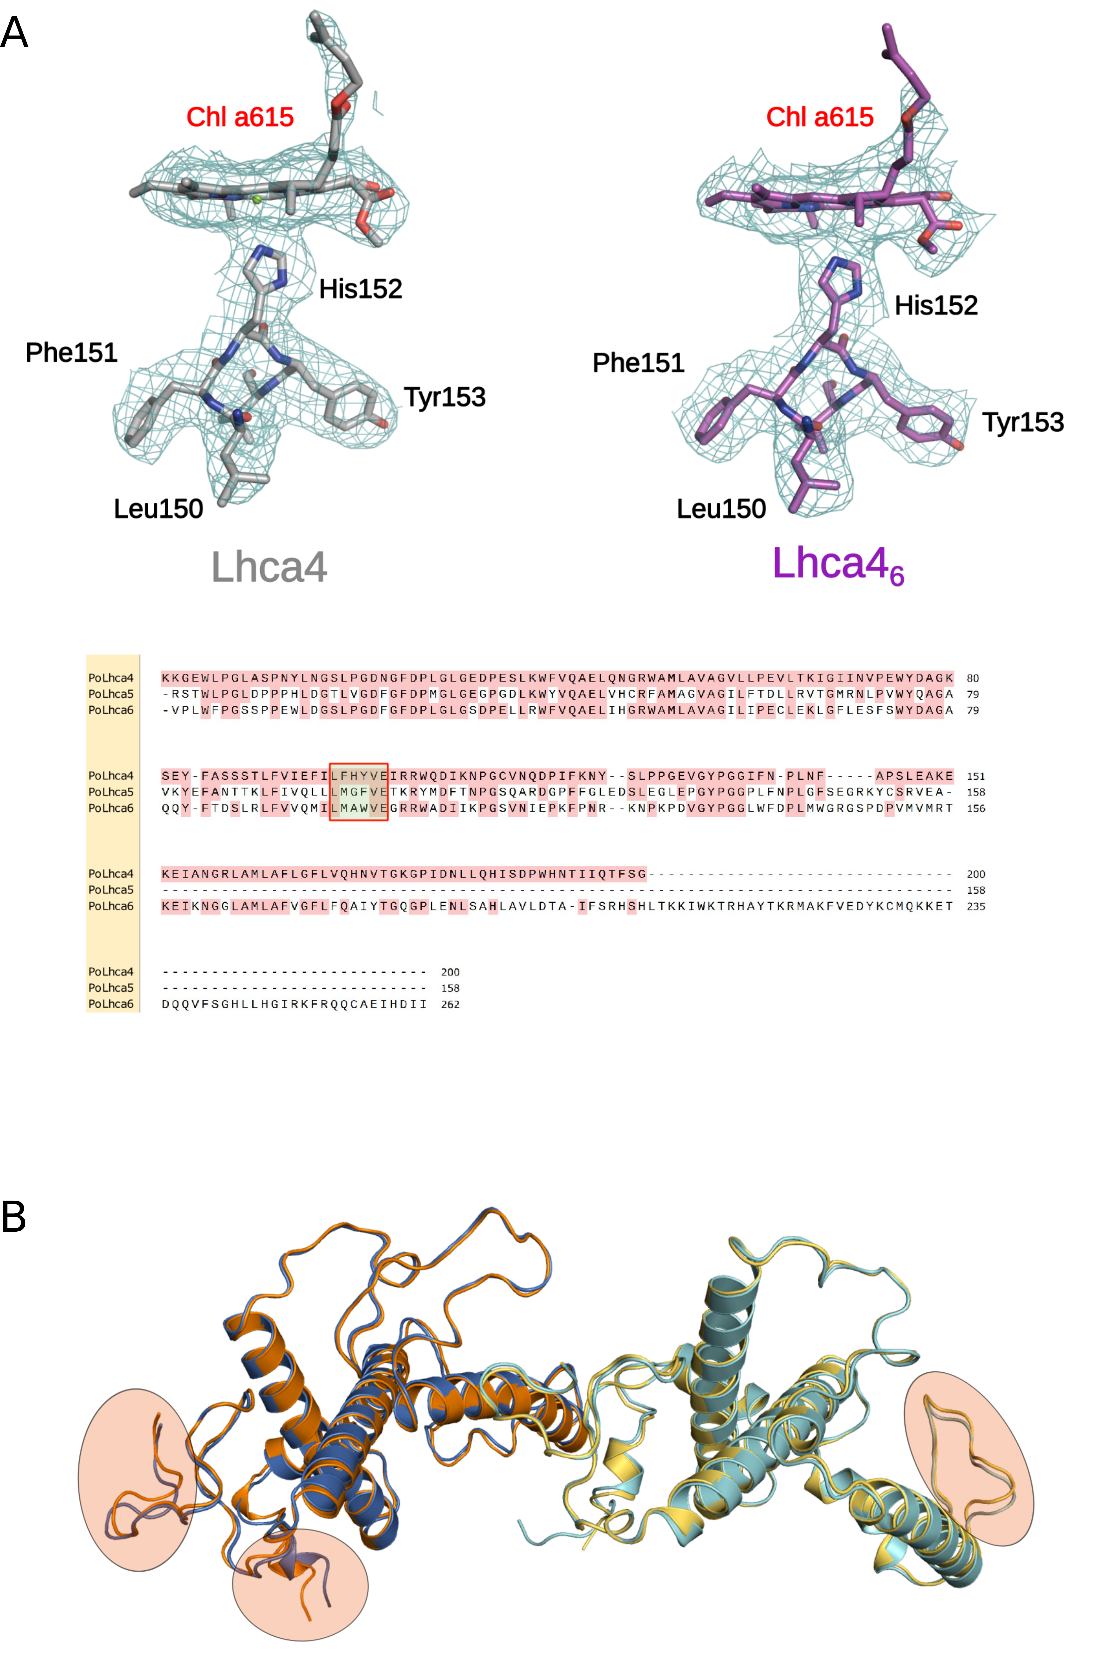
**

**Supplementary Fig. S9. Comparison of the two Lhca1-Lhca4 dimers of PSI-LHCI-mega.** A) Top panel: Cryo-EM density maps (3.5σ contour level) surrounding the Leu150-Tyr153 and Chl *a*615 residues in Lhca4 and Lhca41. Bottom panel: sequence alignment of Lhca4 with the other two Lhca isoforms (Lhca5 and Lhca6) identified in the *P. oceanica* genome. The red box indicates the stretch of residues shown above. The different residues and the absence of the axial Chl ligand at these positions exclude the presence of alternative isoforms in the additional Lhca dimer of PSI-LHCI-mega. B) Structural alignment of the two Lhca1-Lhca4 dimers (Cα RMSD = 0.57 Å). The greater structural diversity (highlighted by the ovals) between the two dimers can be observed in the regions where they establish contacts with different subunits within the supercomplex.


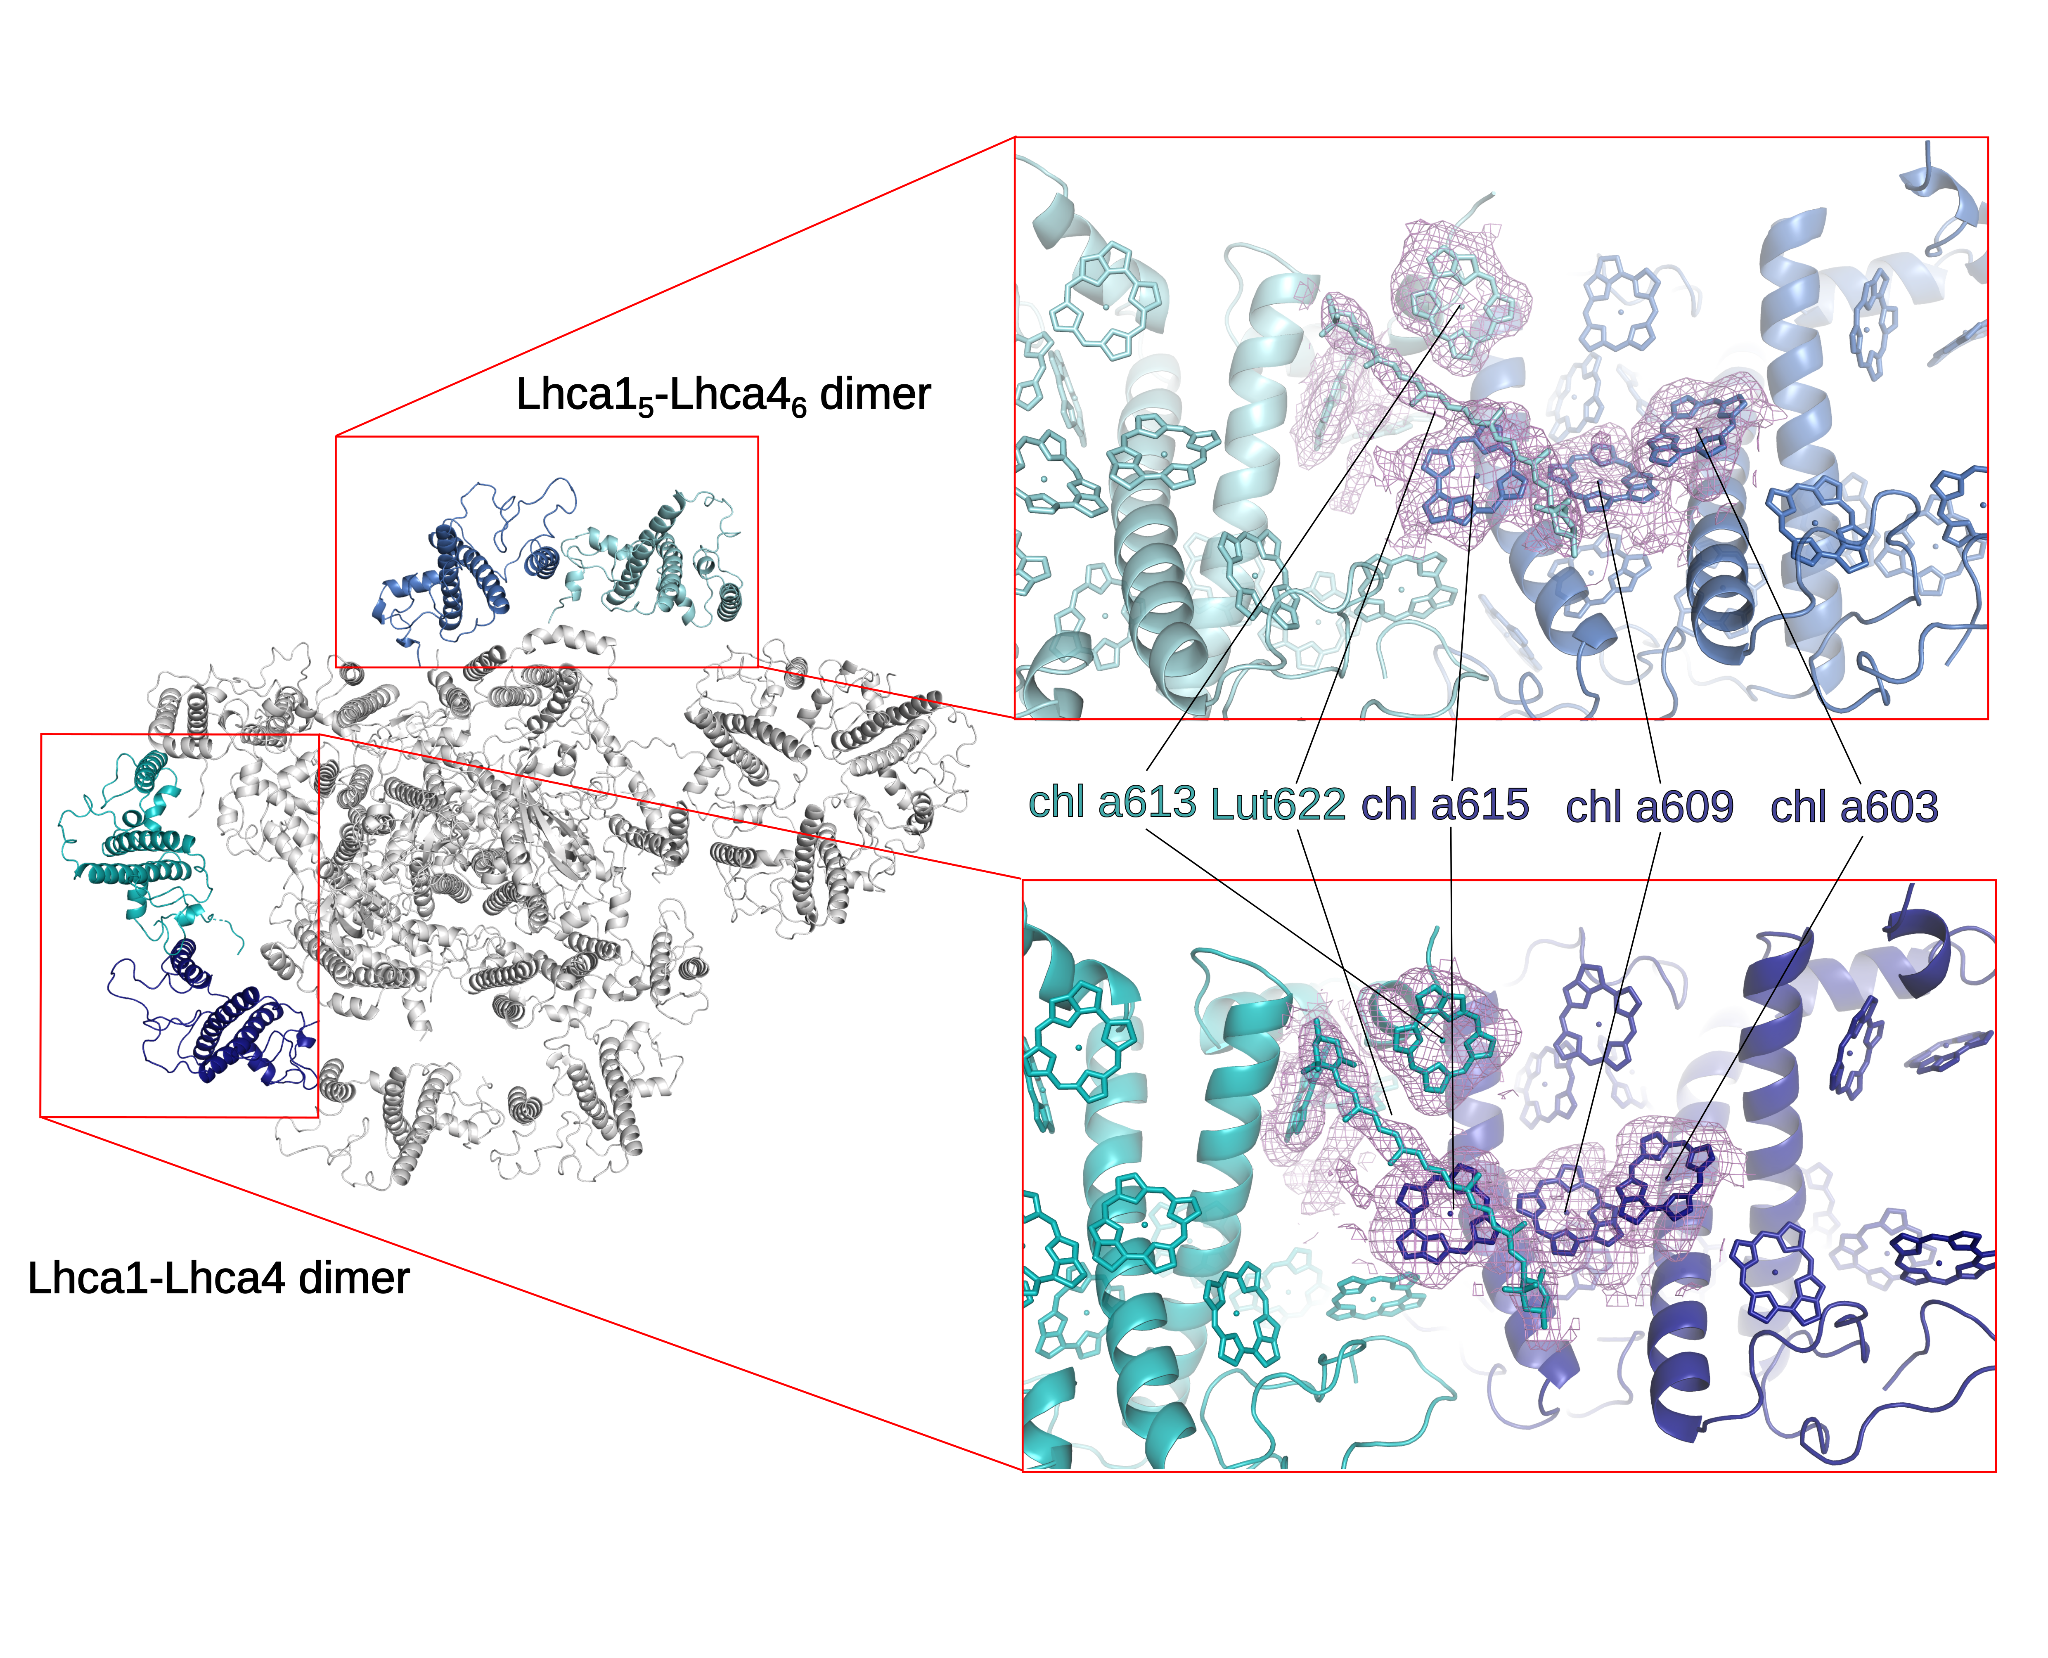


**Supplementary Fig. S10. Comparison of chromophores in the two Lhca1-Lhca4 dimers of *P. oceanica* PSI-LHCI-mega complex.** The choromophores located near the Lhca1-Lhca4 interface (Chl *a*6131, *a*6034, *a*6094, *a*6154, and the Lut6221) are shown surrounded by their Cryo-EM density map (3.5σ contour level) in the Lhca1-Lhca4 and Lhca15-Lhca46 dimers.


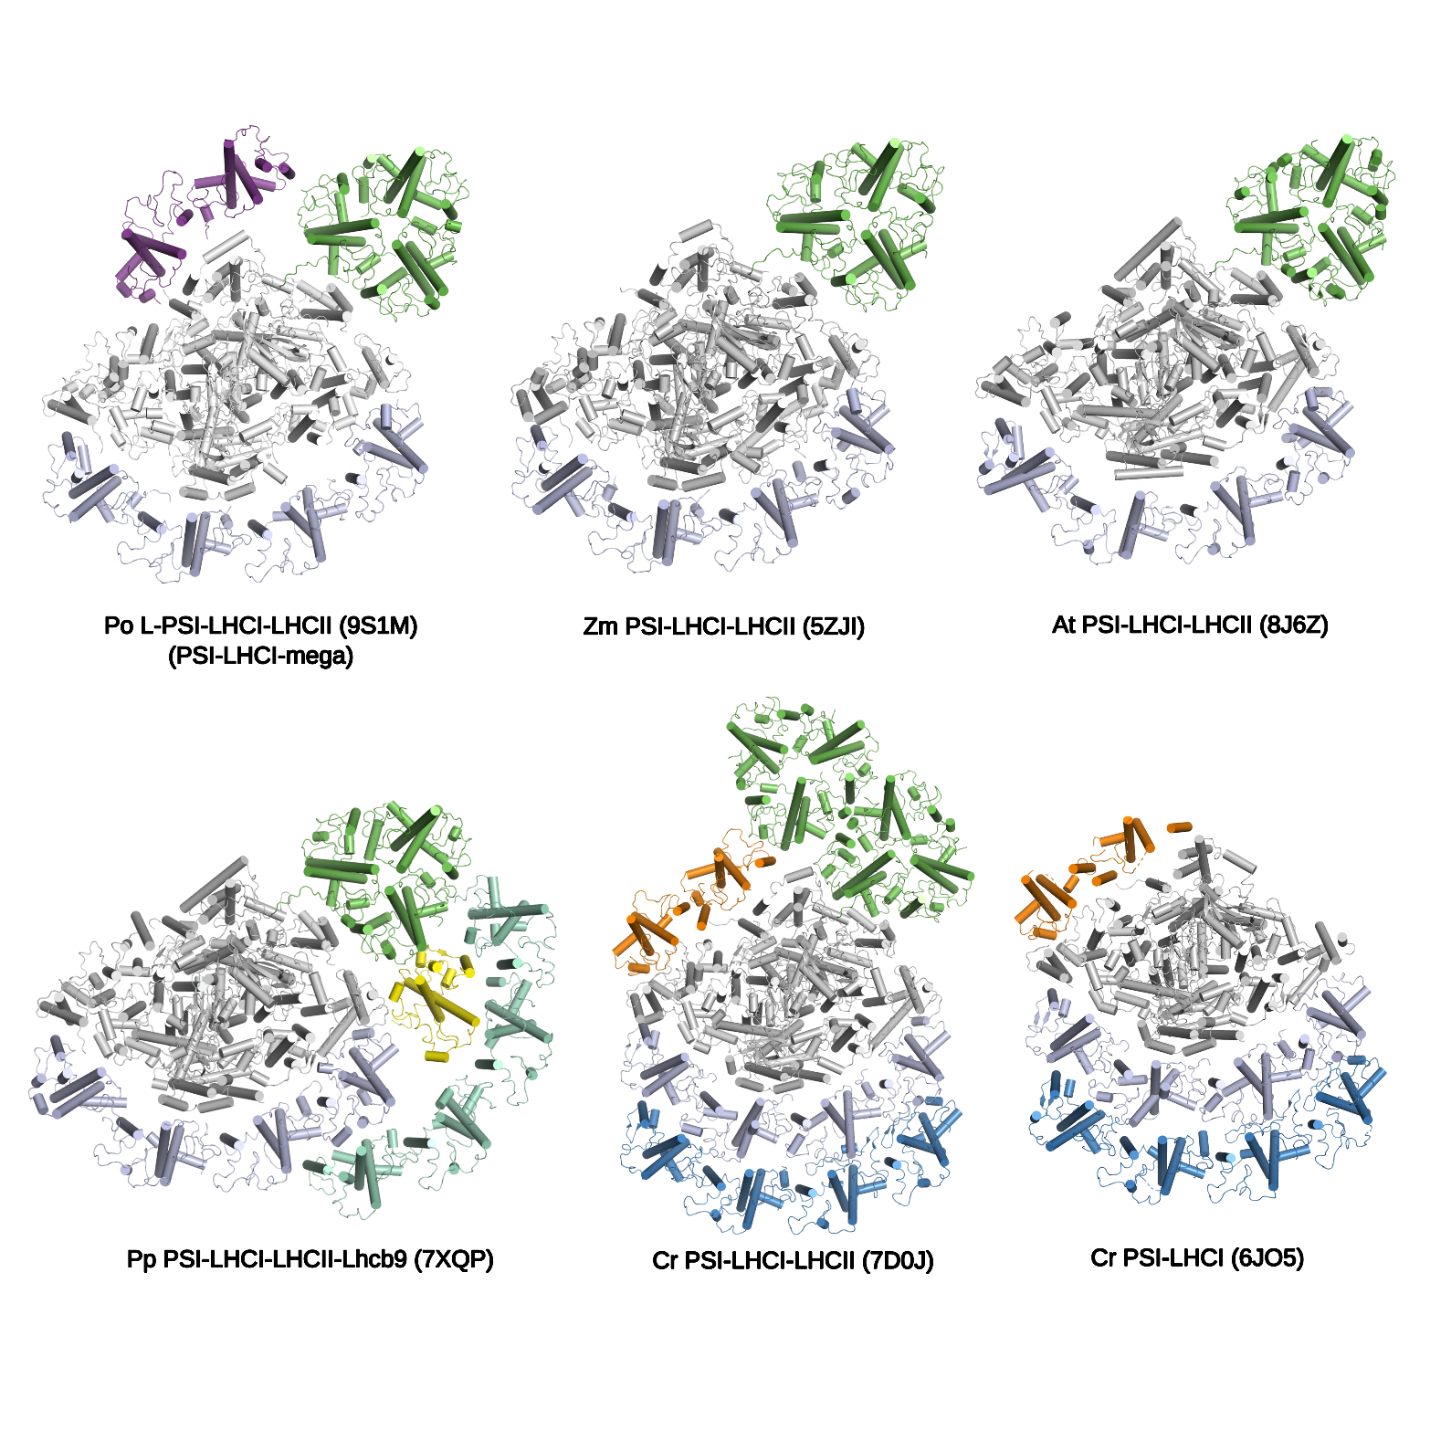


**Supplementary Fig. S11. Structural models of PSI-LHCI-LHCII supercomplexes from different species.** Cartoon models of PSI-LHCI-LHCII supercomplexes. The PSI core subunits are shown in gray, the first LHCI belt in lavender, the second LHCI belt in blue or light blue, and the LHCII trimer in green. The additional LHCI dimer is depicted in violet for *P. oceanica* and in orange for *C. reinhardtii*. The Lhcb9 subunit of *P. patens* is shown in yellow. PDB codes of the different structures are given in parentheses. Species abbreviations: *Po*, *P. oceanica*; *Zm*, *Z. mays*; *At*, *A. thaliana; Pp, P. patens; Cr, C. reinhardtii.*


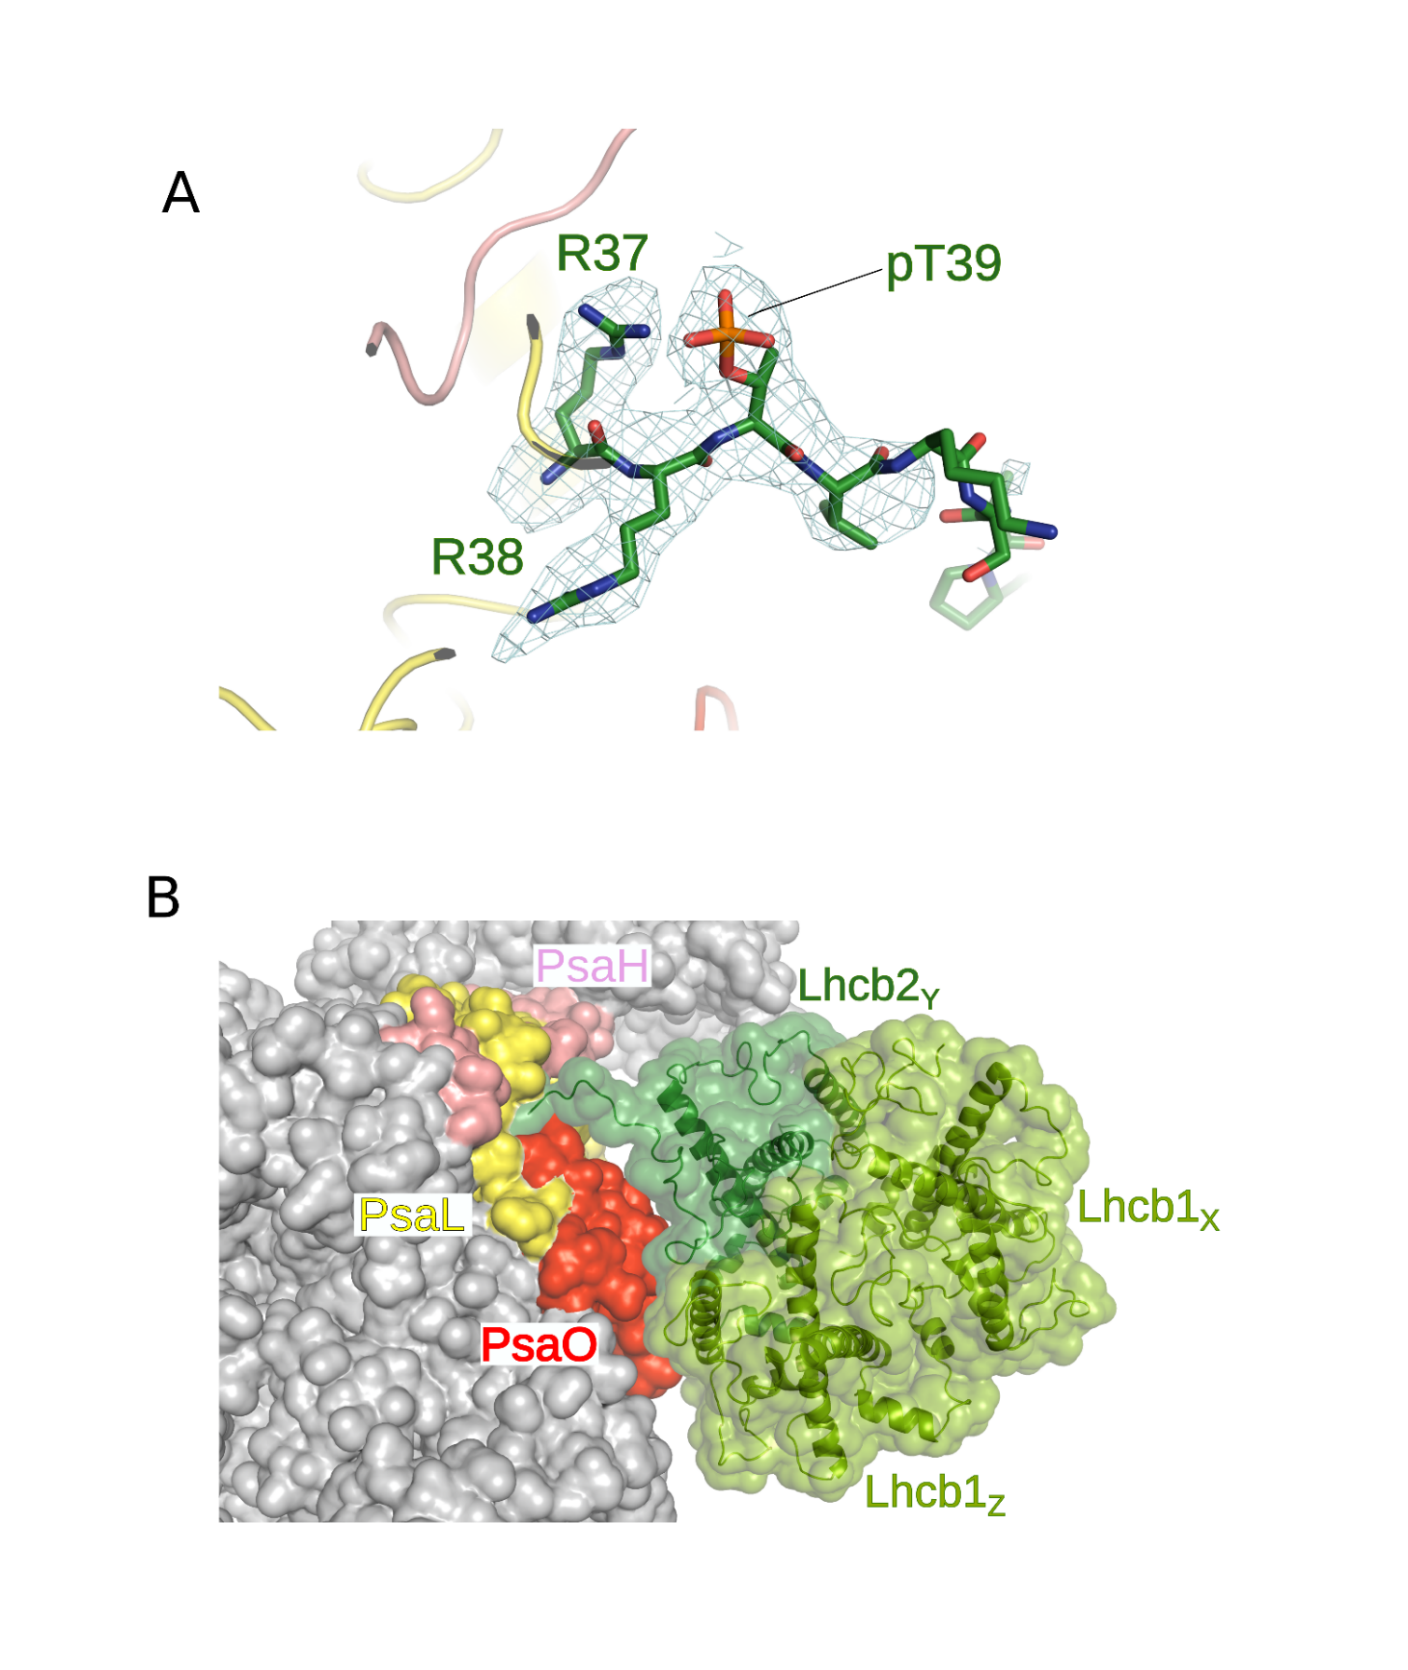


**Supplementary Fig. S12. Interaction of the LHCII trimer with the PSI core in *P. oceanica* PSI-LHCI mega-complex.** (**A**) The phosphorylated RRpT motif of Lhca2Y is surrounded by the Cryo-EM density map contoured at the 3.5σ level. **b**) Surface model of the core subunits PsaH (pink), PsaL (yellow), and PsaO (red) in contact with the LHCII trimer (light green, Lhcb1; dark green Lhcb2). The cartoon model of LHCII is visible in transparency. All the other subunits are shown in gray.


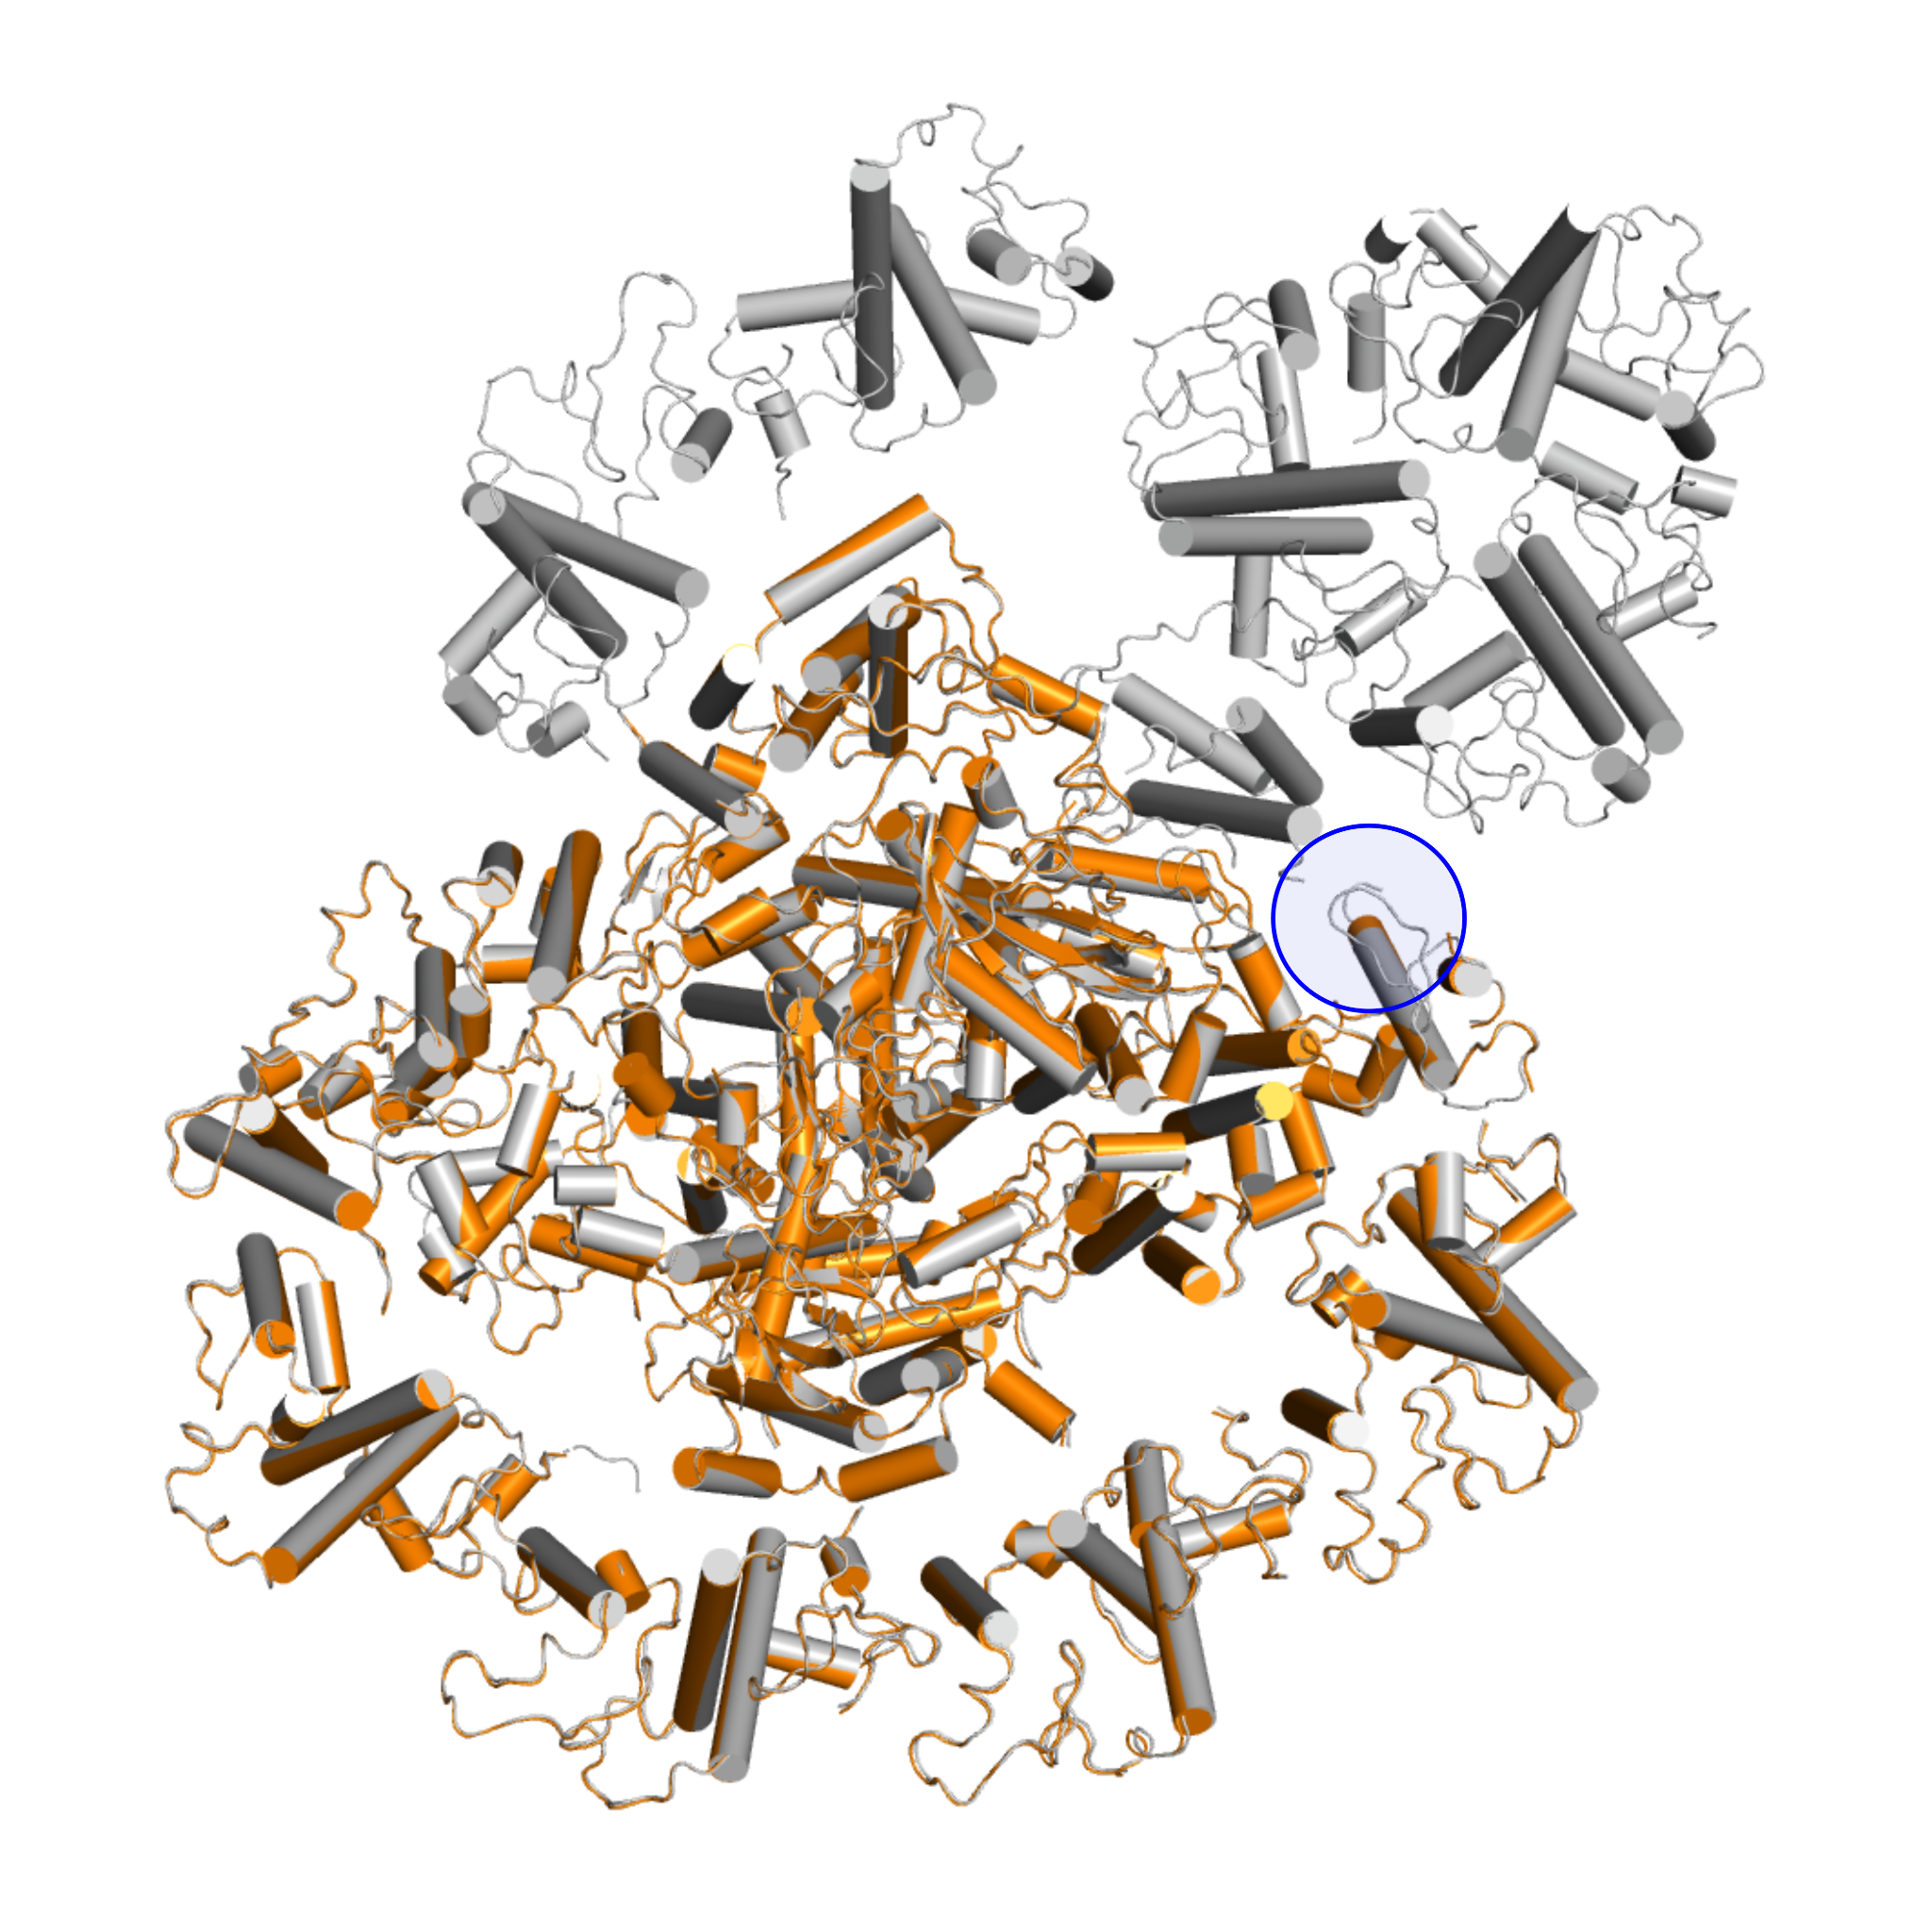


**Supplementary Fig. S13. Structural comparison of *P. oceanica* PSI-LHCI and PSI-LHCI-mega complexes.** Superimposition of the structures of PSI-LHCI (orange) and PSI-LHCI-mega (grey). The position of the flexible loop of PsaK (residues 71-101) is highlighted by the blue circle.


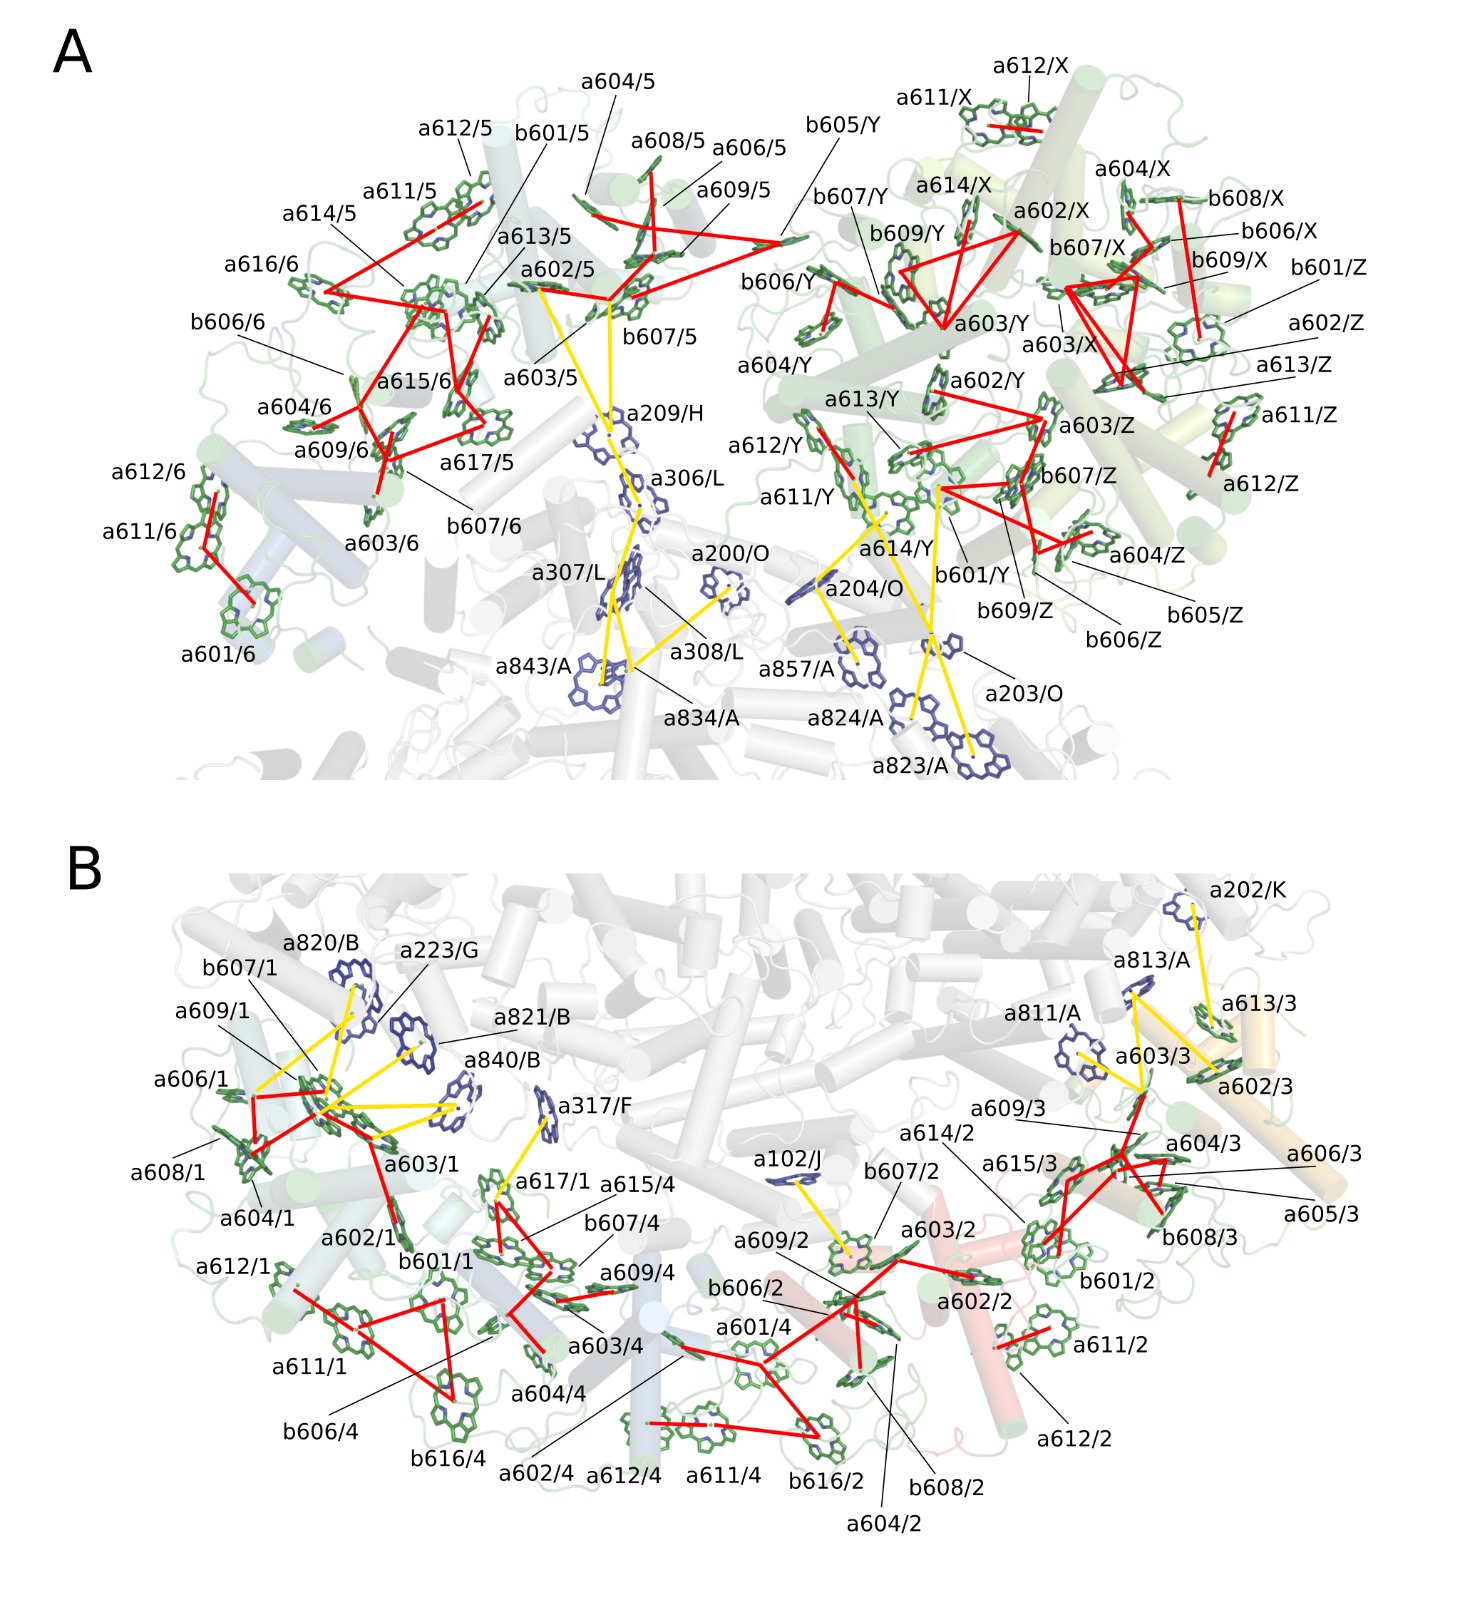


**Supplementary Fig. S14. Excitation Energy transfer (EET) pathways of *P. oceanica* PSI-LHCI mega-complex.** (**A**) Major plausible EET pathways within LHCII and the additional Lhca1–4 dimer subunits, including intra- and inter-subunit transfers. (B) Major plausible EET pathways within and between LHCI belt subunits. Red lines indicate major EET between chlorophylls (chl) within the antenna system, while yellow lines represent major EET from antenna to core subunits. Chls in the antenna subunits are shown in green, while those in the core subunits are shown in lavander. Calculated EET rates (in picoseconds) are provided in Table S3 and in **Data 1.**

**
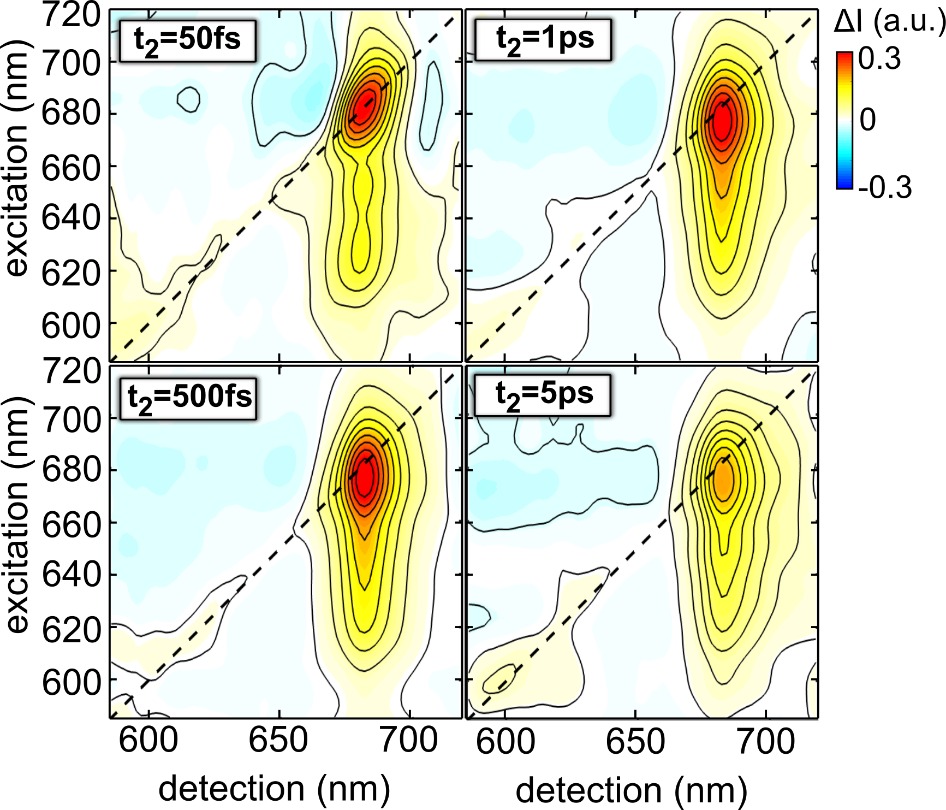
**

**Supplementary Fig. S15. 2DES results of *P. oceanica* PSI-LHCI.** 2DES maps at four different waiting times: t2=50 fs, 500 fs, 1 ps, and 5 ps.

**
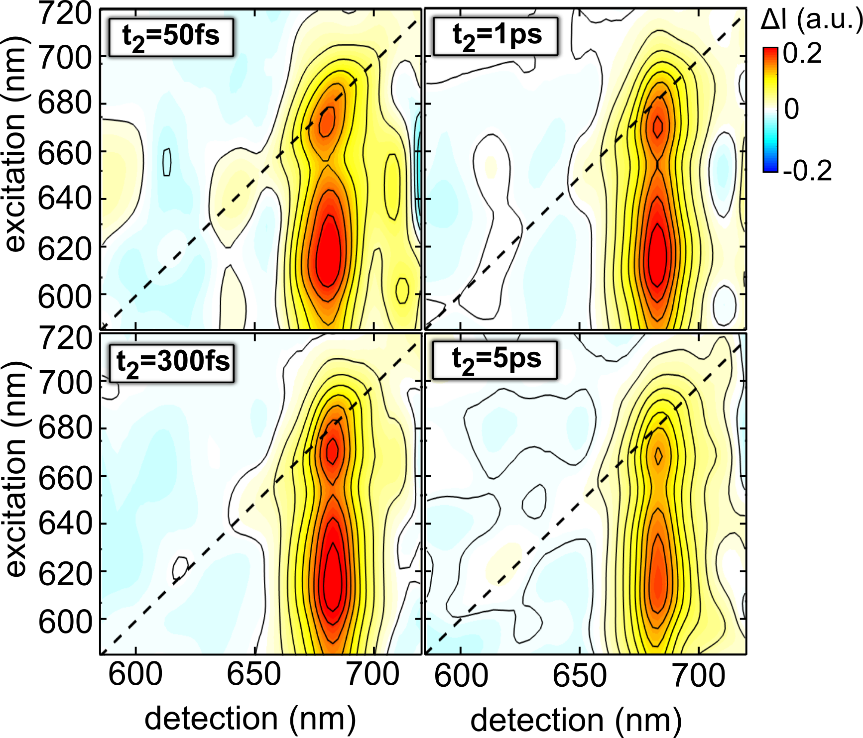
**

**Supplementary Fig. S16. 2DES results of *P. oceanica* PSI-LHCI-mega.** 2DES maps at four different waiting times: t2=50 fs, 300 fs, 1 ps, and 5 ps.

**
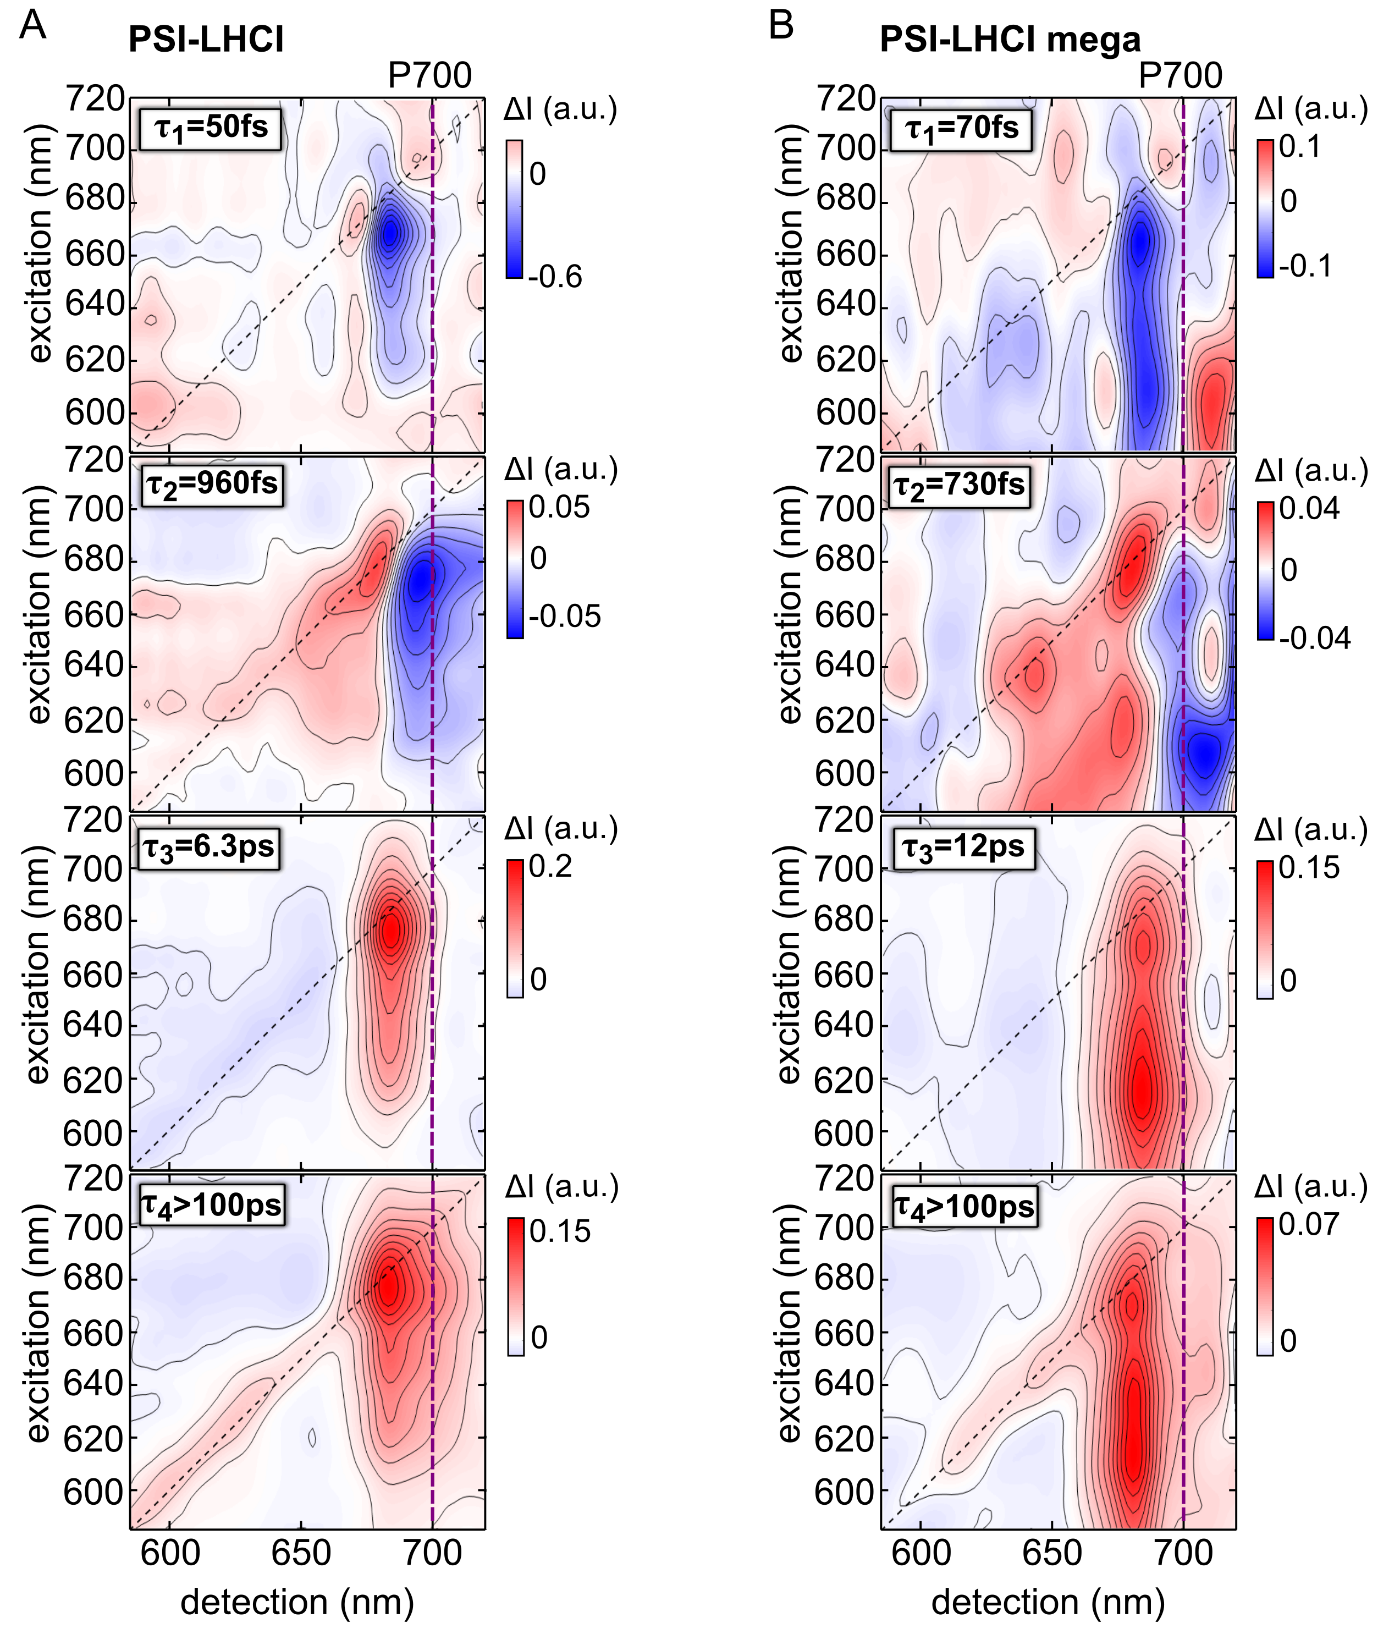
**

**Supplementary Fig. S17. 2DES global analysis results of *P. oceanica* complexes.** (**A**) 2D-DAS maps of PSI-LHCI; the temporal evolution can be described with four time constants: τ1= 50 fs, τ2=960 fs, τ3=6.3 ps, and a non-decaying component (limited by the temporal window adopted in the experiment). (**B**) 2D-DAS maps of PSI-LHCI-mega; the temporal evolution can be described with four time constants: τ1= 70 fs, τ2=730 fs, τ3=12 ps, and a non-decaying component (limited by the temporal window adopted in the experiment). The dashed violet line indicates the absorption of the P700 (700 nm).


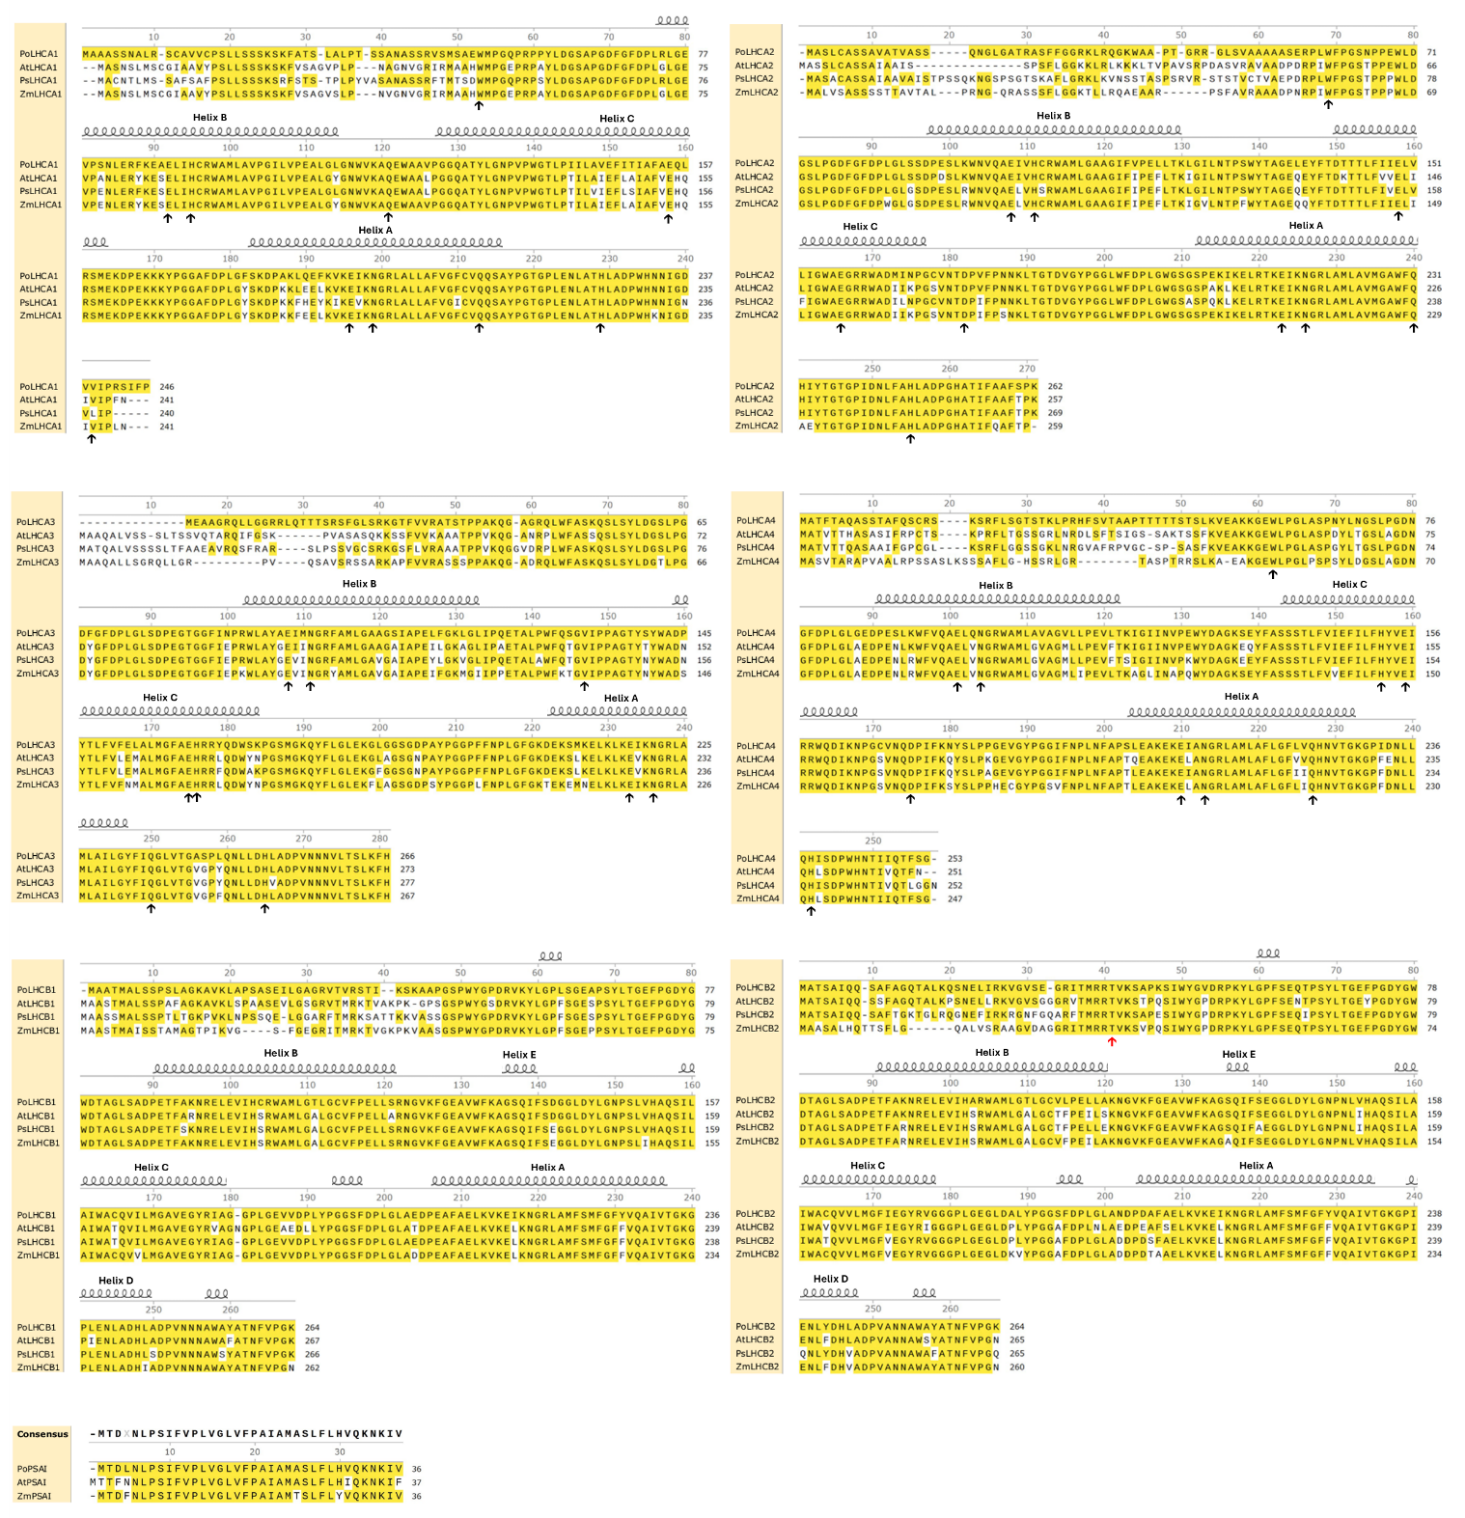


**Supplementary Fig. S18. Sequence alignments of LHCs and PSAI proteins.** The amino acid sequences of LHCA1, LHCA2, LHCA3, LHCA4, LHCB1, LHCB2, and PSAI from *P. oceanica (Po)*, *A. thaliana (At)*, *P. sativum* (*Po*) and *Z. mays (Zm)* were aligned with Clustal Omega (<https://www.ebi.ac.uk/jdispatcher/msa/clustalo>). Chl-binding residues of LHCI subunits are indicated with black arrowheads, while the phosphorylated Threonine in LHCB2 is indicated with a red arrowhead.


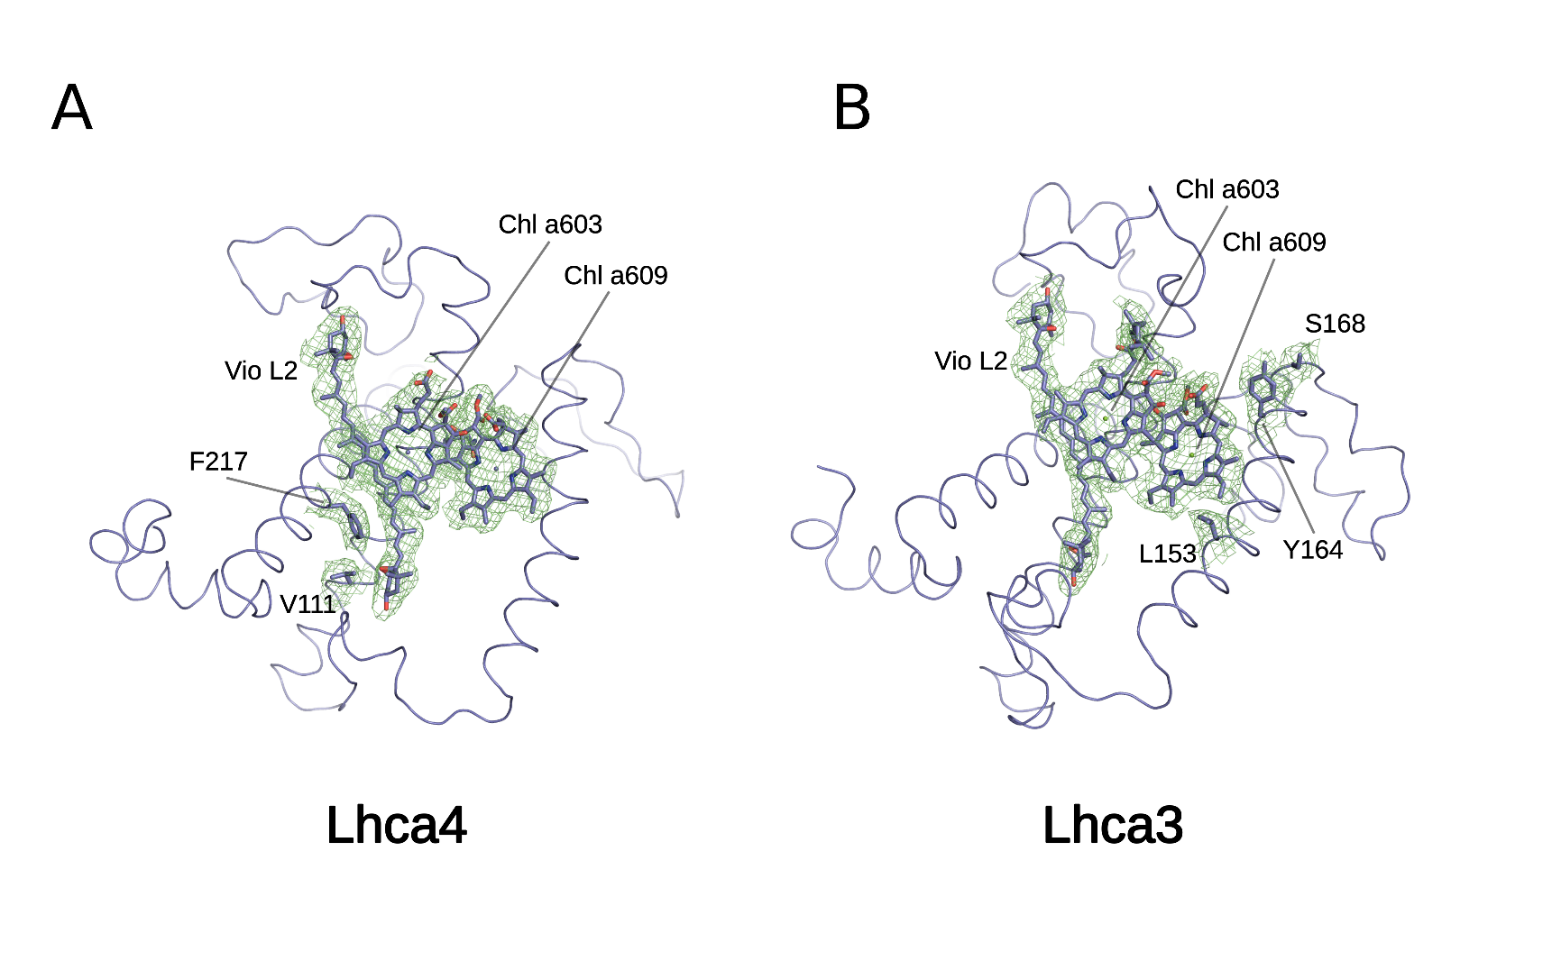


**Supplementary Fig. S19. Cryo-EM density of the chlorophyll (Chl) *a*603-*a*609 clusters in *P. oceanica* LHCA3 and LHCA4.** The pigments (*a*603, *a*609, and Violaxanthin (Vio) L2) and relevant side chains in Lhca4 (**A**) and Lhca3 (**B**) are shown in sticks and are surrounded by the density maps contoured at 3.5σ level.


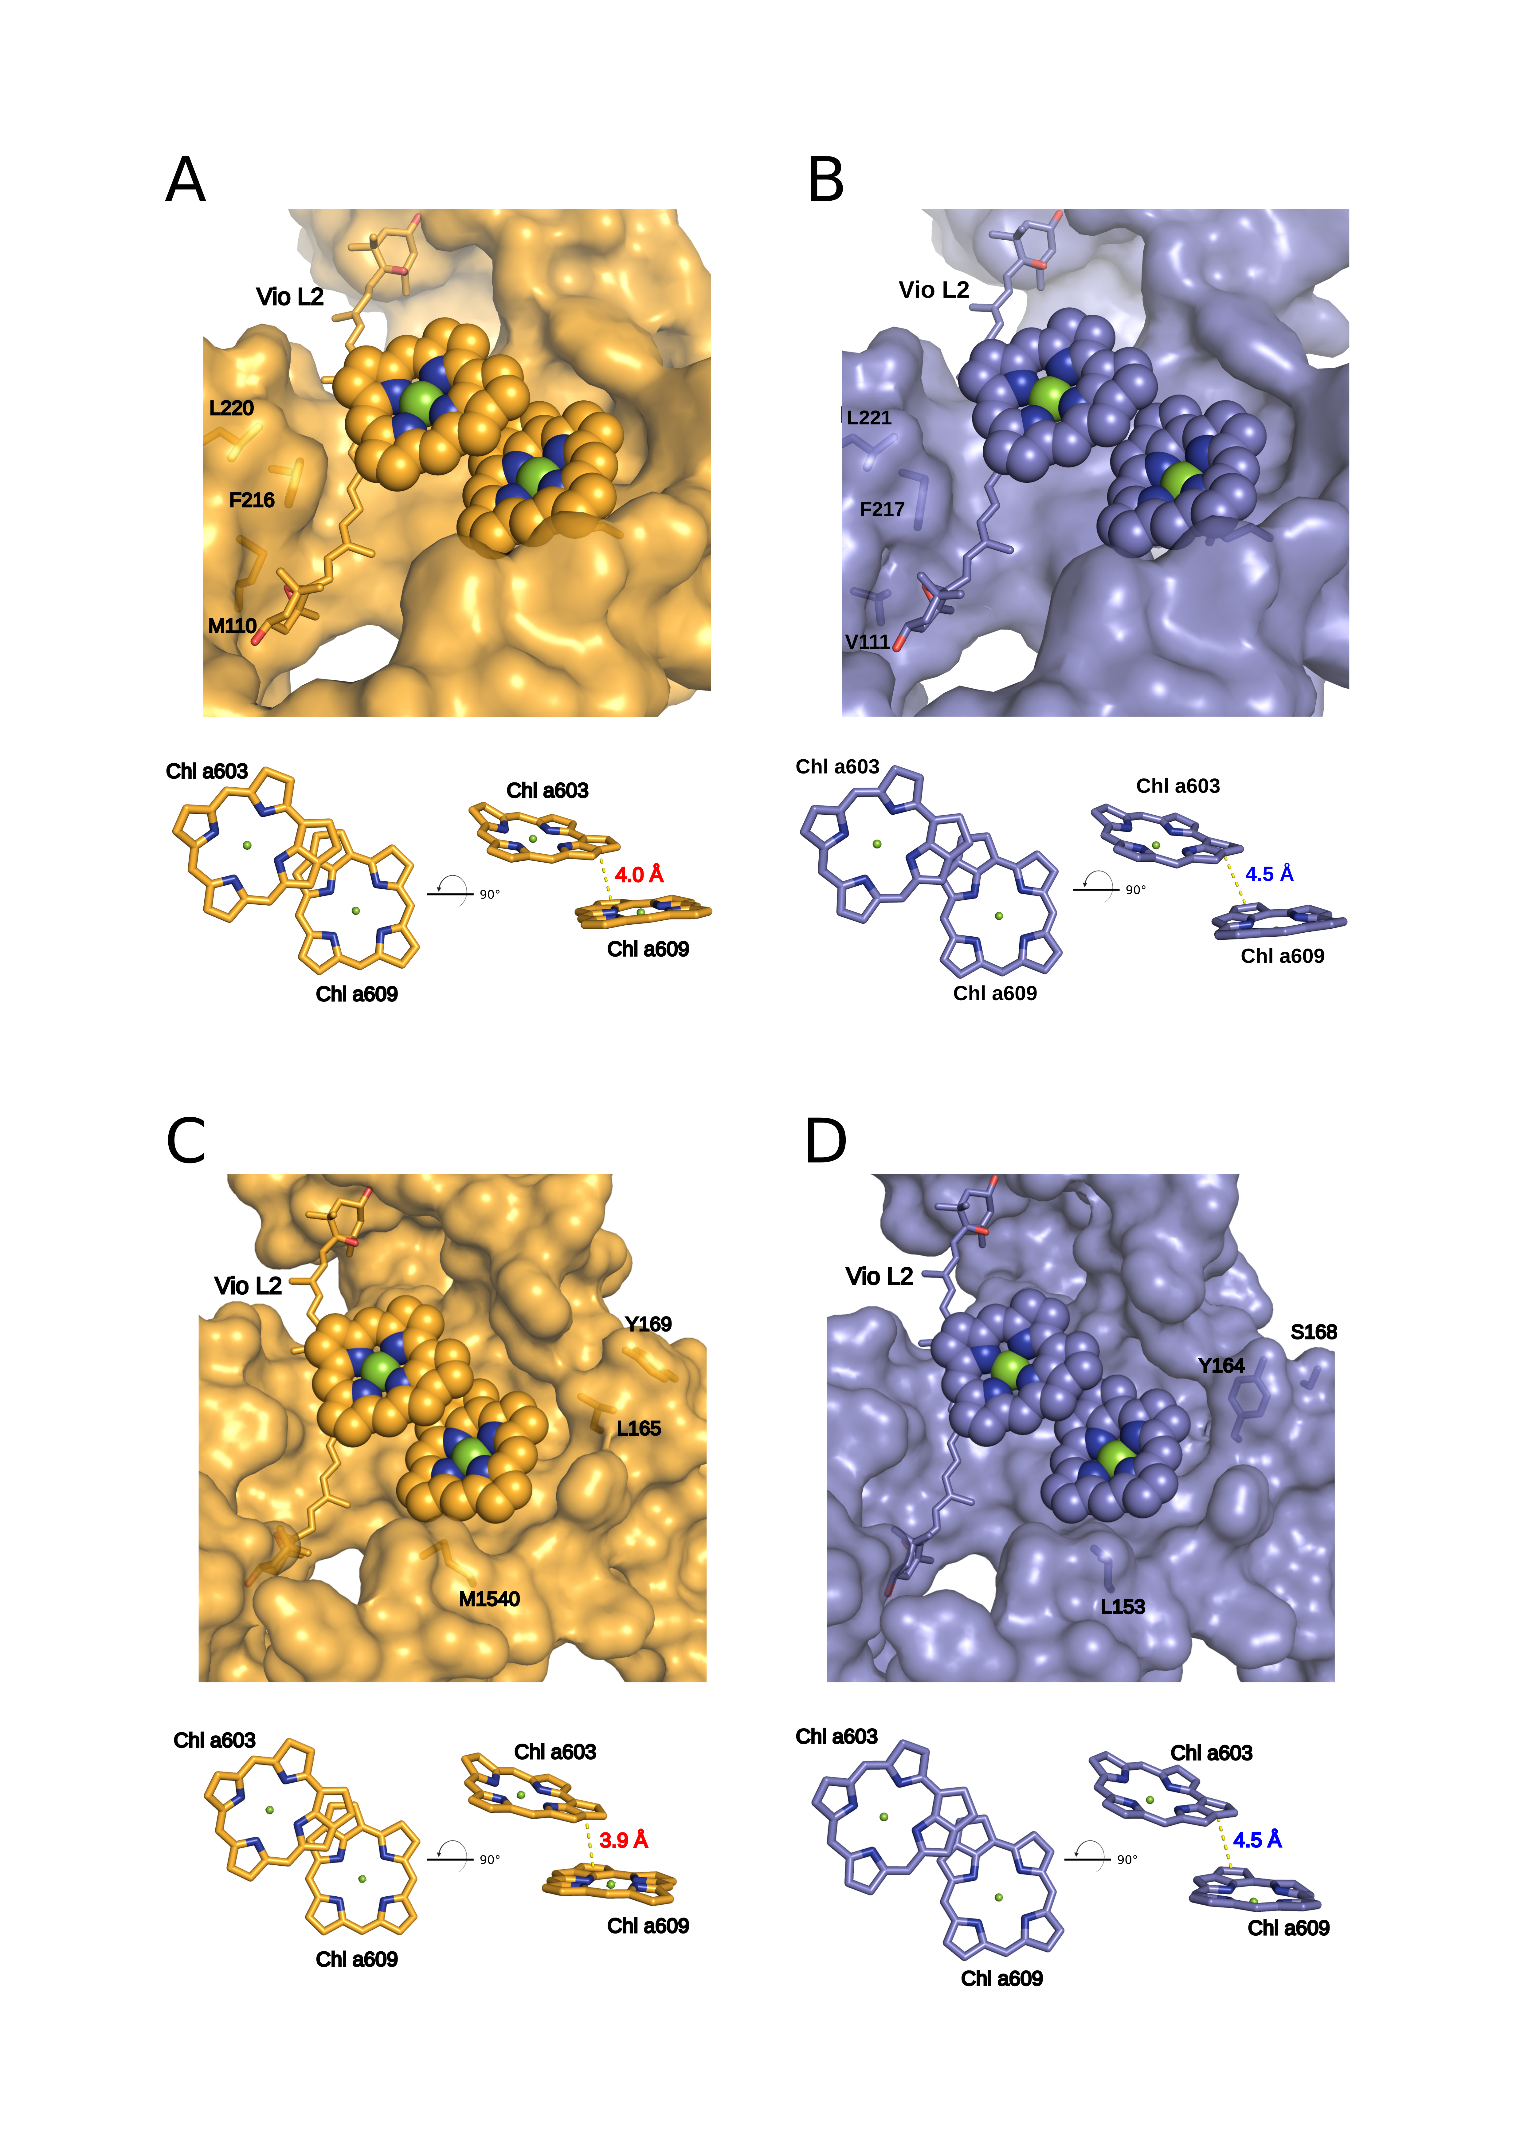


**Supplementary Fig. S20. Conformation of the low-energy Chl form cluster in *P. oceanica* and *Z. mays*.** Chlorine rings of the Chls *a*603 and *a*609 in *Z. mays* (orange) and *P. oceanica* (lavender) Lhca4 (**A-B**) and Lhca3 (**C-D**) are shown as spheres with van der Waals radius, Violaxanthin L2 and relevant side chains in sticks, and the protein surface in transparency. The relative position and orientation of the two Chl rings in the different structures are shown in the lower panels along with the distance between the E-ring centers of the two Chls.

| **PSI-LHCI** | ***A. thaliana* WT** (PDB: 9GBI) | ***Z. mays*** (PDB: 5ZJI) | ***P. oceanica*** (PDB: 9SIL) | ***A. thaliana* *a*603-NH** (PDB: 9GC2) |
| --- | --- | --- | --- | --- |
| **Lhca3** | **4.1 Å** | **3.9 Å** | **4.5 Å** | **4.5 Å** |
| **Lhca4** | **4.3 Å** | **4.0 Å** | **4.5 Å** | **4.8 Å** |
| **77K emission peaks** | **732 nm** | **736 nm** | **722 nm** | **721 nm** |

**Supplementary Fig. S21. Correlation between the E-ring overlap distance of Chls *a*603-*a*609 in Lhca3 and Lhca4 from PSI-LHCI Cryo-EM structures, with their 77K fluorescence emission peaks.** Distances (in Ångstroms, Å) were measured using PyMOL, as described for **Fig. S16**. 77K fluorescence emission data for PSI-LHCI are from **Fig. 1F**, with the maximum emission peak reported in nanometers (nm).


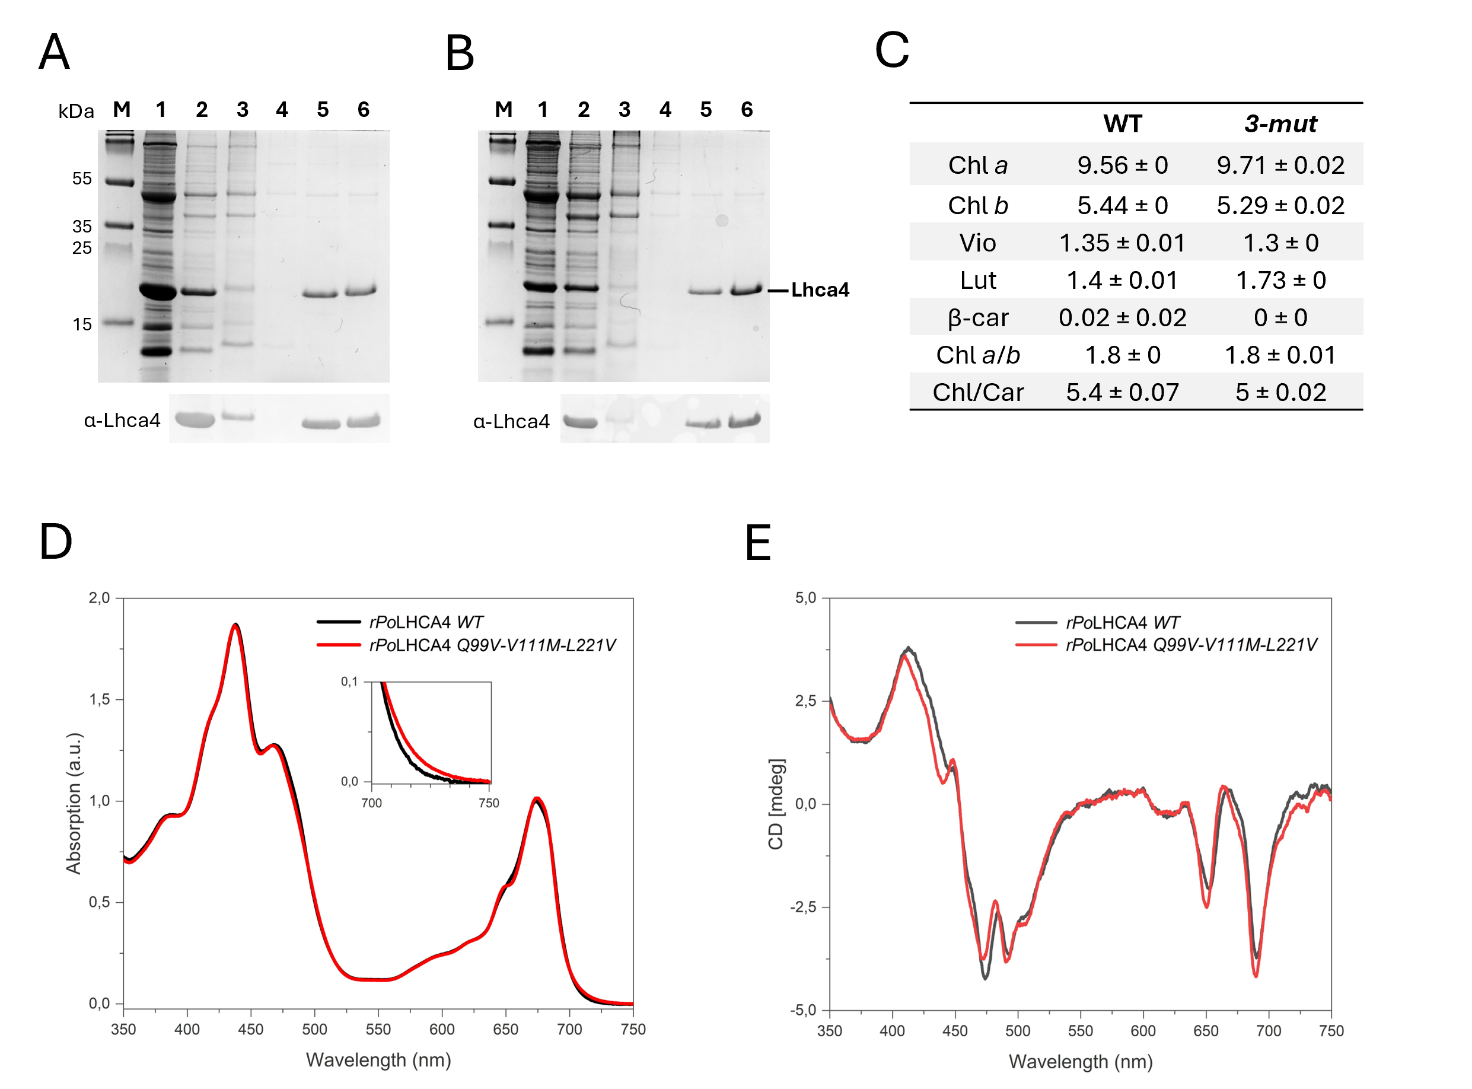


**Supplementary Fig. S22. Spectroscopic and biochemical characterization of *P. oceanica* (*Po*) recombinant (r) LHCA4 WT and Q99V-V111M-L221V mutant.** Recombinant proteins carry an N-terminal His-tag.(**A**) *rPo*LHCA4 WT and (**B**) *rPo*LHCA4 Q99V-V111M-L221V mutant, Coomassie-staining SDS-PAGE (top) and immunoblot (bottom) of fractions collected during protein purification. *Lane* *M: molecular weight marker; 1: inclusion bodies (IB) solubilized with 2% SDS; 2: IB solubilized with 2% LDS; 3: IMAC flow-through; 4: IMAC wash; 5: IMAC eluate; 6: sucrose gradient band.* (**C**) HPLC pigment quantification of rLHCA4 WT and Q99V-V111M-L221V mutant (*3-mut*), (n=3). Chl *a*, Chlorophyll *a*; Chl *b*, Chlorophyll *b*; Vio, Violaxanthin; Lut, Lutein; β-car, β-carotene. (**D**)Room-temperature absorption spectra normalized to the 550-750nm region. (**E**) Circular Dichroism (CD) spectra.


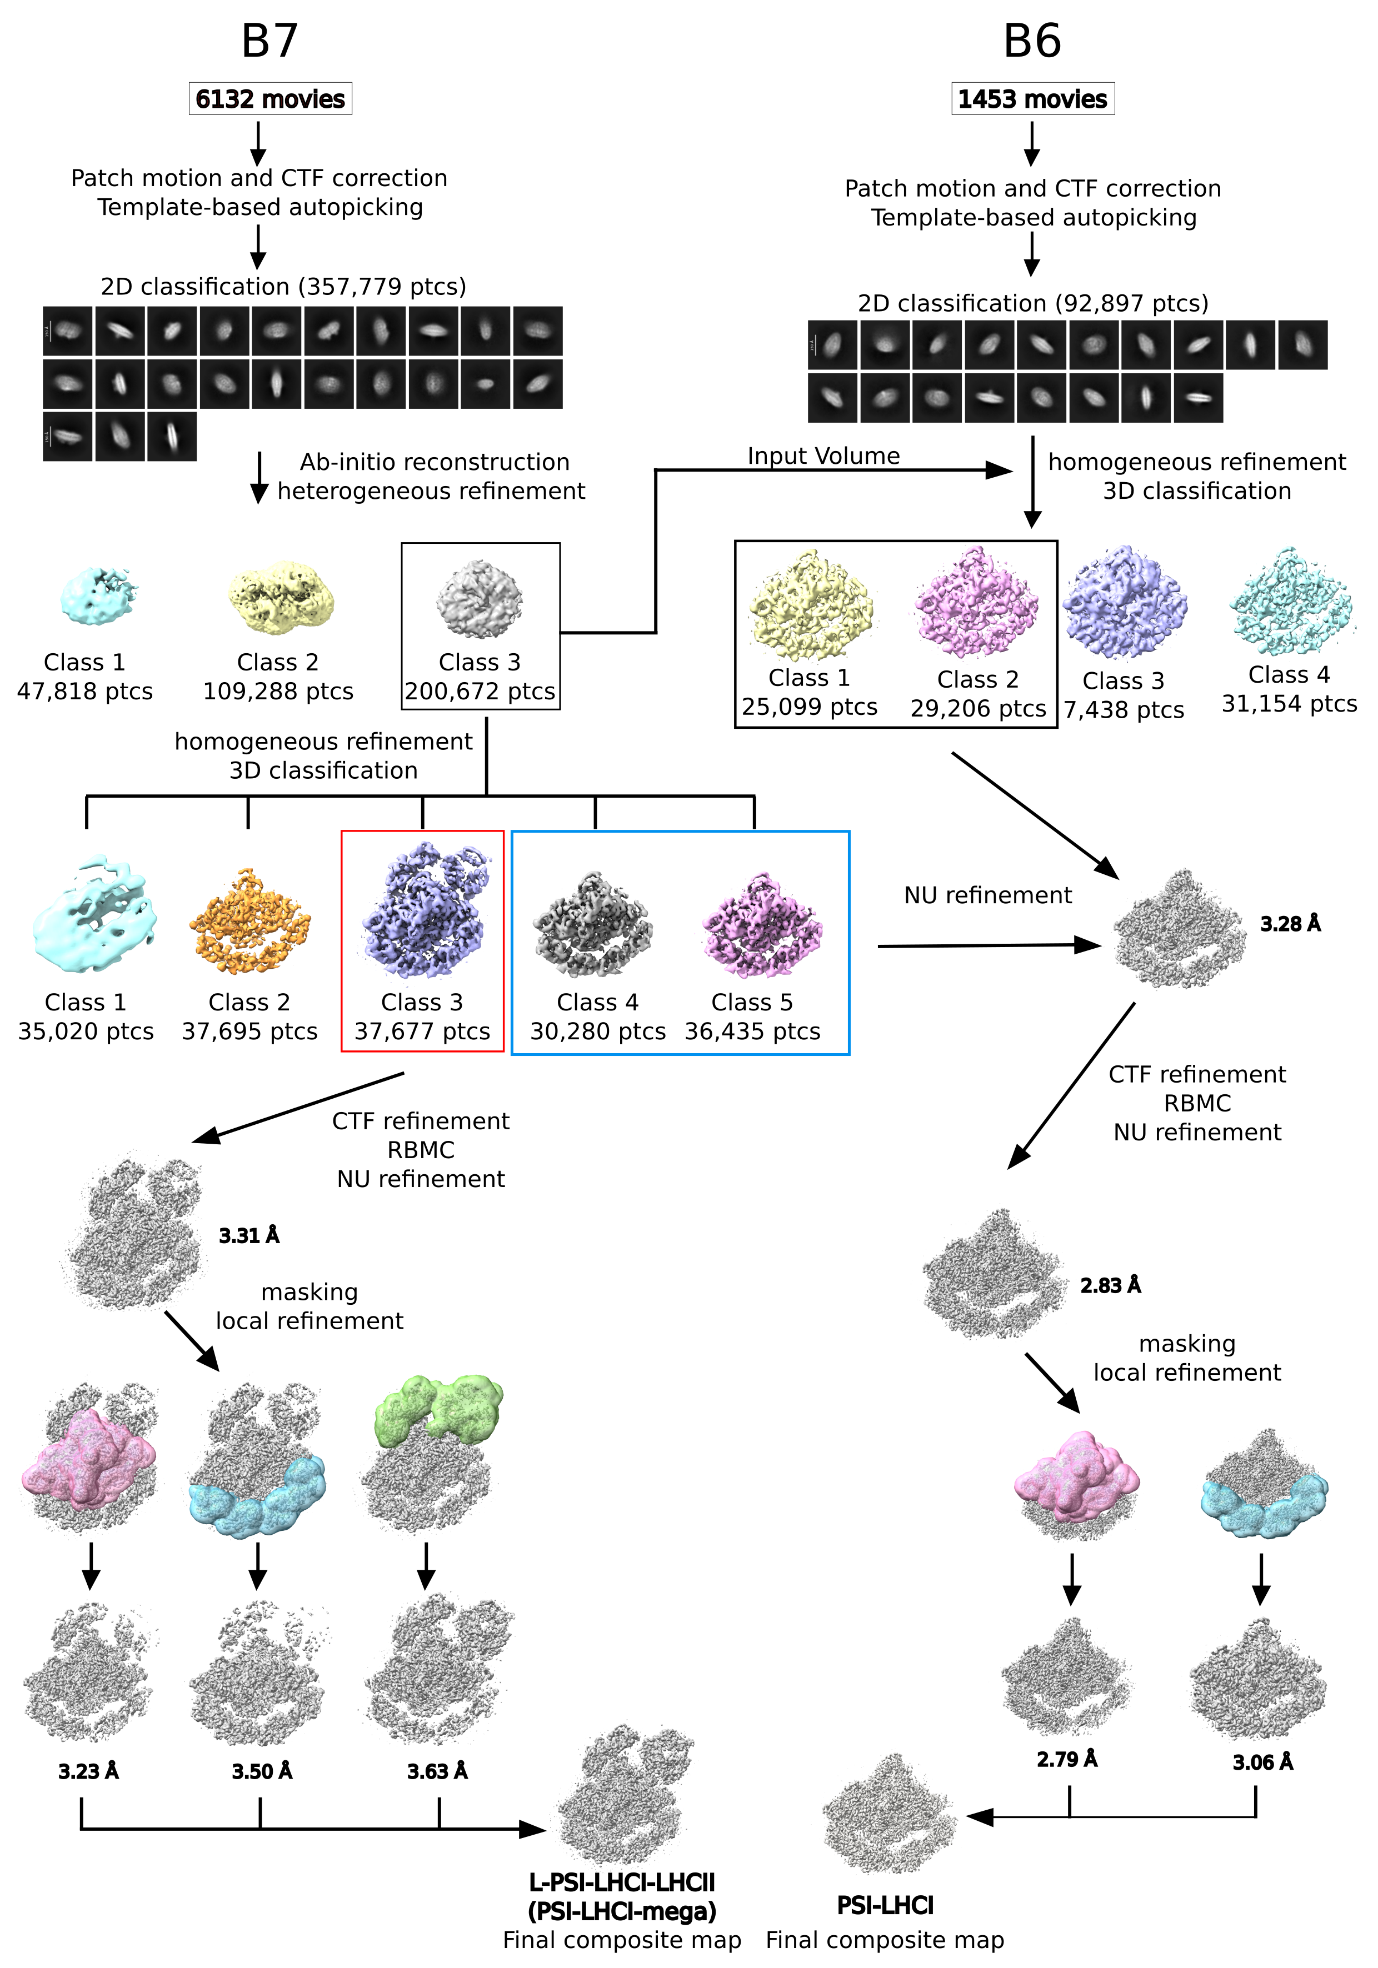


**Supplementary Fig. S23. Cryo-EM data processing workflow of *P. oceanica* samples.** B6 and B7 correspond to bands from **Fig. 1E** (*see Methods for details*).

**>*Po*LHCA1**MAAASSNALRSCAVVCPSLLSSSKSKFATSLALPTSSANASSRVSMSAEWMPGQPRPPYLDGSAPGDFGFDPLRLGEVPSNLERFKEAELIHCRWAMLAVPGILVPEALGLGNWVKAQEWAAVPGGQATYLGNPVPWGTLPIILAVEFITIAFAEQLRSMEKDPEKKKYPGGAFDPLGFSKDPAKLQEFKVKEIKNGRLALLAFVGFCVQQSAYPGTGPLENLATHLADPWHNNIGDVVIPRSIFP

**>*Po*LHCA2**MASLCASSAVATVASSQNGLGATRASFFGGRKLRQGKWAAPTGRRGLSVAAAAASERPLWFPGSNPPEWLDGSLPGDFGFDPLGLSSDPESLKWNVQAEIVHCRWAMLGAAGIFVPELLTKLGILNTPSWYTAGELEYFTDTTTLFIIELVLIGWAEGRRWADMINPGCVNTDPVFPNNKLTGTDVGYPGGLWFDPLGWGSGSPEKIKELRTKEIKNGRLAMLAVMGAWFQHIYTGTGPIDNLFAHLADPGHATIFAAFSPK

**>*Po*LHCA3**MEAAGRQLLGGRRLQTTTSRSFGLSRKGTFVVRATSTPPAKQGAGRQLWFASKQSLSYLDGSLPGDFGFDPLGLSDPEGTGGFINPRWLAYAEIMNGRFAMLGAAGSIAPELFGKLGLIPQETALPWFQSGVIPPAGTYSYWADPYTLFVFELALMGFAEHRRYQDWSKPGSMGKQYFLGLEKGLGGSGDPAYPGGPFFNPLGFGKDEKSMKELKLKEIKNGRLAMLAILGYFIQGLVTGASPLQNLLDHLADPVNNNVLTSLKFH

**>*Po*LHCA4**MATFTAQASSTAFQSCRSKSRFLSGTSTKLPRHFSVTAAPTTTTTSTSLKVEAKKGEWLPGLASPNYLNGSLPGDNGFDPLGLGEDPESLKWFVQAELQNGRWAMLAVAGVLLPEVLTKIGIINVPEWYDAGKSEYFASSSTLFVIEFILFHYVEIRRWQDIKNPGCVNQDPIFKNYSLPPGEVGYPGGIFNPLNFAPSLEAKEKEIANGRLAMLAFLGFLVQHNVTGKGPIDNLLQHISDPWHNTIIQTFSG

**>*Po*LHCB1**MAATMALSSPSLAGKAVKLAPSASEILGAGRVTVRSTIKSKAAPGSPWYGPDRVKYLGPLSGEAPSYLTGEFPGDYGWDTAGLSADPETFAKNRELEVIHCRWAMLGTLGCVFPELLSRNGVKFGEAVWFKAGSQIFSDGGLDYLGNPSLVHAQSILAIWACQVILMGAVEGYRIAGGPLGEVVDPLYPGGSFDPLGLAEDPEAFAELKVKEIKNGRLAMFSMFGFYVQAIVTGKGPLENLADHLADPVNNNAWAYATNFVPGK

**>*Po*LHCB2**MATSAIQQSAFAGQTALKQSNELIRKVGVSEGRITMRRTVKSAPKSIWYGVDRPKYLGPFSEQTPSYLTGEFPGDYGWDTAGLSADPETFAKNRELEVIHARWAMLGTLGCVLPELLAKNGVKFGEAVWFKAGSQIFSEGGLDYLGNPNLVHAQSILAIWACQVVLMGFIEGYRVGGGPLGEGLDALYPGGSFDPLGLANDPDAFAELKVKEIKNGRLAMFSMFGFYVQAIVTGKGPIENLYDHLADPVANNAWAYATNFVPGK

**>*Po*PSAA**MIIRSPEPEVKIVVDRDPVKTSFEEWARPGHFSRTIAKGPDTTTWIWNLHADAHDFDSHTSDLEEISRKVFSAHFGQLSIIFLWLSGMYFHGARFSNYEAWLSDPTHIGPSAQVVWPIVGQEILNGDVGGGFRGIQITSGFFQLWRASGITSELQLYCTAIGALVFASLMLFAGWFHYHKAAPKLAWFQDVESMLNHHLAGLLGLGSLSWAGHQIHISLPINQFLDAGVDPKEIPLPHEFILNRDLLAQLYPSFAEGATPFFTLNWSKYADFLTFRGGLDPITGGLWLSDIAHHHLAIAILFLIAGHMYRTNWGIGHGLKDILEAHKGPFTGQGHKGLYEILTTSWHAQLSLNLAMLGSLTIVVAHHMYSMPPYPYLAIDYGTQLSLFTHHMWIGGFLIVGAAAHAAIFMVRDYDPTTRYNDLLDRVLRHRDAIISHLNWACIFLGFHSFGLYIHNDTMSALGRPQDMFSDTAIQLQPIFAQWVQNTHALAPGTTAPGATASTSLTWGGGELVAVGGKVALLPIPLGTADFLVHHIHAFTIHVTVLILLKGVLFARSSRLIPDKANLGFRFPCDGPGRGGTCQVSAWDHVFLGLFWMYNAISVVIFHFSWKMQSDVWGTISDQGVVTHITGGNFAQSSITINGWLRDFLWAQASQVIQSYGSSLSAYGLFFLGAHFVWAFSLMFLFSGRGYWQELIESIVWAHNKLKVAPATQPRALSIVQGRAVGVTHYLLGGIATTWAFFLARIIAVG

**>*Po*PSAB**MALRFPRFSQGLAQDPTTRRIWFGIATAHDFESHDDITEERLYQNIFASHFGQLAIIFLWTSGNLFHVAWQGNFESWVQDPLHVRPIAHAIWDPHFGQPAVEAFTRGGALGPVNIAYSGVYQWWYTIGLRTNEDLYTGALFLLFLSAISLIAGWLHLQPKWKPSVSWFKNAESRLNHHLSGLFGVSSLAWTGHLVHVAIPASRGEYVRWNNFLDVLPYPQGLGPLFTGQWNLYAQNPDSGSHLFGTSQGAGTAILTLLGGFHPQTQSLWLTDIAHHHLAIAFIFLVAGHMYRTNFGIGHSIKDLLEAHIPPGGRLGRGHKGLYDTINNSIHFQLGLALASLGVVTSLVAQHMYSLPAYAFIAQDFTTQAALYTHHQYIAGFIMTGAFAHGAIFFIRDYNPEQNEDNVLARMLDHKEAIISHLSWASLFLGFHTLGLYVHNDVMLAFGTPEKQILIEPIFAQWIQSAHGKTSYGFDVLLSSTNGPAFNAGRNIWLPGWLNAVNENSNSLFLTIGPGDFLVHHAIALGLHTTTLILVKGALDARGSKLMPDKKDFGYSFPCDGPGRGGTCDISAWDAFYLAVFWMLNTIGWVTFYWHWKHITLWQGNVSQFNESSTYLMGWLRDYLWLNSSQLINGYNPFGMNSLSVWAWMFLFGHLVWATGFMFLISWRGYWQELIETLAWAHERTPLANLIRWRDKPVALSIVQARLVGLAHFSVGYIFTYAAFLIASTSGKFG

**>*Po*PSAC**MSHSVKIYDTCIGCTQCVRACPTDVLEMIPWDGCKAKQIASAPRTEDCVGCKRCESACPTDFLSVRVYLYHETTRSMALAY

**>*Po*PSAD** MASQASLFTPATLTPKLPATSSTTTPRTLAPWKSISTPKPLSLRTTRLSATQEATTEAPVGFTPPELDPNTPSPIFGGSTGGLLRKAQVEEFYVITWTSPKEQCLALGTRLRSKYKIDYQFYRVFPNGEVQYLHPKDGIYPEKVNAGRLGVGLNMRSIGKNVSPIEVKFTGKQPYDL

**>*Po*PSAE**MATSSMASAASSFVLPSAPPKNMTNLRISAVFFPKNNRWSHRGTVVVQAASGEETAPVAEEKRPAADPPAAAKPKPEKIGPKRGTKVKILRRESYWFNGVGSVVTVDQDPNSRYPVVVRFNKVNYNNVFTNNYAFDEILEVK

**>*Po*PSAF**MASLTTIPSSTLSKRLHHPKLHHSKLKPLTISCSSSITPSPQTPEASNNNNSQLKAFSAAVALSSILLSSPIVPPASADIAGLTPCKESKAFAKREKQSLKKLESSLKKYAPDSAPALAIKASMEKTKRRFDNYGKQGLLCGSDGLPHLIVSGDQRHWGEFITPGILFLYIAGWIGWVGRSYLIAIRDEKKPTMKEIIIDVPLASKLIWRGFIWPVAAYRELINGDLVVDDADVSVT

**>*Po*PSAG**MASSTIFSAPTLLRNNNSSTTTHLITPSHHSSFQGLRPLKPTDAFLIRASTTTTAPKSKAIRPAGVRAELNPQVVICLSTGLSLFLGRFVFFNFQRENVAKQGLPKQNGISHFEAGDERAKEYVGLLKSNDPVGFNIVDVLAWGSIGHIVAYYVLATSSNGYDPNFFG

**>*Po*PSAH** MALSLSIVASVQPVATVRGLGGSSLNGTKLAVRPQSRRMAPRTSLRSSRAVVAKYGDKSVYFDLEDLPNTTGQWDLYGSDAPSPYNSLQSKFFETFAAPFTKRGLLLKFLILGGGFTLAYYSSTASGDILPIKKGPQLPPELGPRDKK

**>*Po*PSAI** MTDLNLPSIFVPLVGLVFPAIAMASLFLHVQKNKIV

**>*Po*PSAJ** MRDIKTYLSVAPVLTTLWFGSLAGLLIEINRLFPDALSFPFF

**>*Po*PSAK**MATQLSSTATVMSLPQFIGLRTKPSMATLPVVRRQGRGALGARCGDFIGSSTNIIMVTTTSLMLFAGRFGLAPSANRKATAGLKLEVRDSGLQTGDPAGFTLADTLACGVVGHIMGVGIVLGLKSIGAI

**>*Po*PSAL**MATASASPMLKSGFHSGGLLAPRGISGSPLRALLPSKRRTCLTVRAIQAEKPTTFQVIEPINGDPFIGSLETPVTSSPLVAWYLSNLPAYRTAVSPLLRGIEVGLAHGYLLVGPFVITGPLRNTPYHGAAGSLAAGGLVVILSICLTMYGISSFKEGEPSCAPGLTLTGRKKEADKLQTADGWAQFTGGFFFGGISGVIWAYFLLYVLDLPYYIK

**>*Po*PSAO**MAAMATTSTTVAGLLPLSRPSTKASLSSGFIKTQVATRNPLSQKLASGGKFTCFERDWLRRDFNVIGFGLIGWLAPSSIPVIGGNSLTGLFFSSIGTELAHWPTGPALSSPFWLWMVTWHFGLFVCLTFGQIGFKGRNEGYF

**Supplementary Fig. S24. Amino acid sequences of the LHCI, LHCII, and PSI core subunits in the structure of PSI-LHCI and PSI-LHCI-mega complexes of *P. oceanica*.**

**Supplementary Table S1**. **Summarization of the structural models of *P. oceanica* PSI-LHCI supercomplex (PDB: 9S1L).**

| **Subunits** | **Residues** | **Chlorophylls** | **Carotenoids** | **Lipids** | **Others** |
| --- | --- | --- | --- | --- | --- |
| **PsaA** | 750 (27-750) | 46 Chl *a* | 6 β-car | 2 LHG; 1 LMT | 1 PQN; 1 SF4 |
| **PsaB** | 734 (2-734) | 40 Chl *a* | 8 β-car | 1 LHG; 2 LMT; 1 DGD | 1 PQN |
| **PsaC** | 81 (2-81) |  |  |  | 2 SF4 |
| **PsaD** | 203 (63-202) |  |  |  |  |
| **PsaE** | 142 (79-141) |  |  |  |  |
| **PsaF** | 237 (79-233) | 2 Chl *a* | 1 β-car | 2 LMG |  |
| **PsaG** | 168 (70-167) | 3 Chl *a* | 1 β-car | 2 LMG |  |
| **PsaH** | 148 (55-148) | 1 Chl *a* | 1 β-car |  |  |
| **PsaI** | 36 (3-34) |  | 1 β-car |  |  |
| **PsaJ** | 42 (2-41) | 1 Chl *a* | 1 β-car |  |  |
| **PsaK** | 129 (47-124) | 3 Chl *a* | 2 β-car |  |  |
| **PsaL** | 215 (62-213) | 3 Chl *a* | 3 β-car |  |  |
| **Lhca1** | 246 (49-243) | 12 Chl *a*; 2 Chl *b* | 2 Lut; 1 Vio; 1 β-car | 2 LHG; 1 LMG |  |
| **Lhca2** | 253 (55-252) | 9 Chl *a*; 5 Chl *b* | 1 Lut; 1 Vio; 2 β-car | 2 LMG; 1 LMT |  |
| **Lhca3** | 266 (48-260) | 12 Chl *a*; 1 Chl *b* | 1 Lut; 1 Vio; 1 β-car |  |  |
| **Lhca4** | 262 (56-258) | 11 Chl *a*; 4 Chl *b* | 1 Lut; 1 Vio; 2 β-car | 2 LMG; 1 LMT |  |
| **Total** |  | **155** | **39** | **20** | **5** |

β-car, β-carotene; Lut, Lutein; Vio, Violaxanthin; LHG, 1,2-dipalmitoyl-phosphatidyl-glycerole; LMG, 1,2 Distearoyl-Monogalactosyl-Diglyceride; LMT, β-Dodecyl-Maltoside; DGD; Digalactosyl-Diacyl-Glycerol; PQN phylloquinone; SF4, Fe2S2 iron-sulfur cluster.

**Supplementary Table S2**. **Summarization of the structural models of *P. oceanica* PSI-LHCI-mega complex (PDB: 9S1M).**

| **Subunits** | **Residues** | **Chlorophylls** | **Carotenoids** | **Lipids** | **Others** |
| --- | --- | --- | --- | --- | --- |
| **PsaA** | 750 (27-750) | 46 Chl *a* | 6 β-car | 2 LHG; 1 LMT | 1 PQN; 1 SF4 |
| **PsaB** | 734 (2-734) | 40 Chl *a* | 8 β-car | 1 LHG; 2 LMT; 1 DGD | 1 PQN |
| **PsaC** | 81 (2-81) |  |  |  | 2 SF4 |
| **PsaD** | 203 (63-202) |  |  |  |  |
| **PsaE** | 142 (79-141) |  |  |  |  |
| **PsaF** | 237 (79-233) | 2 Chl *a* | 1 β-car | 2 LMG |  |
| **PsaG** | 168 (70-167) | 3 Chl *a* | 1 β-car | 2 LMG |  |
| **PsaH** | 148 (55-148) | 1 Chl *a* | 1 β-car |  |  |
| **PsaI** | 36 (3-34) |  | 1 β-car |  |  |
| **PsaJ** | 42 (2-41) | 1 Chl *a* | 1 β-car |  |  |
| **PsaK** | 129 (47-126) | 4 Chl *a* | 2 β-car |  |  |
| **PsaL** | 215 (53-214) | 3 Chl *a* | 3 β-car |  |  |
| **PsaO** | 142 (50-138) | 3 Chl *a* | 2 β-car |  |  |
| **Lhca1** | 246 (49-246) | 12 Chl *a*; 2 Chl *b* | 2 Lut; 1 Vio; 1 β-car | 2 LHG; 1 LMG |  |
| **Lhca2** | 253 (56-258) | 9 Chl *a*; 5 Chl *b* | 1 Lut; 1 Vio | 1 LHG |  |
| **Lhca3** | 266 (48-260) | 12 Chl *a*; 1 Chl *b* | 1 Lut; 1 Vio; 1 β-car |  |  |
| **Lhca4** | 262 (55-252) | 11 Chl *a*; 4 Chl *b* | 1 Lut; 1 Vio; 2 β-car | 2 LMG; 1 LMT |  |
| **Lhca15** | 246 (49-243) | 12 Chl *a*; 2 Chl *b* | 2 Lut; 1 Vio; 1 β-car | 1 LHG; 1 LMG |  |
| **Lhca46** | 262 (55-252) | 11 Chl *a*; 4 Chl *b* | 1 Lut; 1 Vio; 2 β-car | 2 LMG; 1 LMT |  |
| **Lhcb1x** | 264 (46-263) | 8 Chl *a*; 6 Chl *b* | 2 Lut; 1 Vio; 1 Neo | 1 LHG |  |
| **Lhcb1y** | 264 (37-263) | 8 Chl *a*; 6 Chl *b* | 2 Lut; 1 Vio; 1 Neo | 1 LHG |  |
| **Lhcb2z** | 264 (46-263) | 8 Chl *a*; 6 Chl *b* | 2 Lut; 1 Vio 1 Neo | 1 LHG |  |
| **Total** |  | **230** | **59** | **26** | **5** |

β-car, β-carotene; Lut, Lutein; Vio, Violaxanthin; Neo, Neoxanthin; LHG, 1,2-dipalmitoyl-phosphatidyl-glycerole; LMG, 1,2 Distearoyl-Monogalactosyl-Diglyceride; LMT, β-Dodecyl-Maltoside; DGD; Digalactosyl-Diacyl-Glycerol; PQN phylloquinone; SF4, Fe2S2 iron-sulfur cluster.

**Supplementary Table S3.** **FRET rate of preferential Excitation Energy Transfer (EET) pathways in PSI-LHCI-mega.** To report only the strongest EET pathways, we used thresholds of <2 and <100 picoseconds (ps) for EET between Chls within the same subunit and between Chls belonging to different subunits, respectively. The protein chain subunits are indicated in parentheses.

|  | ***s-1*** | ***ps*** |
| --- | --- | --- |
| CLA606 (1) - CLA604 (1) | 6.7E+12 | 0.15 |
| CLA607 (1) - CLA606 (1) | 9.2E+11 | 1.09 |
| CLA611 (1) - CLA612 (1) | 2.6E+12 | 0.38 |
| CHL601 (1) - CLA611 (1) | 4.7E+11 | 2.13 |
| CLA609 (1) - CLA603 (1) | 4.3E+12 | 0.23 |
| CLA603 (1) - CLA602 (1) | 4.7E+11 | 2.13 |
| CLA613 (1) - CLA615 (4) | 1.0E+12 | 1.0 |
| CLA617 (1) - CLA615 (4) | 3.8E+11 | 2.63 |
| CHL601 (1) - CLA615 (4) | 4.8E+10 | 20.83 |
| CHL601 (1) - CHL616 (4) | 6.9E+10 | 14.49 |
| CLA606 (1) - CLA223 (G) | 7.0E+10 | 14.29 |
| CHL607 (1) - CLA223 (G) | 2.4E+11 | 4.17 |
| CLA617 (1) - CLA317 (F) | 6.5E+10 | 15.38 |
| CLA603 (1) - CLA821 (B) | 1.4E+11 | 7.14 |
| CLA603 (1) - CLA840 (B) | 2.6E+11 | 3.85 |
| CLA609 (1) - CLA820 (B) | 8.9E+10 | 11.24 |
| CLA603 (2) - CLA602 (2) | 5.6E+11 | 1.79 |
| CLA611 (2) - CLA612 (2) | 2.2E+12 | 0.45 |
| CLA603 (2) - CLA609 (2) | 4.9E+12 | 0.20 |
| CLA608 (2) - CLA609 (2) | 8.8E+11 | 1.14 |
| CLA606 (2) - CLA614 (4) | 2.5E+12 | 0.4 |
| CHL616 (2) - CLA601 (4) | 7.2E+10 | 13.89 |
| CHL616 (2) - CLA611 (4) | 5.3E+10 | 18.87 |
| CHL607 (2) - CLA102 (J) | 8.8E+10 | 11.36 |
| CLA614 (2) - CLA606 (3) | 6.1E+10 | 16.39 |
| CHL601 (2) - CLA615 (3) | 6.2E+10 | 16.13 |
| CLA606 (3) - CLA615 (3) | 2.1E+12 | 0.48 |
| CLA604 (3) - CLA605 (3) | 1.0E+12 | 1.0 |
| CLA604 (3) - CLA606 (3) | 8.2E+12 | 0.12 |
| CLA608 (3) - CLA609 (3) | 9.1E+11 | 1.10 |
| CLA609 (3) - CLA603 (3) | 3.8E+12 | 0.26 |
| CLA613 (3) - CLA202 (K) | 4.3E+10 | 23.26 |
| CLA602 (3) - CLA813 (A) | 4.6E+10 | 21.74 |
| CLA603 (3) - CLA811 (A) | 4.7E+10 | 21.28 |
| CLA603 (3) - CLA813 (A) | 7.8E+10 | 12.82 |
| CLA612 (4) - CLA612 (4) | 2.9E+12 | 0.35 |
| CHL616 (4) - CLA611 (4) | 3.9E+10 | 25.64 |
| CHL606 (4) - CLA614 (1) | 4.0E+10 | 25.00 |
| CHL607 (4) - CLA617 (1) | 4.5E+10 | 22.22 |
| CLA601 (4) - CLA609 (2) | 3.6E+10 | 27.78 |
| CLA602 (5) - CLA603 (5) | 3.7E+10 | 27.03 |
| CLA603 (5) - CLA609 (5) | 4.5E+12 | 0.22 |
| CLA608 (5) - CLA609 (5) | 1.1E+12 | 0.91 |
| CLA613 (5) - CLA615 (6) | 9.4E10 | 10.64 |
| CLA617 (5) - CLA615 (6) | 3.6E11 | 2.78 |
| CHL601 (5) - CLA615 (6) | 3.2E10 | 31.25 |
| CHL601 (5) - CHL616 (6) | 6.4E10 | 15.63 |
| CHL607 (5) - CHL605 (Y) | 8.0E09 | 125.00 |
| CLA601 (6) - CLA611 (6) | 1.5E+12 | 0.67 |
| CHL607 (6) - CLA609 (6) | 4.2E+10 | 23.81 |
| CLA603 (6) - CLA609 (6) | 3.9E+12 | 0.26 |
| CLA603 (6) - CLA615 (6) | 4.4E+10 | 22.73 |
| CLA611 (6) - CLA612 (6) | 2.3E+12 | 0.44 |
| CHL607 (6) - CLA617 (5) | 5.6E+10 | 17.86 |
| CHL606 (6) - CLA614 (5) | 3.8E+10 | 26.32 |
| CHL616 (6) - CLA611 (5) | 3.3E+10 | 30.30 |
| CLA209 (H) - CLA602 (5) | 1.6E10 | 62.50 |
| CLA209 (H) - CLA603 (5) | 1.8E10 | 55.56 |
| CLA209 (H) - CLA306 (L) | 4.5E+11 | 2.22 |
| CLA102 (J) - CLA808 (A) | 1.3E+10 | 76.92 |
| CLA102 (J) - CLA316 (F) | 4.5E+10 | 22.22 |
| CLA306 (L) - CLA307 (L) | 5.5E+11 | 1.82 |
| CLA307 (L) - CLA834 (A) | 1.7E+11 | 5.88 |
| CLA307 (L) - CLA843 (A) | 2.6E+11 | 3.85 |
| CLA200 (O) - CLA834 (A) | 2.2E+10 | 45.45 |
| CLA200 (O) - CLA839 (A) | 1.5E+10 | 66.67 |
| CLA203 (O) - CLA823 (A) | 1.1E11 | 9.09 |
| CLA203 (O) - CLA824 (A) | 1.0E11 | 10.00 |
| CLA203 (O) - CLA825 (A) | 3.8E10 | 26.32 |
| CLA204 (O) - CLA857 (A) | 2.3E10 | 43.48 |
| CHL606 (Y) - CHL604 (Y) | 5.3E+12 | 0.19 |
| CHL606 (Y) - CHL607 (Y) | 1.5E+12 | 0.67 |
| CHL609 (Y) - CLA603 (Y) | 1.5E+12 | 0.67 |
| CHL605 (Y) - CLA606 (5) | 2.0E10 | 50.00 |
| CLA614 (Y) - CLA204 (O) | 6.4E+10 | 15.63 |
| CLA611 (Y) - CLA203 (O) | 1.3E+10 | 76.92 |
| CHL601 (Y) - CLA203 (O) | 2.2E10 | 45.45 |
| CLA603 (Y) - CLA614 (X) | 1.7E+12 | 0.59 |
| CHL606 (Y) - CHL601 (X) | 9.4E+9 | 106.4 |
| CLA602 (Y) - CLA603 (Z) | 6.6E+10 | 15.15 |
| CHL601 (Y) - CHL609 (Z) | 1.5E+10 | 66.67 |
| CLA613 (Y) - CLA603 (Z) | 2.6E+10 | 38.46 |
| CHL601 (Y) - CHL605 (Z) | 1.4E+10 | 71.43 |
| CLA611 (X) - CLA612 (X) | 4.7E+12 | 0.213 |
| CHL609 (X) - CLA603 (X) | 1.1E+12 | 0.91 |
| CHL607 (X) - CHL606 (X) | 2.1E+12 | 0.48 |
| CHL606 (X) - CLA604 (X) | 6.8E+12 | 0.15 |
| CLA602 (X) - CLA603 (Y) | 6.3E+10 | 15.87 |
| CHL601 (X) - CHL608 (Y) | 1.1E+10 | 90.91 |
| CLA614 (X) - CLA603 (Y) | 1.7E+10 | 58.82 |
| CLA609 (X) - CLA602 (Z) | 2.2E+10 | 45.45 |
| CHL606 (Z) - CHL607 (Z) | 2.0E+12 | 0.50 |
| CLA611 (Z) - CLA612 (Z) | 3.0E+12 | 0.33 |
| CLA602 (Z) - CLA603 (X) | 7.3E+10 | 13.70 |
| CLA613 (Z) - CLA603 (X) | 2.4E+10 | 41.67 |
| CHL601 (Z) - CHL608 (X) | 1.5E+10 | 66.67 |

**Supplementary Table S4. Cryo-EM data collection, refinement, and validation statistics.**

|  | **PSI-LHCI**  (EMD-54455,  EMD-54379a,  PDB 9S1L) | **L-PSI-LHCI-LHCII**  (EMD-54456,  EMD-54439a,  PDB 9S1M) | **PSI-LHCI**  **PSI core**  (EMD-54380)b | **PSI-LHCI**  **LHCI belt**  (EMD-54396)c | **L-PSI-LHCI-LHCII**  **PSI core**  (EMD-54441)d | **L-PSI-LHCI-LHCII**  **LHCI belt**  (EMD-54443)e | **L-PSI-LHCI-LHCII**  **Lhca15-46-LHCII**  (EMD-54444)f |
| --- | --- | --- | --- | --- | --- | --- | --- |
| **Data collection and processing** |  |  |  |  |  |  |  |
| Magnification | 130,000X | 130,000X | 130,000X | 130,000X | 130,000X | 130,000X | 130,000X |
| Voltage (kV) | 200 | 200 | 200 | 200 | 200 | 200 | 200 |
| Total electron dose (e-/Å) | 45 | 45 | 45 | 45 | 45 | 45 | 45 |
| Nominal defocus range （µm） | -0.75 – -2.5 | -0.75 – -2.5 | -0.75 – -2.5 | -0.75 – -2.5 | -0.75 – -2.5 | -0.75 – -2.5 | -0.75 – -2.5 |
| Pixel size （Å） | 0.92 | 0.92 | 0.92 | 0.92 | 0.92 | 0.92 | 0.92 |
| Number of particles in final reconstruction | 120603 | 37677 | 120603 | 120603 | 37677 | 37677 | 22405 |
| Symmetry imposed | C1 | C1 | C1 | C1 | C1 | C1 | C1 |
| Map resolution (Å) | 2.83 | 3.31 | 2.79 | 3.06 | 3.23 | 3.5 | 3.63 |
| Map sharpening B factor (Å2) | 74.5 | 62.8 | 71.9 | 82.1 | 58.8 | 55.9 | 51.3 |
| **Model Refinement and Validation** |  |  |  |  |  |  |  |
| Initial model used (PDB code) | 5ZJI | 9S1L and 5ZJI |  |  |  |  |  |
| Model composition |  |  |  |  |  |  |  |
| *Protein residues* | 3174 | 4358 |  |  |  |  |  |
| *Ligands* | 215 | 318 |  |  |  |  |  |
| R.m.s. deviations |  |  |  |  |  |  |  |
| *Bond lengths (Å)* | 0.003 | 0.004 |  |  |  |  |  |
| *Bond angles (°)* | 0.631 | 0.650 |  |  |  |  |  |
| MolProbity score | 1.45 | 1.70 |  |  |  |  |  |
| Clash score | 5.29 | 8.45 |  |  |  |  |  |
| Rotamers outliers (%) | 0.93 | 0.91 |  |  |  |  |  |
| Ramachandran plot |  |  |  |  |  |  |  |
| *Favored (%)* | 97.1 | 96.4 |  |  |  |  |  |
| *Allowed (%)* | 2.9 | 3.6 |  |  |  |  |  |
| *Disallowed (%)* | 0 | 0 |  |  |  |  |  |
| Mean B factor (Å2) |  |  |  |  |  |  |  |
| *Protein* | 68.07 | 100.15 |  |  |  |  |  |
| *Ligands* | 64.04 | 93.10 |  |  |  |  |  |
| CC (model vs data) |  |  |  |  |  |  |  |
| *Mask* | 0.83 | 0.85 |  |  |  |  |  |
| *Box* | 0.68 | 0.75 |  |  |  |  |  |

a) The two EMDB codes belong to the combined and original map, respectively. b) Focused map of PSI core of PSI-LHCI complex. c) Focused map of the LHCI belt of the PSI-LHCI complex. d) Focused map of the PSI core of the L-PSI-LHCI-LHCII complex. e) Focused map of the LHCI belt of L-PSI-LHCI-LHCII. f Focused map of Lhca15-Lhca46-LHCII of L-PSI-LHCI-LHCII complex. L-PSI-LHCI-LHCII refers to PSI-LHCI-mega.

**Supplementary Data S1.** *(separate file)*FRET rates of EET pathways in PSI-LHCI-mega.

**Supplementary References**

1. Ritchie, R. J., Larkum, A. W. D. & Ribas, I. Could photosynthesis function on Proxima Centauri b? *Int J Astrobiol* 17, 147–176 (2018).
