# Supplementary material for: Back to the Seabed: The Unique Photosystem I Architecture of the Seagrass Posidonia oceanica
Source: Research Square preprint supplement (doi:10.21203/rs.3.rs-8575725/v1), 2026-02-05
Supplement: Supplementary file 2 [file c30270945efb18df11f30d04.xlsx]

## Sheet: Sheet1
	CHL601_1	CLA602_1	CLA603_1	CLA604_1	CLA606_1	CHL607_1	CLA608_1	CLA609_1	CLA610_1	CLA611_1	CLA612_1	CLA613_1	CLA614_1	CLA617_1	CHL601_2	CLA602_2	CLA603_2	CLA604_2	CHL606_2	CHL607_2	CHL608_2	CLA609_2	CLA610_2	CLA611_2	CLA612_2	CLA613_2	CLA614_2	CHL616_2	CLA602_3	CLA603_3	CLA604_3	CLA605_3	CLA606_3	CLA607_3	CHL608_3	CLA609_3	CLA610_3	CLA612_3	CLA613_3	CLA614_3	CLA615_3	CLA601_4	CLA602_4	CLA603_4	CLA604_4	CHL606_4	CHL607_4	CHL608_4	CLA609_4
CHL601_1		3.18988e+11	4.31287e+09	3.11284e+07	1.23321e+08	7.79552e+08	6.07804e+08	1.75566e+09	4.28037e+09	4.69149e+11	2.42742e+10	1.20262e+10	6.91251e+09	2.63252e+09	418927	509833	2.34013e+06	1.08339e+06	1.13932e+06	2.74473e+06	2.8645e+06	121377	82579.6	70835.5	5092.29	3.02415e+06	360110	9.55833e+06	54749.3	807272	31562.7	17067.7	242723	703861	559947	434170	251807	49926.4	243445	58.1142	1.43104e+06	8.51747e+07	4.61714e+08	6.41106e+07	3.82621e+08	1.09608e+08	4.30322e+08	1.34041e+09	1.17915e+10
CLA602_1	7.56551e+10		4.7364e+11	3.33547e+07	2.77561e+09	1.22059e+09	2.00238e+10	7.97382e+10	7.35133e+10	1.14829e+11	8.07472e+10	1.05071e+10	1.10775e+09	2.28228e+09	147991	1.8984e+06	771313	687233	7513.04	669626	34675.9	510704	21666.4	8954.73	267499	4.08929e+06	634737	1.42936e+06	2636.07	918834	53654.7	112291	198221	1.39465e+06	51273.4	242161	217559	14734.5	534788	6764.28	1.44234e+06	6.81939e+07	2.8345e+08	6.42415e+07	5.57326e+07	2.29104e+06	4.5491e+07	6.58979e+07	2.60539e+09
CLA603_1	1.01047e+09	4.67885e+11		2.18264e+09	4.89759e+09	8.6702e+08	5.34118e+10	4.22596e+12	5.82219e+10	8.0934e+09	6.90239e+09	4.85687e+09	9.38275e+08	5.0771e+08	143713	1.35108e+06	1.35266e+06	5.00614e+06	309710	12471.2	13529	3.23787e+06	2.10728e+06	254548	511.658	668342	1.91274e+06	367158	4183.88	50319.5	735256	203362	920984	251091	53771.4	28836	13198.6	105072	101964	263248	5721.6	3.02901e+07	8.779e+07	3.91686e+08	1.14514e+08	344033	2.74112e+06	2.3383e+07	1.21566e+09
CLA604_1	7.3914e+06	3.33935e+07	2.21206e+09		6.69264e+12	2.57686e+10	1.61729e+10	1.83225e+08	1.34571e+10	4.22438e+06	8.83262e+09	3.44123e+07	6.09379e+09	1.54703e+08	78670.5	1.68297e+06	1.30746e+06	1.18984e+06	675795	501410	598721	3.48197e+06	351949	681921	1.4914e+06	145305	2688.55	363769	472508	103798	31907.5	207880	376784	273872	59589.8	587910	75721.9	283910	125153	5192.92	88250	1.71823e+06	1.19228e+07	778729	1.18429e+08	5.56522e+07	2.48068e+07	2.151e+07	4.4791e+07
CLA606_1	2.91666e+07	2.76785e+09	4.94398e+09	6.66619e+12		2.18546e+11	1.21202e+11	9.51299e+10	1.11766e+08	6.34964e+08	7.50529e+09	4.05548e+08	5.62553e+08	2.71552e+08	124226	2.04884e+06	502515	203288	305323	598279	270822	2.74861e+06	310405	479677	1.15811e+06	935261	139015	545326	298709	4704.31	170.755	258044	82031.6	742695	12292.1	205618	5546.35	138548	335621	14795.9	14621.8	7.62669e+06	2.74809e+07	5.70092e+06	1.98885e+07	2.05241e+07	2.13957e+07	1.40895e+07	1.0665e+08
CHL607_1	7.79408e+08	5.14547e+09	3.69993e+09	1.08503e+11	9.23875e+11		6.24814e+09	3.92212e+10	1.23828e+08	4.46993e+08	3.75712e+09	1.09269e+10	5.12034e+07	2.42905e+09	295225	617766	330030	323149	1.14346e+06	4.15897e+06	180082	116116	58472.4	11578.4	426347	1.41971e+06	3843.04	2.64864e+06	31951.2	254080	38361.8	40557.3	40735.1	706738	40.1153	3492.84	79848.8	30624.7	286056	11798.5	525001	5.70747e+06	1.98722e+07	4.82886e+06	7.12619e+06	6.756e+07	2.09126e+08	2.63058e+07	4.98332e+07
CLA608_1	1.43809e+08	1.99759e+10	5.39392e+10	1.61154e+10	1.2125e+11	1.47861e+09		1.54996e+12	3.82533e+11	3.90012e+09	1.94683e+10	27770.1	9.79448e+06	2.67071e+07	138380	1.84321e+06	571040	198589	28425	273789	92004	2.56747e+06	700662	394787	506078	884221	522226	526244	111462	27126.1	89926.7	241551	27194	567106	285.726	46081.3	4551.3	14211.2	264828	71273.6	11224.5	1.30125e+07	3.9458e+07	3.18647e+07	159558	5.61283e+06	8.14925e+06	1.65172e+07	1.9672e+08
CLA609_1	4.14852e+08	7.9443e+10	4.2621e+12	1.82334e+08	9.50433e+10	9.26947e+09	1.54793e+12		8.32989e+10	3.8481e+09	8.84518e+09	9.76526e+07	2.44165e+08	7.43871e+07	97734.3	994839	3978.67	1.20375e+06	43668.2	147476	8929.17	793950	331728	56752.7	52167.9	1.45292e+06	764198	395044	1537.27	310941	193608	119878	322727	620324	36332.2	82323.3	32415	32393.9	267759	62027.9	271641	1.83398e+07	4.86156e+07	4.86087e+07	2.48152e+07	83367.3	5.78674e+06	7.17613e+06	2.91281e+08
CLA610_1	1.01723e+09	7.36613e+10	5.90567e+10	1.34685e+10	1.12305e+08	2.94333e+07	3.84225e+11	8.37768e+10		5.84506e+10	2.30796e+11	2.57155e+08	1.94512e+09	2.12411e+07	23372	97441	1717.14	2.62389e+06	307325	3140.38	133132	93886.2	346771	11.1928	124101	338515	664754	81814.2	73377.5	133927	290887	22036.3	573277	70200	57322.2	172946	11606	135398	29112.2	66542.1	57870.4	1.06759e+07	2.26169e+07	7.02423e+07	1.04526e+08	5.64267e+06	3226.51	2.26826e+06	2.41553e+08
CLA611_1	1.11324e+11	1.14885e+11	8.19694e+09	4.22153e+06	6.37053e+08	1.06086e+08	3.91139e+09	3.86429e+09	5.83616e+10		2.59623e+12	1.27917e+08	7.46758e+09	1.14004e+08	184916	2.30632e+06	196434	2.70729e+06	60960.8	335774	132.87	3.24412e+06	1.31157e+06	237460	218159	2.12044e+06	1.31378e+06	1.75618e+06	1919.29	229012	267835	212895	365597	699793	35337.4	35598.2	13141.5	20176.6	271309	83220.5	199942	8.06379e+07	3.1846e+08	3.812e+08	2.60594e+08	9.78671e+06	4.10224e+07	5.27739e+08	4.51548e+09
CLA612_1	5.6886e+09	7.97853e+10	6.90406e+09	8.71727e+09	7.43666e+09	8.80634e+08	1.92826e+10	8.7723e+09	2.27589e+11	2.56405e+12		1.08948e+10	1.9498e+07	7.66071e+08	142938	2.15984e+06	9069.6	35043.3	89605.1	685881	79098.4	2.06265e+06	233741	222596	818599	2.17247e+06	379859	1.3784e+06	58746.2	209567	15744.5	189035	7046.44	928555	2399.27	185.738	29060.4	14449	378667	11902.4	329219	3.43526e+07	1.30429e+08	3.17741e+07	25927.7	4.39605e+07	5.48502e+07	1.18346e+08	9.38644e+08
CLA613_1	2.86204e+09	1.0543e+10	4.9334e+09	3.44897e+07	4.08073e+08	2.60091e+09	27931.9	9.83504e+07	2.57514e+08	1.28291e+08	1.10638e+10		7.94382e+10	2.03705e+11	36015.3	444285	1.46182e+07	4.48919e+06	149467	485520	325661	1.10762e+07	6.71786e+06	1.17181e+06	9537.97	2.19864e+06	1.01902e+06	41727	82002	1.18219e+06	650584	155843	212117	472187	8023.66	601108	758983	1435.56	155153	346970	3.26997e+06	3560.23	26190.6	1.85536e+09	1.10597e+08	2.9574e+07	1.15407e+08	1.28499e+08	1.56354e+09
CLA614_1	1.64583e+09	1.11205e+09	9.53507e+08	6.11037e+09	5.66322e+08	1.21935e+07	9.85616e+06	2.46025e+08	1.94875e+09	7.49295e+09	1.98098e+07	7.94753e+10		1.7939e+08	87696.6	2.90384e+06	6.27488e+06	6.95555e+06	3.42328e+06	1.0232e+06	3.09505e+06	1.28554e+07	1.19281e+06	1.78878e+06	3.7848e+06	60158	64233.8	693745	801967	602669	113495	261420	1.11797e+06	71006.1	187959	1.58744e+06	296873	544308	30897.4	3749.1	776995	137878	1.27573e+07	420527	1.01484e+10	9.46487e+09	5.53547e+08	6.53655e+08	8.25484e+07
CLA617_1	6.24945e+08	2.28442e+09	5.14435e+08	1.54668e+08	2.72567e+08	5.76749e+08	2.67962e+07	7.47333e+07	2.12183e+07	1.14055e+08	7.7603e+08	2.03201e+11	1.78862e+08		464.549	172347	3.03661e+07	1.64996e+07	2.25756e+06	5.25326e+06	30592.2	1.152e+07	1.02327e+07	782592	1.42055e+06	9.61432e+06	1.40885e+06	1.40968e+06	2.50588	2.22348e+06	1.2595e+06	29116.6	827478	2.52834e+06	366.307	474104	1.11842e+06	94068.4	737465	470384	7.0399e+06	1.94498e+07	1.46668e+08	1.38593e+10	1.38746e+09	4.63234e+08	1.05382e+10	6.36524e+06	1.0043e+09
CHL601_2	413254	615531	605087	326829	518134	291281	576938	408011	97014.6	768733	601678	149286	363339	1930.37		3.01985e+11	4.58136e+09	3.82667e+07	1.44737e+08	7.35635e+08	6.75207e+08	1.70667e+09	3.99656e+09	4.22072e+11	1.9611e+10	1.25127e+10	2.35345e+10	2.26579e+08	5.32618e+08	1.7424e+08	5.34552e+08	9.83308e+08	1.95897e+06	1.69693e+09	6.22895e+09	1.77015e+10	6.38338e+08	1.0372e+08	1.18709e+08	3.82631e+07	6.19479e+10	1.22013e+08	4.03414e+07	1.07699e+07	325803	3.84028e+06	6.96045e+06	6.99397e+06	9.2707e+06
CLA602_2	119708	1.8794e+06	1.35401e+06	1.66419e+06	2.03402e+06	145078	1.82915e+06	988542	96271.9	2.28212e+06	2.164e+06	438341	2.86365e+06	170463	7.18793e+10		5.51729e+11	1.58466e+06	3.89826e+08	1.32025e+09	2.78759e+09	8.54474e+10	7.72896e+10	1.27822e+11	8.16719e+10	1.59184e+10	5.87538e+09	3.05861e+08	2.49975e+08	7.96915e+07	7.06927e+07	3.54173e+08	5.30365e+07	6.85875e+08	1.01875e+08	2.46148e+09	1.4046e+08	6.02694e+07	6.07454e+07	1.71027e+07	4.18228e+09	1.36978e+09	3.24337e+08	5.63799e+07	6.02598e+06	3.1181e+06	5.35291e+06	4.78804e+06	4.68166e+07
CLA603_2	554689	770860	1.3685e+06	1.30518e+06	503627	78242.6	572076	3991.11	1712.68	196223	9173.55	1.45598e+07	6.24692e+06	3.03199e+07	1.10084e+09	5.56979e+11		2.73212e+09	1.0437e+09	1.56882e+09	8.0586e+09	4.93231e+12	5.92295e+10	9.28053e+09	6.24756e+09	2.91588e+09	2.17125e+09	1.13999e+08	7.95094e+07	3.3064e+08	9.35239e+07	1.16955e+08	180679	106002	3.0713e+07	9.77808e+08	1.62987e+08	1.29315e+07	87860	1.98138e+07	6.12102e+09	8.77088e+08	2.09197e+08	3.39473e+08	7.78561e+06	4.36783e+06	1.66144e+06	7.01733e+06	6.22622e+07
CLA604_2	253324	677537	4.99622e+06	1.17169e+06	200981	75574.7	196257	1.19117e+06	2.58167e+06	2.66779e+06	34965.4	4.41079e+06	6.83088e+06	1.62516e+07	9.07061e+06	1.5781e+06	2.69516e+09		8.40428e+11	2.23644e+10	1.1104e+09	1.27024e+09	1.73669e+10	1.44906e+07	1.15412e+10	4.24068e+07	3.85003e+09	998715	5.93865e+06	82092.6	1.49985e+08	4.35292e+06	4.09805e+08	6.23804e+06	1.55394e+07	2.33494e+07	2.08012e+06	1.70397e+07	652778	7.12937e+06	3.39868e+07	4.97704e+08	3.07926e+07	1.43662e+08	1.08554e+08	1.92718e+06	2.11828e+06	41774.3	2.33915e+07
CHL606_2	1.1397e+06	31688.1	1.32234e+06	2.84702e+06	1.29138e+06	1.14405e+06	120178	184866	1.29361e+06	256992	382488	628266	1.43826e+07	9.51294e+06	1.46773e+08	1.66081e+09	4.40467e+09	3.59544e+12		1.30443e+12	7.31905e+10	4.42413e+10	3.30535e+08	3.93452e+08	5.4748e+09	2.30098e+08	5.20793e+07	5.19424e+09	1.2532e+07	4.34104e+06	1.29093e+07	1.17579e+07	9.51495e+07	2.15779e+07	6.86816e+07	5.45621e+07	1.89564e+06	1.12926e+07	2.66461e+06	79106.7	5.62996e+06	9.82546e+07	7.6292e+07	1.57274e+07	1.80818e+08	8.66738e+07	1.26695e+08	2.35761e+07	1.16121e+06
CHL607_2	2.74283e+06	2.82142e+06	53193	2.1102e+06	2.52787e+06	4.15687e+06	1.15636e+06	623689	13205.2	1.41407e+06	2.92475e+06	2.03874e+06	4.29449e+06	2.21136e+07	7.45219e+08	5.61902e+09	6.61398e+09	9.55793e+10	1.30309e+12		7.30539e+09	4.04173e+10	3.02664e+08	4.1809e+08	4.29529e+09	1.13632e+10	8.15866e+07	2.14836e+09	1.55723e+07	2.58062e+06	4.42189e+06	3.91313e+07	5.96581e+07	2.2129e+08	2.6912e+07	4.07683e+07	5456.58	9.77116e+06	1.87064e+07	19077.2	3.68213e+07	1.20685e+09	3.17217e+08	554798	3.74762e+07	5.09404e+07	1.78509e+08	2.60232e+07	2.77595e+07
CHL608_2	2.83634e+06	144768	57176.7	2.49669e+06	1.13382e+06	178344	385029	37416.8	554694	554.446	334208	1.35497e+06	1.28715e+07	127600	6.77747e+08	1.17555e+10	3.36635e+10	4.70215e+09	7.24468e+10	7.23856e+09		8.75729e+11	2.47584e+11	2.19949e+09	9.60468e+09	3.22574e+06	2.8551e+07	3.25987e+11	1.89402e+07	1.86726e+07	1569.12	2.06403e+07	2.96929e+07	7.67941e+06	8.87107e+07	1.00958e+08	1.52302e+07	9.71314e+06	1.32872e+06	821507	1.16575e+08	6.32771e+09	4.83218e+08	5.27427e+07	8.89734e+07	8.14271e+07	6.57964e+07	7.86024e+07	2.9045e+07
CLA609_2	28846.7	511756	3.28445e+06	3.48509e+06	2.76199e+06	27601.2	2.57894e+06	798542	93890.5	3.24922e+06	2.09182e+06	1.10613e+07	1.28321e+07	1.1533e+07	4.11177e+08	8.6489e+10	4.94538e+12	1.29107e+09	1.05109e+10	9.61224e+09	2.10193e+11		9.55156e+10	4.10699e+09	7.26364e+09	1.50066e+08	7.6137e+08	2.75367e+09	4.33103e+07	5.42246e+07	2.65833e+07	7.54653e+07	2.26413e+06	3.82587e+07	1.02011e+07	2.65838e+08	4.63341e+07	1.01199e+07	5.10384e+06	8.47457e+06	6.15061e+08	3.55822e+10	2.74548e+09	8.59872e+08	3.42045e+07	1.60514e+07	1.91803e+07	2.46925e+07	2.5375e+08
CLA610_2	19582.1	21662.5	2.13281e+06	351477	311219	13868.1	702219	332901	346012	1.31069e+06	236517	6.69379e+06	1.18798e+06	1.02213e+07	9.60715e+08	7.80569e+10	5.92537e+10	1.76123e+10	7.83536e+07	7.18203e+07	5.92924e+10	9.53021e+10		6.26576e+10	1.9147e+11	4.75581e+07	3.14196e+09	1.82413e+09	2.57421e+07	7.04029e+07	1.12761e+08	1.16595e+08	2.88801e+07	4.58698e+06	6.78661e+06	2.45009e+08	1.05047e+08	2.85218e+06	829460	1.48751e+07	1.03869e+09	1.70854e+09	2.01188e+08	1.67449e+08	5312.65	1.55997e+06	813229	4.82572e+06	4.77096e+07
CLA611_2	16831.7	8971.48	258161	682403	481920	2751.73	396476	57070.1	11.1912	237789	225701	1.17001e+06	1.78519e+06	783324	1.01668e+11	1.29355e+11	9.30335e+09	1.47255e+07	9.34595e+07	9.94135e+07	5.27824e+08	4.10621e+09	6.2786e+10		2.15605e+12	3.93746e+08	3.59834e+10	6.4547e+07	3.23103e+08	5.12437e+08	3.47736e+08	1.32695e+09	2.23093e+08	1.92014e+08	9.00867e+08	5.33837e+09	1.09687e+09	1.471e+08	2.26389e+07	3.83458e+07	1.03826e+10	1.03207e+08	3.54403e+07	1.88218e+07	3.07141e+06	1.09167e+06	876898	1.5455e+06	9.76725e+06
CLA612_2	1209.24	267828	518.589	1.4915e+06	1.16279e+06	101261	507918	52426.2	124004	218321	829487	9517.19	3.77478e+06	1.42097e+06	4.72084e+09	8.25991e+10	6.25892e+09	1.17207e+10	1.29964e+09	1.02068e+09	2.30342e+09	7.25762e+09	1.9174e+11	2.15467e+12		1.60553e+10	2.96229e+09	3.34932e+08	1.24683e+08	3.12267e+07	1.12843e+07	4.73509e+08	7.62507e+08	3.44486e+08	1.77247e+08	9.49867e+08	6.24995e+07	1.03015e+08	3.6993e+07	2.10062e+06	1.86858e+08	2.20344e+08	6.84758e+07	2.51121e+06	1.72615e+07	2.48029e+06	3.40688e+06	1.93963e+06	8.06791e+06
CLA613_2	715612	4.07998e+06	675022	144806	935746	336011	884327	1.455e+06	337066	2.11459e+06	2.19366e+06	2.18616e+06	59788.7	9.58348e+06	3.00155e+09	1.60427e+10	2.91095e+09	4.29157e+07	5.44305e+07	2.69077e+09	770895	1.49417e+08	4.74584e+07	3.92116e+08	1.59991e+10		3.40722e+11	4.57417e+07	5.89732e+06	1.23999e+09	9.64406e+06	4.35449e+08	4.65861e+07	1.07006e+10	5.06857e+07	4.39456e+08	2.15473e+08	3.66794e+06	2.67088e+08	507789	1.90286e+10	2.40224e+08	6.52294e+07	9041.08	26098.7	197945	2.59199e+06	289399	8.00451e+06
CLA614_2	85583.2	636038	1.94024e+06	2690.93	139691	913.502	524553	768610	664778	1.31583e+06	385226	1.01763e+06	64116.3	1.41042e+06	5.66996e+09	5.94694e+09	2.17698e+09	3.91313e+09	1.2373e+07	1.94032e+07	6.85276e+06	7.61363e+08	3.14897e+09	3.59899e+10	2.96472e+09	3.422e+11		1.16048e+07	3.99472e+07	7.72859e+07	1.67598e+10	1.08263e+10	6.11571e+10	2.39854e+09	1.30107e+08	8.90925e+08	4.28627e+08	1.7075e+07	6.9418e+07	1.68553e+08	3.77708e+09	9.33148e+07	2.55144e+07	2.45737e+07	2.49618e+06	55132.7	180683	506702	1.12144e+07
CHL616_2	9.55324e+06	6.02347e+06	1.56627e+06	1.53118e+06	2.30449e+06	2.64772e+06	2.22297e+06	1.67094e+06	344080	7.39712e+06	5.87872e+06	175243	2.91219e+06	5.93497e+06	2.29567e+08	1.30196e+09	4.80686e+08	4.26891e+06	5.18975e+09	2.1487e+09	3.29049e+11	1.15804e+10	7.68845e+09	2.715e+08	1.4097e+09	1.932e+08	4.88038e+07		3.45134e+06	161071	650408	1.04772e+07	393578	1.7655e+07	1.95087e+06	6.01855e+06	271608	1.41271e+06	3.56405e+06	391215	432226	7.18977e+10	2.89597e+09	1.00308e+08	1.99038e+07	7.48497e+07	1.59535e+08	1.43234e+08	1.38757e+08
CLA602_3	12854	2609.47	4192.61	467197	296524	7502.88	110603	1527.41	72491.2	1899	58854.5	80898.2	790802	2.47829	1.26765e+08	2.49955e+08	7.87535e+07	5.96286e+06	2.94127e+06	3.65859e+06	4.49092e+06	4.27852e+07	2.5487e+07	3.19246e+08	1.23274e+08	5.85114e+06	3.94632e+07	810736		3.80187e+11	78848.9	1.0572e+09	2.65512e+09	1.98883e+09	2.21859e+09	7.64691e+10	6.67401e+10	8.44582e+10	1.13814e+10	1.7352e+09	2.54359e+09	1.67736e+06	1.95375e+06	571853	1.28131e+06	243332	202696	199318	708695
CLA603_3	192234	922534	51143.5	104094	4736.48	60514.5	27300.8	313353	134196	229822	212947	1.18291e+06	602754	2.23035e+06	4.2061e+07	8.08213e+07	3.32166e+08	83602.7	1.03338e+06	614941	4.4906e+06	5.4331e+07	7.0699e+07	5.1354e+08	3.13139e+07	1.24783e+09	7.74384e+07	38375.9	3.85608e+11		4.08662e+09	8.12964e+08	7.10421e+09	6.8148e+10	6.44766e+09	3.83051e+12	8.41651e+10	6.56343e+09	9.97216e+09	1.61172e+09	1.17162e+11	2.10504e+06	422086	1.72871e+06	657346	80238.4	9798.16	65430.2	14436.8
CLA604_3	7505.88	53798.5	746294	31955.9	171.692	9124.44	90384.3	194848	291081	268422	15977	650106	113359	1.2617e+06	1.28866e+08	7.15987e+07	9.38297e+07	1.52539e+08	3.06891e+06	1.05229e+06	376.854	2.65998e+07	1.13084e+08	3.48017e+08	1.13006e+07	9.69197e+06	1.67704e+10	154755	79866	4.08114e+09		1.00926e+12	8.24436e+12	2.64817e+08	1.30249e+09	8.58625e+08	1.62964e+10	9.75108e+09	1.83057e+07	5.98658e+09	2.50291e+09	5.37443e+06	1.67507e+06	5.55473e+06	1.24058e+06	2476.97	5147.69	52633.7	1.77314e+06
CLA605_3	4065.72	112783	206765	208548	259900	9663.01	243192	120851	22088.4	213723	192152	155992	261548	29216.9	2.37451e+08	3.59321e+08	1.17536e+08	4.43455e+06	2.79993e+06	9.32797e+06	4.96557e+06	7.56401e+07	1.17127e+08	1.33027e+09	4.74999e+08	4.38354e+08	1.08515e+10	2.49712e+06	1.07265e+09	8.1325e+08	1.01097e+12		9.71309e+08	1.02756e+10	2.85503e+08	4.69676e+09	3.7715e+09	3.17934e+09	2.20219e+09	1.46232e+09	5.1129e+08	9.80412e+06	5.27121e+06	2.73119e+06	221886	191689	256060	256180	2.29264e+06
CLA606_3	56971.5	196170	922663	372452	81410	9563.02	26977.2	320573	566204	361637	7057.58	209207	1.10211e+06	818149	466117	5.30182e+07	178915	4.11368e+08	2.23258e+07	1.40125e+07	7.03865e+06	2.23609e+06	2.85863e+07	2.20372e+08	7.53688e+08	4.62092e+07	6.04003e+10	92428.9	2.65442e+09	7.00249e+09	8.13722e+12	9.57064e+08		2.16067e+10	1.7806e+10	1.16482e+11	2.68425e+08	9.61539e+09	2.03459e+08	5.04873e+08	7.87411e+07	4.30792e+06	437576	3.45851e+06	4.80344e+06	197567	136970	7224.88	807896
CLA607_3	165641	1.38383e+06	252207	271431	738995	166349	564056	617796	69515.1	694023	932455	466927	70182.2	2.50637e+06	4.04823e+08	6.87431e+08	105241	6.2782e+06	5.07627e+06	5.21125e+07	1.82515e+06	3.78837e+07	4.5522e+06	1.90168e+08	3.41393e+08	1.06417e+10	2.37506e+09	4.157e+06	1.99351e+09	6.73478e+10	2.62059e+08	1.01513e+10	2.16632e+10		2.1256e+06	2.37827e+09	4.5706e+08	8.60671e+08	2.5692e+10	2.05208e+07	8.99821e+09	2.52025e+07	1.30608e+07	193486	236376	193344	869852	197590	2.84402e+06
CHL608_3	558722	215713	229005	250410	51859.1	40.0349	1204.97	153422	240676	148596	10215.7	33641.5	787705	1539.66	6.30065e+09	4.32933e+08	1.29289e+08	6.63115e+07	6.85085e+07	2.68717e+07	8.93955e+07	4.2829e+07	2.85572e+07	3.78297e+09	7.44782e+08	2.13727e+08	5.46257e+08	1.94764e+06	9.42898e+09	2.70173e+10	5.46509e+09	1.19591e+09	7.56952e+10	9.01262e+06		9.119e+11	2.07588e+11	1.00866e+10	4.31053e+06	1.18862e+06	3.57295e+10	916409	1108.25	25637.2	2.18056e+06	1.38581e+06	519628	516419	9910.31
CLA609_3	103201	242696	29255.1	588523	206649	830.388	46294	82811.7	172979	35659.4	188.392	600384	1.58478e+06	474707	4.26534e+09	2.49185e+09	9.80543e+08	2.37358e+07	1.29649e+07	9.69716e+06	2.42357e+07	2.65877e+08	2.45594e+08	5.34017e+09	9.50794e+08	4.41432e+08	8.91065e+08	1.43135e+06	7.74191e+10	3.82357e+12	8.58221e+08	4.68661e+09	1.1796e+11	2.40217e+09	2.1723e+11		1.0269e+11	9.95012e+09	1.47866e+08	3.90276e+08	2.12207e+12	861049	1.81686e+06	2.29005e+06	2.87389e+06	457783	210641	363601	927679
CLA610_3	58522.3	213189	13092.6	74114.9	5450.18	18561	4470.6	31882	11350.1	12871.3	28820.1	741208	289784	1.09493e+06	1.50392e+08	1.3903e+08	1.59808e+08	2.06751e+06	440418	1269.03	3.57478e+06	4.53102e+07	1.02956e+08	1.07283e+09	6.1169e+07	2.11628e+08	4.1916e+08	63157.9	6.60662e+10	8.21439e+10	1.59265e+10	3.67964e+09	2.65785e+08	4.51384e+08	4.8351e+10	1.00406e+11		1.65832e+11	5.05832e+08	2.36725e+09	1.16758e+10	29077.8	122731	2.20673e+06	192443	65702.1	1213.8	98744.6	387707
CLA612_3	11833.8	14725.3	106298	283403	138850	7260.14	14236.4	32494	135041	20154.1	14614	1429.78	541862	93921.9	2.49217e+07	6.08406e+07	1.29311e+07	1.72728e+07	2.67573e+06	2.3176e+06	2.32511e+06	1.00928e+07	2.85091e+06	1.46734e+08	1.02825e+08	3.67402e+06	1.70294e+07	335024	8.52658e+10	6.53302e+09	9.71894e+09	3.1635e+09	9.70988e+09	8.66863e+08	2.39602e+09	9.922e+09	1.69125e+11		1.70185e+10	396145	1.71314e+08	64891.4	302997	20369.2	1.2769e+06	132203	108195	58375.5	29827.1
CLA613_3	58007.8	537282	103700	125591	338131	68173.6	266702	270008	29189.2	272441	385019	155345	30921.4	740212	2.8674e+07	6.16457e+07	88321.6	665207	634709	4.4604e+06	319750	5.1171e+06	833477	2.2702e+07	3.71199e+07	2.68946e+08	6.95991e+07	849688	1.15511e+10	9.97849e+09	1.83419e+07	2.20281e+09	2.06546e+08	2.60137e+10	1.02936e+06	1.48228e+08	5.18607e+08	1.71086e+10		3.55839e+10	2.59336e+08	5.12325e+06	3.21765e+06	61954.9	76056.8	61715.9	237685	66995.3	860660
CLA614_3	13.7633	6754.59	266104	5179.45	14816.1	2794.78	71342.4	62169.1	66313.1	83060.7	12028.6	345293	3729.23	469272	9.18635e+06	1.72508e+07	1.9797e+07	7.22102e+06	18728.8	4521.23	196491	8.44503e+06	1.48564e+07	3.82193e+07	2.09503e+06	508218	1.67967e+08	92701.7	1.75037e+09	1.60295e+09	5.96202e+09	1.45385e+09	5.09421e+08	2.06517e+07	282121	3.88858e+08	2.41231e+09	395825	3.5368e+10		1.84125e+08	1.20508e+06	680147	1.78857e+06	59714.1	10190.1	3938.85	50709.3	742564
CLA615_3	340376	1.44647e+06	5808.56	88399.8	14704.7	124895	11283.6	273431	57919.4	200416	334142	3.26817e+06	776203	7.05347e+06	1.49367e+10	4.23666e+09	6.14215e+09	3.45719e+07	1.33865e+06	8.76405e+06	2.80029e+07	6.15554e+08	1.04185e+09	1.03929e+10	1.87163e+08	1.91266e+10	3.78015e+09	102860	2.57688e+09	1.17027e+11	2.50336e+09	5.10518e+08	7.97924e+07	9.09456e+09	8.51694e+09	2.12345e+12	1.19493e+10	1.71912e+08	2.58871e+08	1.84917e+08		3.17462e+06	355305	1.15045e+07	481146	136525	49446.3	221997	603169
CLA601_4	2.01987e+07	6.81857e+07	3.06589e+07	1.71602e+06	7.64714e+06	1.35374e+06	1.30422e+07	1.84057e+07	1.06532e+07	8.05889e+07	3.47625e+07	3547.68	137328	1.94293e+07	2.93319e+07	1.38346e+09	8.77498e+08	5.04765e+08	2.32927e+07	2.86395e+08	1.51548e+09	3.55048e+10	1.70864e+09	1.03002e+08	2.20047e+08	2.40743e+08	9.31127e+07	1.70592e+10	1.69426e+06	2.09634e+06	5.35942e+06	9.76018e+06	4.35245e+06	2.53966e+07	217797	859049	29670.2	64924.1	5.09886e+06	1.20667e+06	3.16518e+06		5.76033e+11	7.45106e+09	7.50384e+07	2.69807e+07	1.31201e+08	1.53737e+08	3.3103e+09
CLA602_4	1.09051e+08	2.82272e+08	8.85007e+07	1.18595e+07	2.74434e+07	4.69442e+06	3.93885e+07	4.85936e+07	2.24777e+07	3.16982e+08	1.31453e+08	25993	1.26551e+07	1.45922e+08	9.65893e+06	3.26255e+08	2.08451e+08	3.11035e+07	1.80132e+07	7.49743e+07	1.15263e+08	2.72846e+09	2.00389e+08	3.52272e+07	6.81076e+07	6.51067e+07	2.53564e+07	6.84356e+08	1.96547e+06	418647	1.66365e+06	5.22642e+06	440316	1.31083e+07	262.329	1.80533e+06	124726	301927	3.18941e+06	678294	352819	5.73709e+11		3.47117e+11	2423.59	3.36505e+08	9.73387e+08	2.75586e+09	7.95977e+10
CLA603_4	1.52407e+07	6.4391e+07	3.97427e+08	779635	5.7302e+06	1.14815e+06	3.20156e+07	4.89029e+07	7.02643e+07	3.81901e+08	3.2232e+07	1.85335e+09	419874	1.38786e+10	2.59543e+06	5.70824e+07	3.40463e+08	1.46057e+08	3.73754e+06	131980	1.26627e+07	8.60102e+08	1.67868e+08	1.88304e+07	2.51396e+06	9082.8	2.45805e+07	2.38583e+07	579026	1.72578e+06	5.55278e+06	2.72561e+06	3.50281e+06	195454	6107.95	2.29032e+06	2.2572e+06	20429.4	61810.9	1.79531e+06	1.14983e+07	7.4693e+09	3.49376e+11		8.52882e+09	7.65538e+08	9.01101e+08	6.47668e+09	3.58684e+12
CLA604_4	9.00727e+07	5.53183e+07	1.15061e+08	1.17412e+08	1.9796e+07	1.67788e+06	158752	2.47222e+07	1.0354e+08	2.58531e+08	26045.2	1.09401e+08	1.0034e+10	1.37586e+09	77750	6.04165e+06	7.73227e+06	1.09289e+08	4.25521e+07	8.82833e+06	2.11531e+07	3.38804e+07	5274.1	3.04289e+06	1.71122e+07	25963.8	2.47255e+06	4.68804e+06	1.28475e+06	649842	1.22807e+06	219276	4.81759e+06	236454	514449	2.84624e+06	194928	1.2682e+06	75141	59355.3	476206	7.44895e+07	2415.61	8.44576e+09		6.31438e+11	3.54026e+10	1.06124e+09	2.07357e+09
CHL606_4	1.09951e+08	9.68998e+06	1.47299e+06	2.35109e+08	8.70504e+07	6.77838e+07	2.37966e+07	353914	2.38178e+07	4.13729e+07	1.88173e+08	1.24658e+08	3.98769e+10	1.95743e+09	3.90517e+06	1.33214e+07	1.84847e+07	8.26769e+06	8.69157e+07	5.11349e+07	8.24927e+07	6.77502e+07	6.5991e+06	4.60861e+06	1.04775e+07	839124	232708	7.51236e+07	1.03967e+06	338009	10448.4	807217	844354	824149	1.39319e+06	1.93194e+06	283584	559505	259817	43160.9	575786	1.14129e+08	1.42919e+09	3.23034e+09	2.69068e+12		1.64601e+12	7.44461e+10	4.67289e+10
CHL607_4	4.32093e+08	1.92595e+08	1.17478e+07	1.04902e+08	9.08365e+07	2.10026e+08	3.45843e+07	2.45903e+07	13632.6	1.73592e+08	2.35018e+08	4.86932e+08	2.33447e+09	4.45736e+10	7.08505e+06	2.28917e+07	7.03817e+06	9.09646e+06	1.27174e+08	1.79367e+08	6.67232e+07	8.10367e+07	3.44358e+06	3.70559e+06	1.4406e+07	1.09987e+07	763391	1.60276e+08	866898	41316	21735.5	1.07935e+06	585954	3.71149e+06	522910	889823	5244.18	458351	1.00162e+06	16699.8	208743	5.5553e+08	4.13821e+09	3.80613e+09	1.51006e+11	1.64763e+12		8.70136e+09	3.91745e+10
CHL608_4	1.33974e+09	2.77709e+08	9.97535e+07	9.05429e+07	5.95427e+07	2.62974e+07	6.97745e+07	3.03542e+07	9.53976e+06	2.22293e+09	5.04749e+08	5.3968e+08	2.74399e+09	2.67995e+07	7.08643e+06	2.03819e+07	2.959e+07	178566	2.35564e+07	2.60281e+07	7.93431e+07	1.03846e+08	2.03403e+07	6.50091e+06	8.16399e+06	1.22238e+06	2.13099e+06	1.43239e+08	848531	274632	221218	1.07489e+06	30765.7	839205	517292	1.52892e+06	424661	246161	281023	214007	932877	6.47959e+08	1.16623e+10	2.72308e+10	4.50582e+09	7.41769e+10	8.66136e+09		8.1765e+11
CLA609_4	2.77034e+09	2.58091e+09	1.21905e+09	4.43186e+07	1.05944e+08	1.17102e+07	1.9534e+08	2.89617e+08	2.38803e+08	4.47088e+09	9.41035e+08	1.54358e+09	8.14563e+07	9.93935e+08	2.208e+06	4.68456e+07	6.17135e+07	2.35034e+07	272728	6.52643e+06	6.89172e+06	2.5085e+08	4.72698e+07	9.65743e+06	7.98229e+06	7.9474e+06	1.10863e+07	3.26174e+07	709192	14243.8	1.75179e+06	2.26119e+06	808675	2.83934e+06	2333.48	916939	391936	29565.4	848616	736644	595797	3.2796e+09	7.91788e+10	3.54489e+12	2.06947e+09	1.09445e+10	9.16611e+09	1.92199e+11
CLA610_4	7.40902e+07	1.00199e+08	1.59432e+08	471.898	3.76351e+06	17058.7	2.57974e+07	3.56975e+07	8.12832e+07	7.83426e+08	7.00994e+07	4.07979e+08	4.81108e+07	4.96243e+08	1.46578e+06	2.66348e+07	7.5791e+07	9.35093e+07	3.3662e+06	204667	3.61135e+06	2.41079e+08	1.09868e+08	9.48173e+06	1.1097e+06	1.03703e+06	1.44517e+07	5.07747e+07	133589	202739	3.14257e+06	1.49907e+06	2.54996e+06	361267	45576.5	387910	734994	62423.3	113526	892364	2.4389e+06	6.50151e+09	7.15413e+10	7.59143e+10	1.65835e+10	1.22269e+08	6.38324e+07	5.20107e+10	8.26901e+10
CLA611_4	9.13838e+06	3.32736e+07	2.64031e+07	3.55554e+06	6.96708e+06	474555	1.18812e+07	1.12593e+07	8.4778e+06	8.55935e+07	2.98782e+07	1.65308e+07	6.62268e+06	4.16997e+06	1.17564e+07	3.75989e+08	5.36636e+08	2.4587e+08	2.04621e+07	5.46652e+07	6.30374e+08	4.84429e+09	1.17275e+09	8.87898e+07	1.18274e+08	3.59246e+07	4.99702e+07	1.2629e+10	2.05891e+06	185835	4.40547e+06	7.64266e+06	1.41432e+06	6.76643e+06	6942.42	4.17634e+06	1.4996e+06	220839	1.65337e+06	1.37463e+06	3.14108e+06	1.06587e+12	1.8259e+11	9.8072e+09	2.81499e+07	9.23027e+07	1.39169e+08	5.05224e+08	4.29947e+09
CLA612_4	1.375e+07	5.06291e+07	9.15305e+06	2.09156e+07	2.02736e+07	2.5347e+06	1.62537e+07	8.9647e+06	908259	1.03431e+08	7.4363e+07	463287	1.58796e+08	8.95733e+07	4.88595e+06	1.52271e+08	1.05569e+08	8.56075e+06	9.01081e+07	6.38225e+07	1.98186e+08	1.05902e+09	1.37841e+08	3.51195e+07	1.0297e+08	2.94903e+07	8.51994e+06	1.4227e+09	2.44941e+06	16436.9	143448	4.3888e+06	611961	7.0976e+06	207518	3.83049e+06	345648	1.05935e+06	1.85976e+06	255274	68462.3	4.24369e+10	1.00168e+11	5.47371e+09	9.86959e+09	1.02388e+09	1.00089e+09	2.06965e+09	7.60625e+09
CLA613_4	3.22406e+07	7.99296e+07	2.04998e+06	368244	6.43242e+06	5.37441e+06	4.45218e+06	1.13104e+07	2.47407e+06	3.87908e+07	3.87011e+07	2.1469e+08	2.01882e+07	1.46715e+09	498325	1.51877e+07	7.91653e+08	1.24676e+08	4.48742e+07	3.42221e+08	3.27383e+07	4.53231e+08	1.66234e+08	7.78038e+06	1.43487e+07	2.17153e+08	124935	2.69504e+08	137876	1.30975e+07	1.39865e+06	5823.53	33919.8	1.76073e+07	345903	5.78113e+06	5.25031e+06	156.104	3.29034e+06	501902	5.22154e+07	2.19796e+10	1.46109e+10	6.54298e+09	4.82596e+07	3.55647e+06	1.30303e+09	452674	3.31358e+08
CLA614_4	6.77148e+06	1.57918e+07	2.64102e+07	3.77361e+06	10442.7	7.13876	2.29319e+06	9.00606e+06	1.43642e+07	3.4418e+07	4.4763e+06	8.973e+06	7.14466e+07	3.86294e+07	1.696e+06	1.19578e+07	2.74743e+07	1.11771e+10	5.86786e+09	5.41405e+07	3.53147e+08	2.51295e+08	3.60975e+08	97776.4	6.67106e+07	3.74913e+07	1.00317e+08	1.8556e+08	1.18527e+06	1.74054e+06	1.29631e+07	871782	3.14779e+07	911208	2.14194e+06	5.14367e+06	33446.9	2.76869e+06	156405	1.17941e+06	439695	2.28196e+10	2.6588e+09	3.02268e+09	4.65464e+09	3.08431e+07	4.11873e+06	2.58197e+06	5.94699e+08
CLA615_4	1.12687e+10	7.86138e+09	3.48095e+09	2.32147e+08	1.8034e+08	2.24306e+08	5.1017e+06	462217	3.908e+08	6.0003e+07	1.05826e+09	1.01673e+11	2.27497e+09	3.83633e+11	4979.62	55820.7	2.62065e+07	2.43122e+07	3.54433e+06	3.77903e+06	56366.3	1.23169e+07	1.3474e+07	658453	2.10979e+06	5.09826e+06	2.50411e+06	1.13207e+06	29065.4	1.25837e+06	1.69002e+06	45791	1.64165e+06	1.47083e+06	18102.1	119042	852990	240097	453432	525873	5.28482e+06	579683	7.60829e+07	5.11139e+10	2.74879e+09	6.28859e+08	1.31431e+09	1.55933e+08	1.57663e+11
CHL616_4	6.91619e+10	2.51586e+09	1.37097e+08	3.39669e+07	7.82113e+07	1.61373e+08	1.33685e+08	1.3401e+08	1.84442e+08	3.88021e+10	4.51542e+09	8.41087e+08	2.60639e+06	6.5091e+08	1.73883e+06	3.82803e+06	27184.8	35008.8	1.85776e+06	1.20788e+07	1.45527e+06	4.16859e+06	287836	277786	1.5619e+06	3.75177e+06	479302	5.15517e+07	45115	303615	8903.43	192458	7225.92	1.08857e+06	40398.8	2858.52	60544.6	12504.6	378648	5151.94	624432	1.98354e+08	1.25977e+09	1.5138e+08	1.54242e+06	3.04593e+09	1.68657e+09	3.40985e+11	1.20934e+10
CHL601_5	22765.4	61083.8	420351	10225.2	79811	791.822	229692	255057	117047	94727.3	45395.2	107971	43.3048	73847.1	158700	123466	148996	64864.2	1432.36	13202.3	22336.6	140421	106950	74040	13274.3	10992.1	164485	41032.3	68201.1	34299.8	162135	98715.8	61321.1	42425.7	1197.66	47831.2	70045	22.3115	48066.3	285824	70169.5	104706	119631	246479	12393.4	22025.4	28896.8	106768	216693
CLA602_5	391.236	19417	470563	6378.91	39415	2939.69	184110	181702	120305	82644.4	20271.1	244974	556.457	221586	31110.6	187080	355664	133018	751.541	250.105	5165.98	258117	227836	155192	14160.6	0.140421	318801	4844.42	159302	212478	403155	191787	137770	13982	4.75858	148350	253819	506.839	20592.5	808664	290242	114662	124029	419981	19336.7	2961.32	1505.72	17065.1	271008
CLA603_5	1154.18	1276.84	25718.5	266820	263449	3323.79	152028	11957	4388.16	13223.5	35581.7	70715.3	157562	14010.4	54521.1	465426	454766	3618.82	20533.9	25895.1	35994.4	436349	181176	333944	225562	9862.5	112641	13996.9	1.39294e+06	506044	47919.7	389024	76733.7	213265	39168.8	817135	383718	435549	295590	494520	329363	82188	144673	140278	71539.8	30120.6	22503.2	29590.8	168207
CLA604_5	14076.6	184921	30662.5	45903	200636	41927	145478	163834	13018	63794.6	127662	76353.8	1312.82	175599	12639.5	95799.4	8599.14	6451.5	3935.37	25202.6	962.102	12959.8	184.175	6802.71	55759.9	271697	12473.5	10142.6	55726.6	222544	7190.72	50913.2	6914.17	551781	151.854	925.846	55946.4	35553.9	685845	4561.34	154962	99950.3	118114	146.819	3641.33	4082.92	19163.1	3874.09	56608.9
CLA606_5	11746.4	123669	779.973	9555.32	76466.5	35389.9	33734.5	60603	704.093	19571.7	67250.4	173707	917.833	276220	602.177	6442.33	130434	32932.9	2275.06	15860.4	342.852	17115.8	47800.7	15923.1	15453	252806	15015.7	3476.69	3069.57	548483	114485	503.013	27634	424461	1705	81616.9	252192	10260	541362	269514	416532	27684.3	31061.9	56380.9	3131.03	369.814	9293.78	1.77168	716.133
CHL607_5	265.97	1036.57	129491	34879.4	27049	106249	2229.99	18661.9	51665.2	8917.18	3720.94	112985	19063.7	178972	7135.4	207.912	70765.7	126799	74820.3	72131.8	3673.11	17816.6	55446.9	8518.3	20922.2	35771.3	116849	2145.38	22855.9	83744.5	283076	10409.6	222118	85001.2	43197.5	95.4668	79098.3	107228	103870	411297	132040	4852.63	1059.57	125854	49934.6	13303.2	33678.1	2364.91	29007.5
CLA608_5	8114.78	55242.6	8711.55	18288.3	86.1473	11760.5	845.975	15754.1	1493.91	2279	11107	160365	31735.6	169447	6708.49	51293.8	276416	11361.8	591.005	438.125	8328.95	131322	114397	113586	12754.2	89107.4	54425.9	78.1906	285946	649945	112423	83808.1	60.9391	60125.2	12388.7	327742	396945	45285.4	69116.2	452461	475099	24.8641	1108.09	104403	4247.52	3168.51	40.9126	5218.32	23006.5
CLA609_5	0.496705	7537.3	186237	44230.8	73021.5	189.133	127854	69539.6	29832.8	41723	19949.3	144454	20974.1	105166	43798.2	288409	412180	54982.2	894.66	4154.28	12992.8	322918	231001	239081	62620.4	851.446	287820	7520.48	558713	384387	336631	324417	35040.8	61734	4910.55	380032	390194	50950.5	97320	1.07416e+06	363893	99334.4	120432	277880	3.12407	8231.71	5259.31	18742.9	203535
CLA610_5	805.004	39282.1	80183.6	126059	209956	7445.51	185254	82264.2	6571.04	43854.9	63444.7	21250.9	46657.4	332.911	32983.7	256199	162481	851.926	6438.72	15931	13351.6	203794	92348.1	148316	105676	43048.1	99703	11236.9	453436	65968.7	48077.3	207311	3981.24	202078	7183.75	221675	102833	122824	266138	249977	58996	99628.6	139450	97848.3	14315.8	13869.8	15653.2	18196.1	152220
CLA611_5	523.742	1683.65	126809	133557	158299	0.0173658	170739	43611.2	7063.43	27308.6	22959	143390	64378.7	76374.8	24671.3	199288	279803	9965.81	3468.44	5520.36	14300.3	244692	140657	159407	65400	224.454	109950	6427.42	333697	207889	89033	160930	5.9486	35385.9	7570.02	256322	188875	65614.8	45192.8	299237	196953	62169.3	96240.1	197289	9789.21	13869.5	8161.28	21264.6	169149
CLA612_5	2709.01	18213.4	122533	19.812	2052.34	18145.1	13500.2	3762.84	23319.4	4402.82	4980.77	233143	1941.27	257641	5544.54	31453.8	200962	61519.6	864.693	1886	2303.65	96745.1	109715	63020.4	259.835	43231.7	100549	78.1827	48958.4	250865	176758	52158.1	49140.7	34067.5	475.893	93829.1	189747	800.735	33930.7	354875	265348	7211.77	7601.03	189709	7341.7	524.41	631.133	4830.09	60225.2
CLA613_5	12495	84368.8	505674	288112	84277.4	4750.92	22486.5	302942	315204	88188	3884.87	29059.8	229747	80987.3	42.4907	16587.7	5262.27	225540	30071.5	11653.2	13528.2	10354.2	6482.68	17106.6	86111.5	3471.88	113080	363.707	326986	94019.3	223555	3093.82	442099	9051.04	38681.4	209555	12667.9	331665	11663.6	106850	9631.68	30633.3	7874.81	104934	235444	16453.8	7995.54	1063.57	44664.1
CLA614_5	21106.2	354938	248621	156197	598991	71141.5	530939	522365	68039.5	178499	275299	16766.2	11543.5	108307	29008.7	228997	23587.9	828.387	4779.98	31768.8	5236.53	112146	29367.9	58358.7	89587.8	233851	86520.1	18146.4	140737	42447.5	15602.7	132644	68.6359	478902	44.2665	23921.8	38.6588	37160.3	492252	56625.7	21951.3	215797	278675	59070.8	2971.94	13271.5	36858.6	18481.9	248184
CLA617_5	4290.04	17557	965778	459108	254121	51656.6	13116.7	300338	452255	86375.5	4634.47	299078	281068	582209	22.0005	15655.5	33106.7	451092	50462.8	34742.2	12352	470.152	64554.3	1326.38	130022	27044.5	249202	1631.24	297068	414.94	516822	34.4931	706686	132692	37944.4	112877	16838.3	403864	130227	382406	60264.9	25279.4	2992.1	382031	369812	22909.4	24650.2	301.409	95554.6
CLA601_6	36306.2	151086	3.38402e+06	787793	692187	200436	1.61911e+06	334608	220414	138285	4471.18	3.59642e+06	354933	2.87554e+06	44002.1	412751	1.3324e+06	130218	1382.03	664.599	39975.8	958804	564273	371983	68523.7	52434.2	311552	9132.26	334485	612643	271786	209387	24414.8	1090.38	9400.79	482609	424316	27173.2	71.2777	447036	830998	160919	302628	2.17834e+06	1793.25	56194.6	8477.41	127466	1.25654e+06
CLA602_6	62573.1	525131	660595	213353	9001.9	226895	118704	57348.3	8091.27	11.8148	70807.5	2.22625e+06	218688	2.19912e+06	21799.6	196480	1.10539e+06	86373	467.523	1663.21	28053.9	610888	420130	282272	27762.5	176338	192085	1012.14	309275	898621	238419	140675	13621	71059.2	13131.2	515222	513693	24988.6	46406.1	457922	1.02935e+06	14750.6	37971.8	1.15022e+06	3930.27	22538.5	151.063	50735.7	378156
CLA603_6	63323.6	373946	387677	1.69655e+06	800604	227.464	52909.3	636593	579625	80678.1	1190.51	264758	1.04022e+06	74191.4	24625.6	349632	654700	118555	58984.1	26375.1	72151.8	534555	138667	312323	271642	36519.7	1028.19	7608.24	1.06158e+06	794076	5434.51	168044	325431	12769.9	75691.1	992937	346869	455732	16345.8	76008	532597	146.258	36238.3	65063.4	516417	98231.4	37342.5	51360.7	55770.3
CLA604_6	38794.4	777925	450521	611167	2.00643e+06	229459	1.41785e+06	1.24755e+06	87429.6	333047	643866	59831.8	65205	320739	35933	328501	36391.6	1311.62	12280.3	54902.8	11002.8	180473	35019.1	81197.8	145674	295922	77554.7	28582.6	186286	32967.9	4827.17	143384	5252.65	546585	911.113	46040.7	7.11807	62798.1	471456	33782.1	24138.2	324933	483238	77506.1	26456.6	35513.4	85130.9	38861.6	454051
CHL606_6	284044	482395	89514.4	63197	503753	1.08443e+06	362467	545048	46850.8	133583	275238	227768	822.36	427097	52464.2	53400.8	30953.4	4162.15	17556	183414	522.787	1886.14	3498.66	200.249	27907.1	233072	5384.54	73408.3	5501.92	194166	5760.9	14247.8	877.068	324319	8317.02	13027	54502.1	5136.2	284514	8012.92	165610	113074	145683	3950.18	663.725	27266.5	227266	27111.5	74764.9
CHL607_6	185439	288004	70953.5	68043.8	333183	1.34148e+06	68529.3	112098	7345.72	19147.1	156572	634896	462.053	967676	524.539	3095.26	185869	78453.8	48550.4	186752	1230.09	32542	71448.6	16726.5	19119.4	213205	36874.2	29130	71.3535	309730	118926	2014.78	52612.5	267461	1027.78	42644.3	140969	14876.1	219062	155010	345535	19700.7	31885.4	207252	26151.1	13360.7	188121	1191.8	2728.76
CHL608_6	330623	435533	77398.7	25531.1	67180.3	587853	114924	475982	100215	96841.4	143278	279144	79381.9	332627	50.5846	431.142	145272	132.504	6232.76	30436.2	41509	39987.1	33501.7	29418.2	848.169	148429	5.19011	12356.3	62777.5	339103	6257	3744.52	10616.8	126056	78627.7	138833	136024	18335.5	108189	38611.8	274878	43587.9	38187.8	31778.3	22320.5	16464.7	33046.7	7907.91	6636.15
CLA609_6	43427.7	296931	10439.3	416556	105585	45387.5	39522.2	154928	58817.4	13075.6	21644	745148	342275	628374	21074.1	220045	789813	1121.67	10649.3	1172.65	37331.5	482241	256936	280650	87373.1	113458	73968	2246.86	609062	945098	79530.1	161922	24821.9	20091.4	33495.4	713010	493925	147363	11999.2	340625	815661	3007.21	23288	369552	87234.3	34005.9	3424.62	35276.3	131821
CLA610_6	21596.7	74544.6	8006.86	1.23223e+06	885468	739.008	271776	70449.5	173643	1548.72	16414.4	248894	581842	67574.8	22827.3	269250	409400	21214.1	25603.5	16768.3	40597.8	381811	129395	212925	160282	2936.42	23123.1	8822.94	519130	326545	3797.15	133452	85931.7	27814.7	30063.4	466459	195173	195901	29313.9	91907.6	260148	25146.6	91845.1	144097	219292	63363.2	29791.7	48564	155526
CLA611_6	98453.1	816288	30446.1	1.33779e+06	374817	153767	138328	597888	184306	33290.8	61398.6	1.78239e+06	748318	1.27041e+06	16257.5	191753	749631	1120.94	10927.9	1042.35	39873.5	500942	250476	233446	76421.1	93175.7	55881.8	2476.91	332944	559495	49880.5	104163	16233.3	13289.2	22833.6	463427	308747	83447.1	6708.12	167568	583861	3289.92	31799.9	586001	142141	59997.4	5382.68	63226.2	230304
CLA612_6	91348.3	1.19448e+06	19730.4	9280.42	708818	461510	291455	929508	19096.7	124769	493944	1.61613e+06	50984	1.89757e+06	35.6067	104.911	339059	43806.7	1272.09	18511.6	3839.51	91804.3	115677	47188.4	4026.09	271177	25274	3903.83	24737.6	437143	78777	7692.08	9682.82	231446	3793.2	126396	205859	0.250731	171831	125238	488250	46630.7	59026.3	333674	911.496	104.117	26579.7	2664.87	2325.07
CLA613_6	29914.6	357031	7.1162e+06	1.02739e+06	180265	124946	862068	3.47812e+06	2.34755e+06	646152	44372.7	1.38188e+06	568454	1.80689e+06	9284.43	24041.6	188802	618259	46761.2	15484.1	4186.74	99608.8	199489	20716	43078.1	275.571	417418	560.337	41658.9	6010.67	482900	35857.2	523257	6072.72	21370.9	14176.2	40948.2	152454	4131.71	346096	94274.1	219660	173426	1.54647e+06	720820	17853.2	13462.6	9286.99	833975
CLA614_6	22450.3	1.17006e+06	1.87372e+06	5.15766e+06	1.1493e+07	603836	6.38558e+06	3.41108e+06	66612.7	694538	1.54999e+06	112255	925467	101706	73025.8	793497	486032	1930.78	40708.4	96095.9	56956.4	833679	225717	315929	338695	190931	169486	56063.7	488827	44045.6	29004.8	289929	24950.1	462445	12441.7	331196	77864.1	149111	333350	128744	52647.9	602547	1.15201e+06	681672	235012	194385	251250	189677	1.69496e+06
CLA615_6	2835.67	475.838	477342	749729	604977	61319.8	35403.6	105734	339965	21392.5	43429.3	113040	390147	353083	9050.92	161448	14623.1	294519	56317.5	50718	28667	73921.4	1155.52	63520.2	237401	48484.2	59297.3	8719.89	686970	29264.3	228629	50572.6	544604	255167	48208.8	323693	5784.36	514117	262484	69660.8	835.007	1593.39	31622.1	97563.4	367534	44473.2	45081.5	11105.7	163.891
CHL616_6	4725.89	2871.14	250221	3791.35	2866.04	151262	36161.2	39616.2	68668.8	17407.9	901.342	226610	637.348	239620	29098.8	18606.2	112612	58669	13567.4	11738	5376.15	58650.3	69508.4	29794.7	102.612	14116	72046	964.976	8915.03	79777.9	105482	24208.5	47335.7	10317.2	449.147	25600.1	70951.6	4959.45	8663.14	151509	113873	13013.8	12465.5	187668	18993.3	491.239	5120.77	33636.7	74639.1
CLA801_A	21380.7	5483.18	2.10394e+07	229607	500366	526889	2.54193e+06	2.97827e+06	1.99011e+06	1.66615e+06	113640	2.28853e+07	235291	5.51386e+07	1.68776e+06	1.6588e+07	8.06897e+07	1.24332e+07	75030.5	6938.88	605629	4.31769e+07	1.67614e+07	8.53479e+06	686582	1.39418e+06	1.83441e+07	189597	4.24869e+06	1.66458e+07	1.24203e+07	4.96404e+06	5.00209e+06	15734.6	17981.2	1.08549e+07	7.21504e+06	657.273	102.029	9.87422e+06	3.49279e+07	8.05572e+06	9.8827e+06	7.07316e+07	1.07775e+06	292412	53301.4	1.09812e+06	2.60182e+07
CLA802_A	104250	1.46252e+06	8.82502e+07	4.95712e+06	4.25499e+06	5.12024e+06	681048	5.89123e+06	1.049e+07	2.55705e+06	927113	6.76576e+07	4.13347e+06	2.59295e+08	239296	777975	5.8853e+07	2.64197e+07	2.41202e+06	3.17924e+06	23447.6	1.9042e+07	1.46098e+07	1.92957e+06	1.85578e+06	6.51266e+06	1.1458e+07	35415.3	151159	6.46435e+06	9.47952e+06	538592	9.99017e+06	4.5577e+06	172024	439153	3.33634e+06	1.3432e+06	1.40209e+06	4.08013e+06	2.48332e+07	3.8845e+06	2.0889e+06	2.07251e+08	1.78543e+07	470446	2.6955e+06	391250	3.9361e+07
CLA803_A	840870	5.24307e+06	4.47308e+06	5.07507e+06	1.13892e+06	79639.1	11847.4	5.09099e+06	2.95454e+06	1.17239e+06	253442	2.6411e+06	7.48508e+06	2.56079e+06	351965	7.11309e+06	2.6191e+07	3.13242e+06	1.36098e+06	438582	1.48214e+06	1.39812e+07	2.34127e+06	5.44024e+06	4.21908e+06	3.80176e+06	63498.6	38235.3	2.09559e+07	3.04085e+07	234775	1.79925e+06	8.55364e+06	211610	1.72485e+06	2.97892e+07	6.42663e+06	6.13232e+06	40905.1	694506	2.44212e+07	475997	1212.1	636644	6.41526e+06	950803	274620	376879	50695
CLA804_A	1.19951e+06	6.67246e+06	4.38698e+06	17117.2	476863	1.17639e+06	40.6549	203930	289897	18687.4	1.34277e+06	2.6643e+07	297185	8.45682e+07	5.78857e+06	7.87623e+07	2.12264e+09	5.83288e+07	1.66829e+06	1.28419e+07	4.41143e+06	4.54367e+08	1.57609e+08	6.03592e+07	407448	1.63391e+08	5.62779e+07	163407	1.19624e+07	2.45526e+08	4.05695e+07	5.68192e+06	1.87532e+07	6.01588e+07	736771	1.20627e+08	6.11406e+07	138200	1.11042e+07	1.68134e+07	1.15484e+09	853.295	2437.85	1.67022e+08	1.40606e+06	41060.2	1.00435e+06	860348	1.46347e+07
CLA805_A	379214	2.17524e+06	2.86259e+06	48896.1	280893	569692	6126.03	11174.5	331095	6701.93	556575	1.22348e+07	21872.6	3.44837e+07	9.89589e+06	7.25074e+07	1.30678e+09	5.77949e+07	1.89838e+06	9.62965e+06	1.72732e+06	2.20327e+08	1.27414e+08	6.78594e+07	1.48542e+06	1.88872e+08	9.71659e+07	85493.2	2.29861e+07	7.01923e+08	9.45818e+07	9.63631e+06	5.8162e+07	1.39257e+08	445286	2.5984e+08	1.25444e+08	1.51246e+06	2.55914e+07	3.90573e+07	2.7831e+09	376705	92496.5	6.36631e+07	1.40607e+06	2726.3	472889	345969	6.78274e+06
CLA806_A	546464	2.47458e+06	756834	1.43333e+06	238224	45915.6	396.466	1.24017e+06	970728	562837	154271	1.95951e+06	3.62152e+06	2.54414e+06	9.61969e+06	1.20363e+08	3.06578e+08	7.04107e+06	3.92533e+06	1.13748e+06	7.21148e+06	9.41158e+07	2.41204e+07	7.22367e+07	2.98676e+07	5.27244e+07	388367	120838	8.22599e+08	1.66957e+09	2818.87	1.95419e+07	9.65711e+07	1.2702e+07	3.65617e+07	1.22784e+09	1.61983e+08	7.81173e+07	2.50581e+06	1.52906e+07	1.40684e+09	828767	33969.3	2.44918e+06	4.68877e+06	657384	136462	411850	273860
CLA807_A	931457	4.86221e+06	758218	1.09291e+06	20198.1	228899	69109.2	2.05811e+06	979713	990237	614171	4.78332e+06	3.9132e+06	9.94468e+06	4.80282e+06	7.87428e+07	5.74385e+08	3.37582e+06	3.496e+06	3253.5	7.55978e+06	1.2901e+08	3.46389e+07	6.65416e+07	1.80079e+07	1.74191e+08	1.54433e+06	666.472	3.04379e+08	1.42173e+09	2.92848e+06	1.46277e+07	5.75621e+07	1.20761e+08	2.35031e+07	8.86836e+08	1.30602e+08	3.49736e+07	2.07559e+07	1.75237e+07	1.73116e+09	4.17654e+06	648293	6.41399e+06	4.50127e+06	612853	5403.46	376138	112312
CLA808_A	826713	3.68898e+06	9.66026e+06	2.34981e+06	240544	5172.16	437844	3.95326e+06	3.97224e+06	3.2699e+06	364899	478299	8.57549e+06	3.76007e+06	903212	2.37008e+07	9.58948e+07	5.75226e+08	7.67629e+07	6.09398e+07	1.83622e+07	2.42866e+07	1.08853e+07	1.87344e+07	1.04812e+08	2.40703e+08	4.34225e+08	1456.37	1.03408e+08	2.2521e+08	1.73383e+08	66966	7.83168e+08	5.40267e+06	3.85606e+07	5.02507e+08	7.8551e+06	6.00187e+07	194428	1.14513e+07	1.73196e+08	5.0378e+07	1.17931e+07	3.52741e+07	3.33347e+07	1.45623e+06	677388	28534.4	1.10137e+07
CLA809_A	1.64726e+06	1.03285e+07	389479	69547.1	834630	1.28316e+06	683728	3.5169e+06	564573	1.93836e+06	2.6997e+06	1.51759e+07	2.26345e+06	5.744e+07	27.0018	417933	7.01647e+08	3.91264e+06	71872.2	2.47889e+07	3.13041e+06	9.16559e+07	3.45955e+07	2.28312e+07	3476.85	5.05216e+08	3.76937e+06	728071	1.62198e+07	3.67811e+08	1.26542e+07	2.07451e+06	1.05291e+06	3.2896e+08	3.89927e+06	1.51907e+08	4.64322e+07	1.5145e+06	4.11752e+07	1.0471e+07	6.99614e+08	2.10023e+07	1.25022e+07	2.08386e+07	1.1555e+06	112016	1.45251e+06	91892.1	262694
CLA810_A	1.46749e+06	5.44616e+06	1.90202e+06	1.90235e+06	216200	862117	264550	424469	35390.3	37539	411893	3.81724e+07	8.46125e+06	1.35796e+08	8.35846e+06	1.6859e+08	2.41607e+09	2.57162e+07	4.03202e+06	67326.4	1.71748e+07	8.51962e+08	1.32549e+08	7.73135e+07	1.815e+07	1.43564e+08	5.88184e+07	447869	2.67956e+07	1.47422e+08	2.11535e+07	1.74029e+07	471.823	1.40023e+07	2.905e+06	1.3744e+08	3.55607e+07	2.99819e+06	1.49868e+06	1.32272e+07	4.37289e+08	4.41119e+06	1.02983e+07	2.25297e+08	3.94461e+06	2.90682e+06	134291	3.02177e+06	3.20319e+07
CLA811_A	491317	3.60868e+06	2.16568e+06	3394.82	536927	159018	1.07856e+06	2.25344e+06	891371	2.00575e+06	1.34883e+06	238133	289737	1.27167e+06	1.86712e+08	4.06743e+08	2.57781e+06	1.69807e+07	135605	7.94744e+06	52070.8	1.59075e+07	7.0414e+06	1.42059e+07	1.49304e+07	8.5994e+08	3.26771e+08	2.39176e+06	135659	4.65822e+10	2.39873e+08	8.85445e+07	6.2735e+08	7.07935e+09	1.50577e+08	3.00798e+09	3.12431e+08	3.86469e+07	1.66834e+09	5.17741e+07	9.99453e+09	4.13323e+07	2.03355e+07	2.89894e+06	906259	11168.9	418967	151332	6.30268e+06
CLA812_A	1.13832e+06	5.80719e+06	6.00535e+06	1.07721e+06	5405.6	37931.8	620597	3.91471e+06	3.14288e+06	3.32387e+06	852947	133963	4.54456e+06	104321	6.39916e+06	1.76351e+07	3.47371e+08	1.11342e+08	1.4787e+07	920723	1.7664e+07	4.15336e+07	1572.05	6.3155e+07	6.40237e+07	2.94235e+08	1.55076e+08	299841	5.28274e+08	1.67379e+09	8.8904e+07	160418	5.12924e+08	1.04589e+08	1.45214e+08	2.39825e+09	1.12444e+08	1.09407e+08	1.6584e+07	3.69446e+06	4.5196e+09	6.17876e+07	1.77914e+07	7.67252e+06	1.24391e+07	538842	16198	23070.8	6.70528e+06
CLA813_A	90605.7	391583	98086.6	94972.2	3986.52	52132.2	13310.1	40769.3	2483.52	6716.47	51057	1.60576e+06	340526	2.73518e+06	2.16414e+07	6.60394e+07	1.6367e+08	3.18144e+06	119177	54384.6	1.81096e+06	4.14774e+07	3.93454e+07	1.06186e+08	7.6912e+06	8.38445e+07	8.09061e+07	27823.3	4.56626e+10	7.67845e+10	4.52746e+08	1.25142e+08	1.99904e+06	4.61106e+08	6.83878e+07	7.86076e+09	2.67304e+09	2.22084e+08	4.97565e+08	1.2461e+09	4.993e+09	95661.2	206611	4.56417e+06	93572.9	73709.1	2.39163	136559	823785
CLA814_A	1006.93	80.5405	2.00205e+06	35320.5	7668.09	71021.3	159099	278962	489884	298835	122.935	2.495e+06	48703.1	5.34406e+06	2.21916e+07	5.43421e+07	1.78811e+08	3.84325e+07	1.05918e+06	1.10655e+06	157251	4.18485e+07	5.02245e+07	4.94057e+07	466090	2.73011e+07	2.21035e+08	41285.5	2.11365e+08	5.31015e+09	6.05873e+08	5.17473e+07	4.60224e+08	1.41959e+08	3.14765e+06	5.5951e+08	4.26895e+08	4.34356e+07	5.29195e+07	4.68287e+08	2.64781e+09	4.09322e+06	1.92973e+06	1.39875e+07	1.12107e+06	21.9835	24922.9	129871	3.57756e+06
CLA815_A	57425.8	277674	2.22841e+06	435359	75250.5	26182.1	114408	687200	918766	581673	19993.6	832066	1.07747e+06	2.57556e+06	3.64837e+06	377513	2.00337e+07	1.15276e+08	7.42717e+06	5.61729e+06	1.01904e+06	2.71946e+06	1.73291e+07	468207	2.63731e+07	88549.6	6.13623e+08	158.799	4.01264e+08	6.66682e+07	2.06788e+09	2.26823e+07	4.06543e+09	8.86028e+08	5.64009e+07	5.09597e+08	1.30555e+07	3.33898e+08	6.28052e+07	5.25597e+08	1.1561e+08	4.89104e+06	1.2817e+06	8.13923e+06	4.53834e+06	130869	114419	4351.98	2.23407e+06
CLA816_A	53152.5	338724	154748	16470.5	93900	102194	6828.46	28189.9	17194.4	9173.11	148629	1.51801e+06	3595.24	3.57644e+06	686171	964576	5.85412e+07	1.43451e+07	388157	2.52151e+06	113548	8.87211e+06	1.63665e+07	1.81331e+07	1.60064e+06	1.75127e+08	9.79153e+07	57633.5	8.99489e+07	7.03279e+09	1.29788e+09	6.44861e+07	3.84204e+08	8.95845e+09	1.08308e+06	4.69712e+08	4.65695e+08	2.45014e+07	9.55172e+09	3.45092e+09	9.19716e+08	96097.2	84357.7	3.20053e+06	159350	259.528	95295.3	15198.8	202652
CLA817_A	76523.4	342845	1.90023e+06	459547	71602.5	15321.3	96815.5	650972	879156	600220	29176.4	534101	1.29044e+06	1.81685e+06	4.17832e+06	197504	9.31825e+06	2.13404e+08	1.33458e+07	9.69215e+06	2.14499e+06	702182	1.91867e+07	564542	6.3723e+07	1.89406e+07	1.94844e+09	58.3999	5.53826e+08	7.2478e+08	6.85494e+09	3.13371e+07	1.93214e+10	6.29432e+09	1.3778e+08	1.84473e+09	1.30056e+06	6.02294e+08	4.88904e+07	5.2994e+08	3.04451e+07	6.00123e+06	1.31944e+06	7.02743e+06	5.4769e+06	175868	124411	393.924	1.9791e+06
CLA818_A	137758	1.16357e+06	1.02735e+06	663.442	267387	67639.7	509812	1.04506e+06	408312	718815	509844	36702.4	119681	258104	3.56163e+06	1.16051e+07	16965	3.50947e+06	36907.3	887702	2431.47	1.74525e+06	1.02843e+06	1.19202e+06	1.00465e+06	5.61098e+07	3.68181e+07	296590	195895	3.24302e+08	6.21143e+07	3.10467e+07	6.91755e+07	7.70825e+08	3.53967e+06	1.66562e+07	8.31046e+06	9.20847e+06	1.59796e+09	1.72418e+08	3.253e+07	5.13059e+06	3.2329e+06	945112	335619	3363.07	118585	44388.5	1.73599e+06
CLA819_A	1808.81	423.511	1.24561e+06	12088.4	28480.9	32523.1	219852	201881	216992	194127	10335.6	1.75526e+06	14776.9	3.06503e+06	3.85395e+06	1.65296e+07	4.50938e+07	9.24944e+06	52886	12110.5	264975	1.67937e+07	1.35774e+07	1.4964e+07	709206	3.00703e+06	5.52246e+07	75784.3	7.58743e+07	3.01068e+08	1.35545e+08	3.71855e+07	4.56946e+07	895740	57565.6	8.45577e+07	6.26898e+07	37461.9	118377	3.26204e+08	1.45349e+08	1.92729e+06	1.41779e+06	6.83735e+06	185009	26679	2750.51	135000	2.38949e+06
CLA820_A	307495	1.87082e+06	2.24425e+06	491391	0.913561	29800	297292	1.74624e+06	1.15683e+06	1.06052e+06	366034	92588.2	1.66515e+06	114826	370530	157085	1.67577e+07	2.13348e+07	2.38941e+06	65625.2	1.29656e+06	2.42474e+06	7247.93	5.5812e+06	6.49391e+06	7.7065e+07	4.73746e+07	50813.5	3.34916e+08	1.2044e+09	8.59228e+07	86129.7	3.36358e+08	3.19936e+08	2.33731e+07	4.45475e+08	4.56847e+07	1.03673e+08	1.17197e+08	1.33653e+07	2.16403e+08	5.90398e+06	2.28142e+06	1.17976e+06	3.41442e+06	147046	711.477	3517.97	1.42165e+06
CLA821_A	12045	58109	532070	8209.53	15016	51719.5	25149.3	23252.8	114325	38015.4	19784.7	1.25952e+06	546.024	2.48501e+06	5.20328e+06	1.02867e+07	5.06029e+07	1.22825e+07	263101	552148	119364	1.20039e+07	1.91372e+07	2.44484e+07	160689	2.90364e+07	9.20694e+07	747.23	1.59474e+09	9.62919e+09	7.44127e+08	5.95755e+07	2.77752e+08	3.81652e+08	1039.93	5.46511e+08	8.39629e+08	5.99814e+07	1.40772e+09	3.29476e+09	9.02947e+08	447904	209571	4.30269e+06	264553	471.81	20560.8	45268.3	873717
CLA822_A	97114.7	348968	318431	851787	306080	71.4845	17321	289800	407408	110250	560.231	215533	1.45509e+06	62039.8	3.21746e+06	2.65749e+07	3.11787e+07	4.26403e+06	1.47906e+06	987746	1.68636e+06	1.49859e+07	3.86432e+06	2.10901e+07	1.3823e+07	2.84331e+06	5178.01	114035	1.41149e+09	8.6369e+08	3.69224e+06	2.15565e+07	9.52628e+07	9.83915e+06	1.89452e+07	4.97342e+08	9.29544e+07	1.58237e+08	1.75358e+07	2.21199e+07	1.60998e+08	100.896	227998	162462	1.92908e+06	268076	132849	139870	122022
CLA823_A	108512	1.07775e+06	1.0368e+06	30692	363434	57617.2	635947	1.00732e+06	351615	700340	516084	1174.1	17228.6	109522	5.36251e+06	1.9133e+07	1.57704e+06	1.73732e+06	131.334	711292	32710.6	3.95343e+06	2.25911e+06	4.24153e+06	2.34469e+06	2.61164e+07	2.36279e+07	342813	1.10938e+08	1.25041e+08	3.60806e+07	2.48033e+07	2.18218e+07	2.44348e+08	1.37092e+06	128407	191221	58076.2	7.34601e+08	1.57748e+08	8.66919e+06	5.20328e+06	3.69771e+06	1.2713e+06	110780	19489	127835	83202.4	2.02428e+06
CLA824_A	151279	1.37679e+06	1.51517e+06	3286.27	221425	52115.3	633960	1.40605e+06	605161	825863	498526	5782.02	166785	83140.1	1.83504e+06	6.34035e+06	69584.5	2.34801e+06	55546	227767	8317.9	1.09893e+06	878426	573475	189621	1.44032e+07	1.25294e+07	176959	1.07168e+06	8.24108e+07	1.77175e+07	5.57282e+06	2.14992e+07	6.91804e+07	2.18981e+06	8.12496e+06	2.72541e+06	7.27155e+06	1.29514e+08	3.33803e+07	1.09787e+07	4.07332e+06	2.79824e+06	1.14427e+06	402274	300.712	61590.3	39303.5	1.74953e+06
CLA825_A	290787	2.54881e+06	2.41582e+06	41532.6	250219	95937.7	874657	2.42324e+06	1.01493e+06	1.26371e+06	753691	83649	437635	322683	1.32544e+06	4.53294e+06	469830	2.80566e+06	132616	224283	75628.6	317151	319496	13948.7	7936.95	1.80404e+07	9.80209e+06	183038	1.27554e+07	1.08603e+08	9.92708e+06	2.05645e+06	2.02091e+07	5.44904e+07	2.92115e+06	2.16665e+07	7.17773e+06	8.31945e+06	6.04289e+07	7.43465e+06	2.69653e+07	5.48433e+06	3.75193e+06	1.12979e+06	781936	2876.33	68792.2	26866.6	2.20525e+06
CLA826_A	389027	3.38319e+06	2.7735e+06	71.0187	533692	152074	1.2199e+06	2.77557e+06	1.03496e+06	1.73677e+06	1.15377e+06	113206	306459	670530	7.65983e+06	2.98158e+07	58856.1	5.04734e+06	88397.7	1.31197e+06	23047.6	3.33988e+06	1.61807e+06	1.31325e+06	1.16092e+06	7.01187e+07	3.37399e+07	590801	1.26809e+06	4.88659e+08	2.87774e+07	1.144e+07	4.94955e+07	3.34595e+08	6.48327e+06	4.29692e+07	1.41376e+07	8.06717e+06	2.66358e+08	2.2887e+07	1.06356e+08	1.35608e+07	9.0345e+06	2.24775e+06	743310	3012.44	222858	93288.7	4.35561e+06
CLA827_A	7813.69	29192.2	969442	2.47455e+06	2.03093e+06	236992	323410	62598.6	724639	7959.73	343543	335459	2.48394e+06	2.85593e+06	1.69369e+06	2.14695e+07	5.01574e+06	8.56174e+06	2.20575e+06	3.46922e+06	1.28287e+06	8.63914e+06	209634	5.97147e+06	1.24047e+07	5.78219e+06	768188	348898	1.07826e+08	8.9002e+06	8.73478e+06	5.63198e+06	3.82971e+07	5.45504e+07	3.53918e+06	5.51325e+07	1.60493e+06	2.95391e+07	3.40008e+07	499418	396393	682605	2.00696e+06	390226	3.88086e+06	567396	780846	219005	304047
CLA828_A	11661.7	276776	2.61562e+06	78096.2	307477	868.591	774582	911241	476038	632562	214722	1.53176e+06	17941	2.05439e+06	3.86806e+06	2.10947e+07	3.21033e+07	6.49885e+06	5947.04	185750	281435	1.74884e+07	1.04085e+07	1.09317e+07	1.67014e+06	900231	3.54797e+07	221094	3.8822e+07	4.61046e+07	4.91612e+07	2.18781e+07	1.77069e+07	2.102e+07	1617.62	3.12769e+07	1.96243e+07	88702.3	1.66761e+07	9.47215e+07	4.25575e+07	4.63646e+06	3.91161e+06	8.51602e+06	187703	67076.3	80350.4	240265	4.64819e+06
CLA829_A	1.12774e+06	1.09698e+07	7.10437e+06	503604	3.73697e+06	957078	4.14319e+06	7.78709e+06	1.65018e+06	4.79535e+06	4.38984e+06	835712	46719.2	8.20515e+06	1.38505e+07	1.24093e+08	3.32708e+06	4.52379e+06	295269	1.97788e+07	304293	3.81225e+07	5.08717e+06	8.29704e+06	1.39668e+07	2.38225e+08	5.1077e+07	2.59806e+06	1.18509e+07	9.48109e+07	8.90516e+06	1.92454e+07	9.25239e+06	4.91165e+08	718771	96158	2.05445e+06	365319	1.04748e+08	5.22365e+06	7.46445e+07	5.56282e+07	4.67082e+07	9.14885e+06	312426	328369	2.8059e+06	693341	2.17732e+07
CLA830_A	279886	1.45915e+06	439852	138766	6048.79	285630	9200.86	165419	208.61	29094.8	246817	6.32002e+06	724187	1.4848e+07	4.68427e+06	3.53493e+07	3.02091e+08	8.82689e+06	28347	966559	1.93024e+06	7.14309e+07	3.63365e+07	3.9572e+07	2.21313e+06	1.0924e+08	4.66405e+07	2910.61	1.17287e+08	1.00052e+09	7.13408e+07	2.33758e+07	4.43701e+06	1.80189e+08	4.11326e+06	3.62596e+08	1.09834e+08	4.03584e+06	3.60362e+07	7.91298e+07	9.00735e+08	19608.4	137422	1.67197e+07	58907.4	139691	28403.6	273264	2.21131e+06
CLA831_A	86633	1.32493e+06	1.03687e+07	13127.7	388942	9010.37	1.98917e+06	3.26941e+06	2.00618e+06	2.34346e+06	550642	4.45885e+06	30165.9	7.66006e+06	1.44869e+07	1.01482e+08	1.65357e+08	2.51509e+07	305732	127928	583709	7.99293e+07	3.98197e+07	2.7972e+07	1.80149e+06	2.07557e+06	7.53236e+07	671313	2.85448e+07	5.13526e+07	6.20687e+07	1.74373e+07	4.26407e+07	1.356e+07	316983	4.12051e+07	2.81152e+07	758050	5.4924e+06	4.33902e+07	1.5932e+08	2.51136e+07	1.98691e+07	4.18022e+07	1.59649e+06	75842.7	111471	738359	1.97995e+07
CLA832_A	104108	1.77145e+06	1.29226e+06	716886	1.82032e+06	204376	1.79585e+06	1.70261e+06	187831	897387	1.10605e+06	1796.19	209550	448841	2.37068e+06	1.70669e+07	3.87688e+06	16078.2	182115	1.03635e+06	292666	6.81388e+06	1.84543e+06	4.26621e+06	3.91479e+06	8.1314e+06	4.38145e+06	403369	3.75982e+07	305740	1.33942e+06	6.48234e+06	43640.4	3.49616e+07	101733	8.5422e+06	820597	4.19202e+06	3.54532e+07	6.0077e+06	10848.7	5.03321e+06	5.66019e+06	1.53506e+06	99444.3	171815	401669	260001	3.4794e+06
CLA833_A	32328.2	897946	1.44512e+06	899750	1.80507e+06	107774	1.77177e+06	1.30707e+06	138765	652993	757232	171725	366370	2836.36	1.31273e+06	1.02426e+07	5.56969e+06	60909.9	128329	526349	286190	6.35007e+06	2.15424e+06	3.65577e+06	2.44035e+06	2.22908e+06	3.22892e+06	245780	2.00987e+07	1.66182e+06	1.55058e+06	4.48225e+06	14758.9	1.1223e+07	142948	8.17928e+06	2.2395e+06	2.49569e+06	1.10848e+07	5.9468e+06	1.75265e+06	3.02502e+06	3.82984e+06	2.27908e+06	119565	183582	292583	274543	3.25031e+06
CLA834_A	73269.6	1.68111e+06	406298	1.93403e+06	3.82927e+06	508700	2.12933e+06	1.45643e+06	5076.2	577597	1.33232e+06	185494	690606	1.83881e+06	659880	6.36417e+06	1.13716e+06	272080	283811	922199	224726	3.14868e+06	411882	1.52132e+06	2.51253e+06	4.03141e+06	650714	245410	8.72482e+06	86036	4458.99	2.27284e+06	942117	1.34125e+07	122031	3.0054e+06	78239.2	2.41686e+06	1.05541e+07	420573	132560	2.3828e+06	3.52545e+06	319689	566883	271592	582513	224846	2.19731e+06
CLA835_A	100157	2.36708e+06	3.26428e+06	2.05454e+06	5.07405e+06	458436	3.872e+06	3.66784e+06	317734	1.29238e+06	1.74054e+06	84754.5	568026	273450	747944	6.91309e+06	3.45274e+06	37854	146454	717434	224089	5.27776e+06	1.36896e+06	2.05728e+06	1.90878e+06	2.81822e+06	2.24944e+06	264735	5.39888e+06	99236.8	656441	2.73331e+06	9071.55	8.64995e+06	43524.2	2.75508e+06	489315	939687	5.94009e+06	1.95161e+06	223123	3.648e+06	5.13196e+06	2.80127e+06	171458	311131	639125	374036	5.14494e+06
CLA836_A	51740.2	257574	317671	75276	3923.77	81204.4	39330.7	6719.64	7125.23	1098.94	32005.2	1.87986e+06	203194	3.19777e+06	782331	4.66833e+06	2.21479e+07	1.47103e+06	4112.76	27217.9	270495	7.917e+06	5.61024e+06	6.44726e+06	520716	6.32719e+06	8.38616e+06	8896.23	3.66902e+07	1.2332e+08	1.96772e+07	8.4832e+06	1.36937e+06	9.54309e+06	583186	4.1408e+07	2.85927e+07	1.62483e+06	7.87002e+06	6.81407e+07	6.21121e+07	123344	176066	3.43129e+06	4715.17	42323	163.481	88507.1	801541
CLA837_A	187.335	2601.36	864284	411.153	9283.09	22237.5	145515	164592	181755	135192	6478.59	989379	68.7108	1.60728e+06	1.04667e+06	4.25233e+06	1.19654e+07	3.89341e+06	45266	15387.3	65035	4.97029e+06	4.84183e+06	4.50403e+06	99515.6	735659	1.73939e+07	26298.7	1.63078e+07	5.7548e+07	4.76424e+07	1.23089e+07	1.72348e+07	399890	1266.3	1.5517e+07	2.16592e+07	556819	261613	1.77866e+08	3.15964e+07	812951	598742	3.14473e+06	163351	6982.41	112.672	60538	1.16997e+06
CLA838_A	99601.7	1.01819e+06	718809	360250	839888	496874	100268	94325.6	129756	23815.1	522014	3.80484e+06	83189.1	1.05513e+07	3565.18	353627	1.3441e+07	5.93435e+06	482647	1.77372e+06	1573.64	1.44847e+06	3.26674e+06	695603	1.58949e+06	1.86252e+07	4.97026e+06	93196.7	567135	4.88345e+07	1.66673e+07	127591	1.1943e+07	5.58011e+07	24906.2	2.78572e+06	1.00499e+07	2.96595e+06	3.21893e+07	1.84009e+07	4.48353e+07	278733	473721	4.7199e+06	761688	41706	366009	592.545	128577
CLA839_A	106492	1.21007e+06	340812	364772	1.00402e+06	490142	214754	245856	57243.9	73122.7	604899	2.83251e+06	57281.6	7.31712e+06	27028.1	524382	5.16686e+06	2.38294e+06	233335	899647	2889.99	378050	1.35618e+06	196232	1.00096e+06	9.20028e+06	1.35002e+06	82045.7	569353	2.14421e+07	6.09103e+06	92.3529	4.19909e+06	2.42568e+07	6745.9	1.02105e+06	5.08314e+06	1.60954e+06	1.82508e+07	7.58093e+06	1.91281e+07	419744	620306	2.31217e+06	430694	37093.6	284245	677.49	4262.99
CLA840_A	175557	2.0454e+06	56279.2	452074	1.39075e+06	551075	531792	671099	6245.31	250911	962345	2.62119e+06	59420.5	7.4137e+06	215796	2.4078e+06	4.95796e+06	2.062e+06	286574	1.36069e+06	14980.5	47074.8	1.04502e+06	33856.8	1.87445e+06	1.51469e+07	525663	179073	2.49289e+06	3.55023e+07	5.29324e+06	196175	4.06957e+06	4.30067e+07	4191.3	928429	6.65224e+06	2.4546e+06	3.29489e+07	5.88871e+06	2.94198e+07	1.41865e+06	1.78519e+06	1.57196e+06	377863	61730.3	406477	13818.6	122918
CLA841_A	4.35793e+07	3.3868e+08	2.05465e+08	779772	1.09111e+07	6.69052e+06	3.23899e+07	1.30983e+08	4.05136e+07	8.31943e+07	4.27257e+07	1.81715e+07	2.5985e+07	1.3573e+08	2.64188e+06	3.70416e+07	2.41747e+07	2.20841e+07	1.75707e+06	6.23087e+06	1.85993e+06	7.85355e+06	1.25907e+06	498.348	290507	6.37248e+07	1.34321e+07	5.57127e+06	713879	1.86236e+07	2.15915e+06	870869	7.60673e+06	1.95833e+07	1.38742e+06	8.44282e+06	2.45892e+06	875553	5.05424e+06	267636	3.38822e+07	5.83802e+08	1.05729e+09	2.76916e+08	4.91234e+07	119124	1.3004e+07	3.40327e+06	5.94445e+08
CLA842_A	262624	6.01524e+06	7.4384e+06	9.39512e+06	1.08222e+07	3.17672e+06	2.08987e+06	137258	2.54897e+06	115249	4.47874e+06	1.66792e+07	9.56298e+06	1.06973e+08	2.7316e+06	7.90892e+07	6.07449e+06	5.03061e+07	1.29263e+07	3.21e+07	4.62777e+06	2.06244e+07	2.56057e+06	3.85322e+06	3.38427e+07	5.83927e+07	4.91292e+06	2.56242e+06	2.20843e+07	5.69651e+06	1.2461e+07	1.99174e+06	3.35304e+07	6.73858e+07	1.87766e+06	1.36346e+07	1.18474e+06	1.04689e+07	1.6775e+07	1.96876e+06	3.67654e+07	1.50237e+07	3.82246e+07	4.03851e+07	2.52899e+07	3.56829e+06	1.02493e+07	1.02467e+06	1.52114e+06
CLA843_A	400894	4.30722e+06	8.74692e+06	466806	163334	77791.7	1.92787e+06	7.2018e+06	3.01864e+06	2.10564e+06	925899	8667.06	1.1537e+06	2490.41	154135	526859	6058.03	2.12004e+06	163181	4058.83	63361.6	118071	281032	726.233	83147.7	2.10442e+06	2.57683e+06	46902.7	1.44032e+06	4.01615e+06	2.34006e+06	224052	4.31324e+06	2.24778e+06	439539	2.13808e+06	271584	1.55161e+06	1.63985e+06	1.28157e+06	1.18518e+06	2.84987e+06	2.37146e+06	2.35459e+06	1.53174e+06	27577.4	12388.9	19597.8	2.85226e+06
CLA844_A	5.63919e+06	4.51951e+07	8.15756e+06	5.7503e+06	76244.1	4.20372e+06	1.21909e+06	2.44376e+07	5.41256e+06	5.62322e+06	5.0857e+06	4.38405e+07	1.783e+07	1.32877e+08	158597	4.56899e+06	9.38011e+07	417538	974037	164738	2.43883e+06	3.71856e+07	8.54914e+06	6.94069e+06	1.76914e+06	2.13253e+07	152887	20117.6	7.42356e+06	3.25442e+07	357883	1.00974e+06	2.12544e+06	6.80475e+06	1.10663e+06	2.28969e+07	7.90974e+06	1.68531e+06	1.9106e+06	1.39212e+06	5.01885e+07	6.2499e+06	3.75618e+06	2.63492e+07	1.00844e+07	1.77144e+06	98169.8	897825	43463.3
CLA845_A	1.13446e+07	5.6551e+07	9.329e+06	7.9663e+06	468439	1.09493e+06	244693	1.63049e+07	8.25819e+06	8.01667e+06	3.39953e+06	3.43112e+07	3.04872e+07	8.17978e+07	2.02274e+06	8.08953e+07	7.3569e+08	6.00453e+06	7.26316e+06	312141	2.34558e+07	3.9307e+08	4.83224e+07	3.89315e+07	1.75548e+07	3.96208e+07	278090	73756.6	2.49285e+07	6.99933e+07	163524	2.89079e+06	8.82511e+06	4.23441e+06	4.5871e+06	8.21355e+07	1.96624e+07	5.63561e+06	895595	1.55142e+06	1.85575e+08	2.49222e+07	3.63204e+06	8.95014e+07	3.42625e+07	5.73407e+06	336927	4.98408e+06	2.90899e+06
CLA857_A	14817.3	12081.8	237489	805773	535216	29346	86896.4	62408	278905	13278.3	53253.2	1121.76	841908	177944	709685	6.70935e+06	3.02451e+06	1.82266e+06	520734	549409	463325	3.07412e+06	394819	3.62191e+06	4.4153e+06	339644	57705.7	95088.2	1.27258e+08	1.99216e+07	2.46533e+06	3.93566e+06	1.54281e+07	1.0532e+07	2.47959e+06	3.66007e+07	5.4755e+06	3.07903e+07	1.79821e+07	214831	3.79923e+06	107131	400602	1136.4	1.05677e+06	159277	142980	79906	105410
CLA801_B	66253.4	4.13338e+06	6.64045e+06	1.17196e+07	1.8102e+07	1.41572e+06	9.31508e+06	5.71307e+06	51519.2	2.49475e+06	4.3201e+06	1.54929e+06	6.98797e+06	459484	2.28718e+06	3.02667e+07	2.98924e+07	85248.4	1.43584e+06	4.278e+06	1.69106e+06	3.6642e+07	6.12566e+06	8.31512e+06	8.38679e+06	5.4355e+06	4.89982e+06	1.00251e+06	1.3067e+07	2.86866e+06	719067	5.96276e+06	925276	1.56013e+07	386761	1.32675e+07	2.07175e+06	2.81754e+06	6.24664e+06	2.33338e+06	3.89177e+06	1.37405e+07	2.47146e+07	1.81396e+07	3.73373e+06	2.58579e+06	4.56064e+06	2.1121e+06	2.66959e+07
CLA802_B	204889	5.12036e+06	1.07595e+06	5.14932e+06	9.49299e+06	1.36225e+06	5.30262e+06	3.69488e+06	719.137	1.51031e+06	3.44892e+06	476214	2.3105e+06	6.54229e+06	2.03528e+06	2.404e+07	5.56004e+06	957989	1.01239e+06	3.28155e+06	864490	1.35434e+07	1.3983e+06	4.53468e+06	7.38712e+06	1.09124e+07	1.53122e+06	775929	1.85366e+07	31840.8	16088.2	4.2281e+06	2.43195e+06	2.865e+07	353593	8.96403e+06	256768	4.3819e+06	1.50154e+07	562952	172446	8.88894e+06	1.43577e+07	1.35892e+06	2.06305e+06	947027	2.07498e+06	801868	8.46169e+06
CLA803_B	3818.06	1.20212e+06	46254.3	1.89272e+07	2.69063e+07	1.57275e+06	1.20884e+07	1.40272e+06	1.11446e+06	475462	2.89202e+06	163321	6.62584e+06	1.10223e+06	305901	4.32608e+06	3.05427e+06	395488	363791	510251	434444	4.70819e+06	758488	1.52531e+06	1.9158e+06	419582	175785	211607	3.32243e+06	632368	1428.02	823123	693764	1.49191e+06	160704	2.66781e+06	440071	1.09301e+06	926411	176993	526866	1.63005e+06	4.53177e+06	1.37549e+06	2.90212e+06	1.06479e+06	1.12475e+06	861780	5.05992e+06
CLA804_B	3.9477e+06	5.7817e+07	1.47952e+07	1.33811e+07	57657.1	6.28936e+06	2.29959e+06	8.178e+07	1.12632e+07	4.75644e+06	5.07662e+06	2.87489e+07	1.15565e+07	3.2061e+07	31173	670961	6.90322e+06	55307	117427	1941.89	356199	3.706e+06	1.286e+06	1.10542e+06	333242	1.58385e+06	30037	200.628	1.35985e+06	3.74337e+06	51373.3	199732	283066	471153	171991	2.81762e+06	1.41081e+06	371431	212092	282957	4.72806e+06	583270	286500	4.78302e+06	2.83572e+06	636330	345.092	460709	164480
CLA805_B	2.41769e+06	2.69612e+07	2.40772e+07	2.30121e+07	5.12566e+06	1.36547e+06	226305	4.79601e+07	1.25229e+07	3.39216e+06	1.45596e+06	1.20222e+07	1.56524e+07	1.02916e+07	59840.3	1.33249e+06	6.33273e+06	574651	338231	51974.5	506857	4.23535e+06	933710	1.32372e+06	902427	924502	129.27	10157	2.34846e+06	3.67295e+06	3610.46	314596	949328	96745.3	270041	3.78269e+06	1.26395e+06	847999	34181.2	162956	3.86454e+06	298061	6365.78	1.46126e+06	5.77535e+06	1.12387e+06	169170	535925	126859
CLA806_B	1.08128e+06	1.61083e+07	7.90665e+06	3004.66	7.34366e+06	3.99844e+06	7.34052e+06	2.56372e+07	2.9467e+06	3.3114e+06	4.90945e+06	6.13881e+06	1.04228e+06	1.17223e+07	26785	189657	1.05147e+06	17320.1	963.287	156571	20084.9	55887.8	93862.6	47460.2	29255.4	2.38008e+06	85389.1	65386.2	84215	2.26673e+06	1410.07	14835.3	96153.8	2.02958e+06	51964.6	623402	565488	31747.8	1.1584e+06	38503	2.20686e+06	1.74556e+06	2.24336e+06	50179.7	307564	212.857	320834	8321.96	1.52274e+06
CLA807_B	318923	1.57695e+06	1.31113e+07	1.74261e+07	1.12841e+07	507195	267767	6.62703e+06	5.92079e+06	726092	74012.3	3814.46	9.91727e+06	1.80224e+06	76162.9	1.64516e+06	1.75253e+06	2.02727e+06	605028	418427	399096	2.17261e+06	122159	839161	1.59811e+06	130.632	139565	57160.1	2.89783e+06	1.27936e+06	415199	355887	2.32148e+06	440069	281278	2.98755e+06	368489	1.51435e+06	266787	1528.14	663847	1433.38	272793	254701	6.31957e+06	1.0051e+06	747320	278797	27160.5
CLA808_B	7796.3	209292	253867	8.20833e+06	9.91792e+06	436512	3.53649e+06	413019	226030	237668	1.04324e+06	627002	4.03919e+06	40249.5	399670	4.94647e+06	4.90895e+06	256820	389606	605198	433722	5.75588e+06	1.16727e+06	2.0767e+06	2.14659e+06	376128	497280	180922	5.0424e+06	1.64045e+06	30596.7	1.59448e+06	825755	2.32163e+06	208579	4.39465e+06	912269	1.52505e+06	1.45578e+06	647419	1.38845e+06	1.35715e+06	3.06395e+06	1.96418e+06	1.99522e+06	777294	852295	533474	3.63659e+06
CLA809_B	1732.68	310126	6.18153e+06	824188	1.83487e+06	1247.53	2.70662e+06	2.35974e+06	652465	797161	410077	3.08789e+06	292789	2.84886e+06	338612	2.9271e+06	5.26604e+06	650339	7361.89	62216.8	126600	4.26157e+06	1.98876e+06	1.57038e+06	453174	32733.6	2.20461e+06	79602.2	2.03068e+06	1.80824e+06	1.64201e+06	1.43556e+06	270269	538351	16604.4	2.084e+06	1.35214e+06	118890	412170	2.73345e+06	2.58455e+06	1.55075e+06	2.21091e+06	6.00435e+06	3815.9	140656	120773	297679	4.45154e+06
CLA810_B	1.57906e+06	3.43651e+07	1.85347e+08	6.31151e+06	3.5583e+06	456260	5.50524e+07	2.19657e+08	4.41902e+07	1.31758e+07	6.62029e+06	1.7942e+06	4.57948e+06	1.28131e+06	40713.5	218090	88428.2	1.07316e+06	77484.8	138.331	15487.2	226184	282919	22905.6	17170.5	285369	704160	31117.3	50960	131129	449607	69840.2	651815	157966	50208	105276	424.06	151229	89414.5	209052	14243.1	2.23511e+06	2.9372e+06	6.34268e+06	3.01288e+06	41860.4	15958.9	111072	8.64348e+06
CLA811_B	562959	1.19819e+06	26542	1.39894e+08	2.18596e+08	1.80228e+06	9.56494e+07	1.48786e+06	1.21217e+07	136870	3.78411e+06	9.66071e+06	2.11196e+07	851336	98602.2	1.54369e+06	2.26709e+06	115445	177369	142735	286301	2.89537e+06	678933	813628	775115	3233.5	95521.3	96266.3	901164	503903	7206.77	309723	192598	146457	67787.8	1.06893e+06	322857	322572	91099.6	108823	602500	582556	2.46187e+06	3.26669e+06	3.88691e+06	1.65043e+06	914983	1.42701e+06	6.34423e+06
CLA812_B	397806	3.389e+07	3.5669e+07	9.05866e+07	2.55351e+08	1.96443e+07	1.60722e+08	1.24889e+08	10775.6	7.61262e+06	2.29203e+07	3096.65	1.14203e+07	6.05541e+06	223817	3.16565e+06	1.60918e+06	102221	230166	465346	287498	3.68879e+06	617958	914962	1.29712e+06	725127	275265	284216	1.11222e+06	51140.6	8225.55	525386	152129	1.18434e+06	41180	834826	110397	367036	653973	106784	55537.1	3.596e+06	9.69415e+06	3.62541e+06	2.69447e+06	1.84477e+06	2.40707e+06	1.84102e+06	1.65832e+07
CLA813_B	1.83534e+06	4.76412e+07	4.53223e+07	2.29304e+07	1.80026e+08	3.49492e+07	8.23617e+07	1.60907e+08	6.5041e+06	1.07668e+07	2.38573e+07	7.95411e+06	219334	2.12464e+07	96056.6	1.11475e+06	2350.81	1118.44	43423.1	327401	24098.4	589609	46750.6	119978	408154	1.53796e+06	207118	175321	137107	301005	3752.44	204472	247.291	1.45696e+06	412.472	4699	33694.2	41980.9	775879	12165.1	338298	3.14332e+06	6.07291e+06	612467	66861.9	419371	1.66763e+06	451910	8.60749e+06
CLA814_B	1604.96	4.50899e+06	5.34301e+06	2.38607e+08	5.61765e+08	3.99511e+07	7.20784e+07	5.62337e+06	9.59165e+06	684270	1.30967e+07	1.61452e+06	2.22084e+07	1.17173e+07	66420	1.09765e+06	487551	461249	240752	294138	178903	1.30613e+06	116830	371535	802088	255013	7154.33	119265	563897	43059.6	32173.8	209315	316157	491846	41772.8	474582	39525.3	302846	269341	4949.5	15697.9	713014	2.5471e+06	62255.3	5.52441e+06	1.83838e+06	1.97354e+06	835570	3.39846e+06
CLA815_B	9.1575e+06	2.21196e+08	2.84338e+09	3.38889e+08	5.94552e+07	3.80094e+07	3.89404e+08	3.4141e+09	3.25401e+08	7.6138e+07	5.04565e+07	1.67897e+07	6.89825e+07	1.20162e+07	30326.7	135527	21138.9	2.25745e+06	225699	1422.09	59064	144078	290280	2487.42	75188.4	418154	860489	41572.5	90035.6	184151	451186	44116.2	808888	137266	63216.6	196301	8178.76	178339	60467.4	139883	51476.4	4.37272e+06	6.43792e+06	2.144e+07	1.95661e+07	668659	13956.8	208381	3.40288e+07
CLA816_B	1.06937e+06	9.18611e+07	4.68791e+08	5.03401e+08	1.65772e+09	2.17533e+08	3.74427e+08	5.58306e+08	4.2485e+06	2.86508e+07	7.08837e+07	1.80781e+07	5.1584e+07	6.24549e+06	351882	5.22254e+06	4.64267e+06	2495.62	382694	891387	539335	9.12065e+06	1.75797e+06	1.62788e+06	1.9098e+06	977693	852169	547369	1.1324e+06	151842	110244	881024	64073.5	1.42348e+06	40133.8	1.14786e+06	233807	318233	649401	261677	279569	8.96839e+06	2.57196e+07	2.85775e+07	6.24736e+06	7.94534e+06	1.1255e+07	6.06219e+06	7.88645e+07
CLA817_B	9.45508e+06	1.94757e+08	3.17813e+08	1.08028e+07	8.64034e+07	8.83683e+07	9.54681e+07	6.99277e+08	5.22868e+07	3.03148e+07	3.97366e+07	4.97259e+07	1.93602e+07	7.87918e+07	23336.1	125251	1.70407e+06	356668	53186.8	135974	96766.7	197149	93704.7	103652	1169.85	2.62175e+06	230416	104120	184171	1.79221e+06	25187	5616.38	339765	1.28418e+06	87832.3	823333	457818	111991	570769	3740.61	2.03495e+06	4.96005e+06	7.59833e+06	108190	4.83873e+06	157067	975820	9723.54	1.11807e+07
CLA818_B	2.49426e+07	7.3172e+08	1.07889e+08	7.16589e+07	2.48975e+07	2.22698e+08	5.24814e+07	2.39804e+09	6.00222e+07	2.58756e+07	5.37571e+07	3.26068e+08	4.36627e+07	2.97191e+08	16338.3	356540	7.47943e+06	14317.6	47657.4	47400	326214	4.0646e+06	1.70133e+06	886161	119253	1.82567e+06	84162.4	9348.44	514538	2.32882e+06	123516	121065	49676.5	541260	84615.9	1.55202e+06	994333	112906	222105	235875	3.74264e+06	1.09353e+06	1.18515e+06	2.2877e+07	3.75915e+06	1.30501e+06	270679	1.26543e+06	1.01279e+06
CLA819_B	222806	4.54661e+07	3.67649e+07	4.37112e+08	1.54356e+09	7.51284e+07	7.33229e+08	3.87492e+08	3.60074e+06	9.44479e+06	4.85849e+07	5589.61	2.78078e+07	8.19429e+06	127469	1.94521e+06	1.10235e+06	165166	216022	331292	249527	2.59259e+06	412884	634204	983459	368123	117810	220088	666323	55468.6	115.646	320879	156359	601503	35437.8	568955	79598.5	265329	326081	47146.5	53249	2.31441e+06	7.38456e+06	2.51155e+06	4.68131e+06	2.67394e+06	2.75842e+06	2.2776e+06	1.54308e+07
CLA820_B	2.69937e+07	1.73096e+09	3.37779e+10	7.67727e+07	6.83725e+08	4.05081e+07	6.91104e+09	8.96452e+10	1.77353e+09	2.65272e+08	1.93027e+08	6.84727e+07	3.65922e+07	2.22062e+07	99182.4	831872	650185	2.16012e+06	113114	10681.3	3998.29	1.41974e+06	982456	157928	278.265	460573	1.20668e+06	145556	2157.14	51352.4	551991	159983	658199	235977	39238.7	21103	8696.58	82902.2	111153	242035	1235.61	9.35663e+06	1.92037e+07	5.32525e+07	1.42952e+07	12582.7	446275	2.21724e+06	1.03685e+08
CLA821_B	1.51851e+08	1.30718e+10	1.4094e+11	8.09171e+07	7.19221e+08	2.46625e+08	6.5184e+09	1.36304e+11	2.81233e+09	6.85185e+08	5.43796e+08	4911.86	1.006e+08	6.27723e+06	133900	1.1648e+06	23305.6	2.60839e+06	171753	81400.5	50275.3	959264	605188	50373	847.691	1.72825e+06	1.37425e+06	340024	34683.4	498677	471159	142582	832453	722330	86694.7	229123	38243.4	127379	308161	144779	334120	2.27224e+07	5.38324e+07	7.66396e+07	2.82081e+07	134644	2.15948e+06	3.45413e+06	2.5913e+08
CLA822_B	8.48269e+07	3.15912e+09	1.13584e+10	4.95626e+07	6.13546e+07	4.24736e+07	6.34131e+08	6.88836e+09	5.99515e+08	2.63074e+08	1.47489e+08	2.52434e+06	7.8586e+07	9.12524e+06	135892	914778	157576	4.01979e+06	404182	50752.8	221131	294085	408221	45.0195	55488.5	2.69054e+06	1.80806e+06	304022	232141	1.25705e+06	671720	99910	1.56779e+06	992474	196079	836055	159178	333090	403074	153261	1.02621e+06	2.79876e+07	5.79265e+07	7.18535e+07	3.31886e+07	805175	1.01639e+06	1.1244e+06	2.01835e+08
CLA823_B	1.43511e+07	4.24468e+08	2.50763e+09	2.50826e+07	2.67383e+07	8.03929e+06	2.91243e+08	2.22166e+09	2.26384e+08	7.76214e+07	4.13121e+07	4.62144e+06	2.49512e+07	2.76644e+06	112423	731598	114967	3.02369e+06	241837	7678.53	63340.3	685212	677567	38089.3	32020.1	1.11218e+06	1.64781e+06	133523	109155	455123	805023	134191	1.35673e+06	508916	120024	319848	14945.6	266923	232613	284373	152487	1.10174e+07	1.84468e+07	3.64723e+07	1.37333e+07	206776	205517	613684	6.23867e+07
CLA824_B	1.28197e+07	2.58359e+08	4.28883e+06	1.97668e+07	1.12024e+08	9.34873e+07	3.63689e+07	1.3272e+08	33516	1.27837e+07	4.63144e+07	2.38906e+08	215187	8.70038e+08	63681.3	1.36886e+06	1.1131e+07	2.89225e+06	484612	2.42876e+06	447.895	789675	2.08185e+06	141401	1.20698e+06	9.81421e+06	245224	527426	30608.6	4.36526e+06	903134	12261.8	557938	5.82642e+06	3231.67	511308	1.37753e+06	148713	2.16063e+06	484840	9.17569e+06	9.38646e+06	2.46002e+07	5.3509e+07	3.85331e+06	1.02029e+06	1.18812e+07	132680	4.09935e+06
CLA825_B	2.49674e+06	1.37187e+08	1.00767e+09	1.88074e+08	5.69923e+08	6.94685e+07	2.47966e+08	5.15176e+08	2.08736e+07	4.87993e+07	6.53927e+07	7.84413e+07	3.43906e+07	1.05033e+07	726963	1.06545e+07	1.29151e+07	522793	356422	1.39422e+06	853227	2.1988e+07	4.69344e+06	3.10139e+06	2.63278e+06	1.65101e+06	2.72765e+06	964627	1.56749e+06	321450	614110	1.58977e+06	8218.75	2.22875e+06	30474.8	1.79658e+06	508132	269460	914865	716405	893267	2.30588e+07	6.25721e+07	1.23768e+08	2.21358e+06	1.06213e+07	1.86497e+07	1.07126e+07	2.17674e+08
CLA826_B	1.41473e+06	2.11252e+07	1.45002e+08	4.87566e+06	741803	11649.4	1.59644e+07	7.85383e+07	2.24103e+07	1.11517e+07	3.68192e+06	7.20424e+06	6.64907e+06	1.247e+07	160317	882021	1.17427e+06	5.08104e+06	368901	6740.61	37934.1	1.4272e+06	1.36846e+06	153323	85719.3	715148	3.35252e+06	67081.2	149416	192791	2.22468e+06	310192	3.04943e+06	408242	162182	248710	24201.5	536242	189518	1.06126e+06	24280.2	6.27055e+06	7.32338e+06	2.54425e+07	8.0416e+06	104220	6303.92	229851	2.12797e+07
CLA827_B	367452	97527.4	640807	7.62235e+07	9.10405e+07	3.28395e+06	1.97718e+07	186611	5.30498e+06	111132	3.25392e+06	5.72618e+06	2.73804e+07	499.686	299965	4.93602e+06	6.75535e+06	645166	673117	700894	760534	8.58025e+06	1.40084e+06	2.09037e+06	2.38947e+06	85797.9	204348	245959	2.91982e+06	1.39819e+06	347.241	928953	860055	857545	206687	3.44238e+06	719685	1.03405e+06	446818	232554	1.49473e+06	1.53503e+06	5.94326e+06	5.10095e+06	9.17612e+06	3.37486e+06	2.95034e+06	1.96376e+06	1.08137e+07
CLA828_B	1.46806e+06	4.92988e+07	1.1652e+08	1.50286e+07	5.54467e+07	5.06093e+06	6.70157e+07	1.07326e+08	8.27411e+06	1.54148e+07	1.70591e+07	2.17566e+06	2.10739e+06	371706	830596	1.01739e+07	6.44171e+06	348894	134036	843627	402335	1.1719e+07	2.8308e+06	2.40356e+06	1.98431e+06	2.46033e+06	2.44402e+06	631380	2.12859e+06	39944.5	645796	1.52236e+06	45390.5	3.58398e+06	11450.9	1.45687e+06	342255	268424	1.81902e+06	854507	261624	1.44624e+07	2.93046e+07	2.48039e+07	117259	1.36159e+06	2.7178e+06	2.63102e+06	4.75519e+07
CLA829_B	6.25974e+06	2.01897e+08	4.01599e+09	5.49428e+06	1.71248e+06	7.85203e+06	1.18934e+08	5.60604e+08	1.98704e+08	1.17795e+08	1.11255e+07	4.07871e+08	1.23665e+07	8.14945e+08	555908	6.07436e+06	2.8105e+07	1.37966e+07	681427	85659.4	64503.2	2.73031e+07	1.30263e+07	2.40094e+06	3106.96	6258.01	6.48846e+06	302688	62614.6	721100	3.22901e+06	758546	2.75765e+06	4808.64	51813	339094	1.00314e+06	195000	3560.71	1.46043e+06	4.25848e+06	4.40314e+07	1.12468e+08	9.43878e+08	3.8042e+07	14587.7	6596.49	1.31548e+07	7.3797e+08
CLA830_B	2.606e+06	8.88804e+07	1.57951e+09	236962	7.49226e+06	3.58261e+06	6.78943e+07	1.80015e+08	8.88218e+07	1.07866e+08	1.23973e+07	5.53728e+08	413613	1.88474e+09	1.67694e+06	2.61397e+07	1.19063e+08	2.60747e+07	579268	98.4124	1.29052e+06	1.33786e+08	3.78369e+07	8.38609e+06	531672	16790.2	1.32332e+07	1.38298e+06	731691	2.43276e+06	5.11738e+06	1.93844e+06	3.22282e+06	93755	8918.69	2.33648e+06	2.45467e+06	43487.9	40759.2	2.34421e+06	1.23006e+07	1.63477e+08	5.73297e+08	4.5388e+09	4.23044e+07	3.29335e+06	1.72748e+06	4.73949e+07	2.73859e+09
CLA831_B	403570	716985	2.15295e+08	1.43855e+06	474559	6.97878e+06	5.4584e+06	1.42608e+07	1.87071e+07	1.39377e+07	110391	3.42253e+08	2.49313e+06	2.74062e+09	1.74959e+06	2.49268e+07	4.36379e+08	9.4882e+07	5.72473e+06	5.5609e+06	1.00779e+06	2.9817e+08	7.24904e+07	1.20684e+07	185456	8.69866e+06	2.92414e+07	216179	387166	8.92967e+06	1.21144e+07	2.39484e+06	9.64795e+06	1.59917e+06	33760.3	4.04739e+06	5.30485e+06	367261	322737	4.35215e+06	4.42293e+07	1.00662e+08	1.76062e+08	4.92055e+09	7.94662e+07	40413.3	6.38413e+06	1.16139e+07	8.54271e+08
CLA832_B	12104.4	820969	8.82856e+07	267093	60632.1	1.85059e+06	4.80899e+06	1.09111e+07	1.01271e+07	1.01455e+07	335391	1.28409e+08	1.1761e+06	8.05713e+08	3.51386e+06	5.00779e+07	6.10441e+08	1.51513e+08	6.82926e+06	3.84081e+06	1.34876e+06	3.86742e+08	8.4781e+07	1.80737e+07	25553	4.6986e+06	5.83443e+07	800632	872326	1.06887e+07	2.06757e+07	5.3222e+06	1.69054e+07	352252	64408.2	6.17722e+06	6.49585e+06	407013	43446	7.14038e+06	5.53307e+07	1.14675e+08	1.35032e+08	1.63642e+09	4.86014e+07	286212	274379	6.19936e+06	3.40457e+08
CLA833_B	2.09983e+06	2.67024e+06	1.2713e+07	1.05863e+09	1.3132e+09	1.68025e+08	1.68827e+08	1.10775e+07	2.34988e+07	5.41616e+06	4.69814e+07	1.63663e+08	4.02518e+08	18338.5	481738	9.40161e+06	1.50381e+07	1.08592e+06	1.81063e+06	1.94408e+06	1.98372e+06	2.44244e+07	3.41326e+06	3.49765e+06	4.47644e+06	289126	506922	854870	2.36855e+06	1.13879e+06	12203.2	1.1989e+06	783062	1.10635e+06	206382	3.49481e+06	702762	880854	449492	235246	1.66087e+06	8.71649e+06	4.18613e+07	6.67741e+07	7.26603e+07	4.26961e+07	4.59626e+07	1.79943e+07	1.66751e+08
CLA834_B	2.23419e+06	1.29964e+07	6.86119e+08	3.90073e+09	6.2863e+09	1.12785e+09	5.48612e+08	1.89185e+08	1.77807e+07	2.21206e+07	1.11739e+08	7.54596e+08	6.62856e+08	7.93058e+07	358940	6.52501e+06	1.12498e+07	219323	999866	1.08236e+06	1.37965e+06	1.80782e+07	3.27302e+06	2.68105e+06	2.9254e+06	155487	639117	693871	1.48237e+06	804975	66734.4	929575	293547	639027	117266	2.23619e+06	573438	504288	273790	254061	1.32851e+06	8.44558e+06	3.81824e+07	9.39427e+07	5.59372e+07	4.66706e+07	4.00406e+07	2.2252e+07	2.20382e+08
CLA835_B	3707.12	1.40934e+07	8.6834e+07	1.86055e+08	2.22846e+08	6.40185e+07	2.54805e+07	9487.15	2.04375e+07	232612	2.20714e+07	4.70995e+07	1.09664e+08	6.04881e+08	425857	1.01029e+07	2.8871e+06	9.19957e+06	3.76915e+06	5.24961e+06	1.83208e+06	1.28013e+07	162716	2.03181e+06	6.94794e+06	3.26723e+06	84978.3	959717	3.23975e+06	93075.3	751043	869316	3.58171e+06	4.47158e+06	321967	3.20078e+06	57902.9	1.79525e+06	1.61248e+06	19465.3	13662.7	5.7331e+06	2.84734e+07	7.65821e+06	6.9876e+07	1.87867e+07	3.73031e+07	4.91654e+06	2.00107e+07
CLA836_B	120567	3.66781e+07	1.63757e+08	1.90675e+08	1.91101e+08	6.69019e+07	2.50234e+07	31.745	3.05349e+07	294429	3.74871e+07	1.57005e+08	2.1971e+08	3.4268e+09	707169	2.08624e+07	3.71698e+06	2.35727e+07	9.79896e+06	1.38405e+07	4.4419e+06	2.96209e+07	47384	3.12628e+06	1.37094e+07	7.31573e+06	361478	2.39058e+06	4.11898e+06	22441.9	1.43522e+06	1.04471e+06	5.9166e+06	7.01008e+06	492256	4.34285e+06	18627	2.40479e+06	2.14589e+06	74484.7	277988	1.76172e+07	1.11469e+08	9.15696e+07	2.12277e+08	5.64377e+07	1.48342e+08	1.34858e+07	6.2027e+07
CLA837_B	610308	5.86621e+06	6.56303e+08	1.78728e+08	1.61945e+08	5.12272e+07	1.24479e+07	2.89129e+07	7.27011e+07	3.47665e+06	2.00809e+07	1.3943e+08	1.59314e+08	1.29714e+09	276949	1.00139e+07	620275	1.87686e+07	5.6769e+06	5.97144e+06	2.81148e+06	1.01417e+07	157755	1.52418e+06	8.61765e+06	2.79799e+06	1.1503e+06	1.06094e+06	3.36464e+06	48267.6	1.84847e+06	404030	5.76063e+06	3.51139e+06	489643	3.35724e+06	3306.01	2.19072e+06	1.21961e+06	211671	261813	1.86026e+06	3.09691e+07	1.47354e+08	1.30731e+08	2.60313e+07	4.42774e+07	6.40031e+06	279247
CLA838_B	429272	3.18107e+06	2.07007e+06	2.71701e+06	593472	64669.5	8835.19	3.43817e+06	1.86322e+06	621259	177392	1.41197e+06	2.96976e+06	1.11665e+06	105501	1.82814e+06	5.86272e+06	570667	272769	60729.9	418207	3.39602e+06	848241	1.78883e+06	1.1445e+06	944900	1693.98	10797.7	7.94676e+06	9.2256e+06	22701.7	580257	1.971e+06	95608.3	567234	8.49135e+06	2.82349e+06	2.34133e+06	38509.9	393551	6.86513e+06	131501	302.734	336371	1.85634e+06	296688	58566.6	159199	37639.5
CLA839_B	133844	2.72425e+06	6.76482e+06	3.75778e+06	6.18258e+06	2.41385e+06	641917	33056.1	1.49025e+06	2455.97	1.64199e+06	9.85033e+06	1.37954e+06	2.75777e+07	27187.1	907793	2.98559e+06	3.97774e+06	553934	1.10174e+06	75741.6	66908.5	1.11732e+06	4516.3	1.53454e+06	4.01655e+06	1.23816e+06	117469	1.24404e+06	2.87314e+06	2.93601e+06	13694.5	3.59904e+06	6.30612e+06	93027.4	36833.2	1.05715e+06	1.39848e+06	3.3689e+06	1.65505e+06	5.99244e+06	270526	1.01298e+06	7.94837e+06	2.83694e+06	282256	941946	18099.2	157488
CLA840_B	4.37043e+08	3.91161e+10	2.59145e+11	8.86523e+08	9.4641e+07	48996.8	9.81091e+08	3.95667e+10	4.47297e+09	1.00467e+09	1.95082e+08	4.2975e+07	5.91645e+08	9.92167e+07	5501.66	79995.3	544369	6.86659e+06	1.30171e+06	173043	880226	474542	185949	214660	1.15374e+06	540177	1.23827e+06	5238.41	675813	662357	697943	273.721	1.9857e+06	30545.1	240734	1.24303e+06	112949	630950	9541.32	99921.5	412248	1.61332e+07	2.62302e+07	1.54137e+08	1.39188e+08	1.60501e+07	2.26193e+06	624591	2.9572e+08
CLA316_F	1.37752e+07	9.48745e+07	1.72437e+06	8.79554e+06	2.08868e+07	8.92759e+06	1.15782e+07	1.70882e+07	246661	1.91834e+07	3.11625e+07	7.92719e+07	4.63569e+06	8.19049e+08	9.42899e+06	3.89349e+08	3.33208e+08	7.78742e+07	5.03176e+07	3.13131e+08	1.19265e+07	2.46862e+08	8.15652e+06	3.84162e+06	7.92135e+07	3.48305e+08	418180	3.6755e+07	3.85458e+06	2.4739e+07	3.1902e+06	2.96858e+06	6.26717e+06	8.67875e+07	30644.7	73.7578	4.52114e+06	2.2545e+06	1.54629e+07	414626	1.20166e+08	1.78402e+09	2.86155e+09	2.13011e+08	4.16636e+07	1.48279e+07	1.26753e+08	9.35125e+06	2.76937e+08
CLA317_F	3.57781e+07	1.12182e+08	1.89334e+09	4.85306e+08	1.8369e+08	6.25096e+07	175.359	1.97025e+08	2.01866e+08	8.16316e+07	3.36256e+06	6.35906e+08	1.67976e+09	6.50198e+10	86170.8	5.57525e+06	2.79769e+06	4.03012e+07	1.24438e+07	7.088e+06	4.95494e+06	1.29405e+07	191206	1.58285e+06	9.038e+06	184462	2.43563e+06	757614	2.21939e+06	585901	1.87663e+06	215297	6.30236e+06	891749	551012	3.5528e+06	95340.2	1.79134e+06	282267	171146	109659	4.76849e+06	2.93991e+06	1.32296e+09	1.31144e+09	2.87542e+08	5.56287e+08	1.70546e+07	1.94533e+08
CLA223_G	2.16513e+07	1.14868e+09	9.81217e+09	7.31095e+09	7.01412e+10	5.67717e+10	3.6773e+09	1.4536e+10	2.28473e+08	2.65904e+08	7.55267e+08	784145	7.60173e+07	1.41375e+08	254795	3.65337e+06	1.71204e+06	79353.5	175200	792211	267814	5.80621e+06	1.14478e+06	857556	1.22335e+06	1.61604e+06	836847	705178	374390	6131.84	108423	542725	872.922	1.2922e+06	2785.86	255186	30317.5	86529.1	556781	133086	4.46214	1.5337e+07	4.47966e+07	4.42303e+07	1.95442e+06	1.3844e+07	2.54777e+07	1.18773e+07	2.02194e+08
CLA224_G	3745.18	8.57453e+06	1.14415e+08	8.73014e+08	2.94084e+09	1.38849e+08	2.6872e+08	811217	7.75095e+07	44484	2.99096e+07	1.94039e+07	3.44026e+07	2.77295e+07	26037.3	526347	63984.3	652582	204344	209624	116764	463279	2075.74	142107	553770	199387	15681.5	83171.7	283583	2236.18	89481.8	71063.2	306159	293364	28768.9	207195	1994.65	206867	158216	6796.65	6902.99	291932	1.50198e+06	726196	7.41623e+06	1.84256e+06	1.8231e+06	645374	915408
CLA225_G	766223	2.05529e+07	9.82938e+08	2.30542e+08	1.42455e+08	1.91388e+07	8.95743e+08	1.90197e+09	6.64568e+08	3.11324e+07	1.39027e+06	4.9885e+07	1.49239e+07	2.28385e+07	6157.27	14640.8	246791	906078	85501.9	27976.9	10729.4	147114	317437	17850.8	70274.2	4174.4	313672	212.287	22074.6	5035.57	252002	15270.7	302590	9079.35	14493.5	9099.01	25325.1	75968.7	4712.47	109748	76937.6	577649	639218	9.72905e+06	5.54658e+06	226172	142562	86025.2	7.75067e+06
CLA209_H	34584	546621	1.25522e+06	51930.2	437977	28152.7	823847	1.10571e+06	350799	422680	311194	70599.7	465.128	10309.8	137271	865623	417082	214965	2.35726	35962.1	9879.48	590805	346450	312462	124931	416697	872991	37866.6	494831	3781.28	716325	615531	309895	1.14666e+06	4640.69	132632	115808	1494.94	1.32589e+06	1.43675e+06	35289.8	705558	763069	700434	34590.7	12252.8	36484.6	46234.8	899326
CLA102_J	82737.7	2.88217e+06	2.33681e+06	1.07493e+07	8.69102e+06	1.79541e+06	1.84934e+06	71139.9	1.91668e+06	272194	5.04675e+06	1.03489e+07	3.04136e+07	1.43835e+08	2.78317e+07	1.63659e+09	1.47287e+09	3.2384e+09	2.37771e+09	2.08575e+10	2.52462e+08	7.59814e+09	4.89369e+06	1.08183e+08	6.7471e+08	9.89336e+08	8.45401e+06	6.21772e+07	2.9682e+07	8486.98	1.87201e+07	1.77539e+07	1.15637e+08	1.66896e+08	6.83165e+06	7.26266e+07	100466	1.78641e+07	1.79963e+07	318649	1.25002e+07	4.74804e+08	4.5331e+08	5.84276e+07	2.25231e+08	2.57e+07	8.80942e+07	7.01563e+06	2.93847e+07
CLA200_K	23743.6	75065.2	6055.43	171694	59333.2	913.254	13430.2	30668.1	48851.3	9681.44	212.849	167222	322157	127336	3.04082e+06	1.24907e+07	1.31342e+07	370392	332220	167858	647215	6.17327e+06	4.34147e+06	2.16391e+07	7.45583e+06	2.35138e+06	2.7335e+06	53911.6	1.04275e+10	1.43373e+09	7.26319e+06	6.74144e+07	5.40409e+07	1.53614e+06	2.71873e+07	5.27497e+08	7.32603e+08	1.68489e+09	6.84867e+07	2.81055e+09	1.25248e+08	34990.8	133463	305531	344072	64791.9	23027.8	53422.3	131208
CLA201_K	33370	126733	13188.4	177710	51169.3	11506.3	25376.1	24428.1	17584.9	2698.37	3925.51	566203	335515	691011	1.40299e+06	7.59812e+06	1.67051e+07	27066.5	155603	50291.3	443258	6.90604e+06	4.53286e+06	1.06913e+07	2.75218e+06	4.14891e+06	5.93856e+06	30343.3	3.23515e+08	3.76756e+08	1.91529e+07	2.76573e+07	4.02496e+06	1.77568e+06	3.68634e+06	1.3532e+08	8.26403e+07	4.70237e+07	2.35194e+06	3.95314e+08	7.8975e+07	71283.3	164358	1.04457e+06	197807	67372.8	13710.4	69684	324267
CLA202_K	74094.2	539936	15069.2	6250.61	127679	74187.3	93067.9	211006	24681.2	140475	241318	579711	27626.3	1.37466e+06	415302	1.267e+06	1.07282e+07	708362	35211.8	991124	39902.8	732427	2.46452e+06	2.60943e+06	1.1766e+06	7.07846e+07	493996	131221	1.09264e+08	3.45757e+09	1.10734e+08	15375.2	3.07329e+06	1.48513e+09	4.49564e+06	1.84949e+08	4.12403e+08	463951	4.23891e+10	5.86288e+09	2.74723e+08	1.16418e+06	715950	332382	204.203	686.179	76834.9	74.3155	56178.7
CLA203_K	1590.9	12539.1	527733	42943	8397.7	13080.5	44469.9	127057	195310	100909	779.981	364022	65855.3	667609	494436	793271	3.61815e+06	4.03355e+06	174851	102412	2258.44	1.14689e+06	2.73792e+06	1.43901e+06	381788	454929	1.4911e+07	1754.58	6.44111e+06	3.47564e+07	8.43223e+07	5.70322e+06	4.96741e+07	4.13295e+06	1.30596e+06	427979	3.06124e+07	5.27584e+07	2.2734e+07	6.52273e+08	1.95707e+07	426024	189778	1.4042e+06	343011	3291	7320.06	9765.56	450244
CLA306_L	80868.1	651675	1.48566e+06	460755	31716.2	1756.95	163511	1.21099e+06	813644	374523	92208.3	7.54657	596868	11274.2	976.909	29971.4	174574	753158	101031	14692.6	62960.1	74203	3071.31	116748	263584	309586	531556	309.899	2.67138e+06	2.16488e+06	873452	6160.3	2.25899e+06	116285	270963	1.99349e+06	375748	1.78045e+06	104596	308827	618833	298793	142588	249653	646404	38930.8	5596.65	1928.07	227951
CLA307_L	9497.99	11898.6	1.97252e+06	1.22697e+06	843288	138637	3523.47	440274	907738	123291	52120.3	573016	869515	1.6502e+06	13565.3	446352	9869.13	1.6847e+06	248152	227242	94386.8	82097.2	109574	105548	895805	243633	728108	19961.3	3.7748e+06	26401.6	2.01798e+06	61096.7	3.69014e+06	1.40993e+06	263757	1.4482e+06	9040.99	2.63952e+06	1.3363e+06	1.11025e+06	178457	13363.6	20347.8	931525	1.18447e+06	104816	122927	12571.6	96190.5
CLA308_L	80561.6	448722	887050	1.21003e+06	419623	499.742	5.11425	751430	697606	181776	8372.01	70947.2	1.22032e+06	424.714	53738.4	887822	1.46104e+06	798201	216991	99832.7	184740	1.0436e+06	152995	802493	914365	165203	98253.8	11011.8	6.94025e+06	4.57651e+06	384046	482150	2.84698e+06	62524.3	423893	5.2361e+06	1.23204e+06	3.01936e+06	92050.8	36105.4	1.91444e+06	32850.9	5799.44	2708.85	1.06279e+06	134474	57981.1	44744.2	7.19582
CLA200_O	61477.1	922848	575046	361489	1.12565e+06	159507	913210	973257	111024	449015	629392	42280.7	59773.1	462886	477984	3.37297e+06	429716	1953.64	61108.5	423391	59420.7	1.37625e+06	324863	835374	1.13455e+06	3.74018e+06	1.35835e+06	136100	4.89021e+06	886659	291957	2.53339e+06	6458.38	1.46145e+07	5650.73	863021	5045.49	1.0104e+06	1.65945e+07	1.72713e+06	321532	1.57726e+06	1.75993e+06	353134	29072.9	66926.2	200324	82508.9	1.19097e+06
CLA203_O	103609	972522	513437	3943.71	247599	74435.9	402745	801499	236942	442124	405618	137206	55301.7	434806	617272	2.45739e+06	256838	245746	501.437	255252	2268.08	164241	25670	54778.6	335824	9.81051e+06	2.6174e+06	112450	10482.8	5.38529e+07	1.47861e+06	2.07467e+06	3.00875e+06	4.39477e+07	646707	4.32765e+06	6.21306e+06	662397	1.05094e+08	2.27979e+06	1.25793e+07	1.85089e+06	1.39906e+06	115710	77445	2102.21	66247.2	16525	655221
CLA204_O	12315.4	263754	13628.8	508180	749119	122890	269063	88980.9	31729.2	52500.9	284663	233011	263124	965631	332275	2.84065e+06	44971.3	827343	226622	539089	108337	698575	5243.27	658929	1.97645e+06	3.28098e+06	12.4921	100585	1.68454e+07	933455	1.53889e+06	1.82871e+06	4.12414e+06	1.88881e+07	258358	2.95021e+06	59207.3	7.23551e+06	2.87039e+07	413382	1.10828e+06	501435	730926	34433.5	395656	81922	171656	41471.9	199120
CHL601_X	5444.67	15998.4	36438.7	18156.7	37480.7	11033.9	45254.7	29478	7038.66	19865.5	18960.4	8789.58	6563.98	1236.68	264516	188068	107883	8371.6	14487.8	65283.6	50133	121515	76265.9	123105	63761.5	41572.2	140924	54016.1	548982	58911.6	133569	272680	3943.13	234824	24833.5	189349	140382	106034	486230	751912	54654.6	63732.2	69190.2	54480.1	793.087	30019.5	39784.4	53519.1	67349.1
CLA602_X	4340.49	45714.8	148980	1249.64	8765.47	179.188	54764.2	95201	66110.5	57513.6	21685.8	21016.5	9710.84	18135.1	34312.5	126913	83645.4	164348	4094.16	544.506	18.9733	84101.5	117548	68845.5	1249.16	66900.2	474150	4776.19	8372.12	4724.95	884449	270519	557360	191175	22490.5	116.597	83357.6	199788	441209	2.52552e+06	27535.5	119900	89428.4	134135	34169.4	19.321	837.668	3868.32	111623
CLA603_X	4856.61	70472.2	47500	33851.3	88848.1	9088.73	88069.6	72239.7	11752.2	48461.8	61891.5	413.857	7747.04	17730.4	89872.5	494003	82602.4	1706.39	7021.02	37712.4	10248.9	188117	81561.5	217379	214193	403302	280110	20783.4	1.69255e+06	43847.9	137449	818816	186.408	1.80343e+06	3231.2	258665	40843.9	514137	4.7115e+06	1.42296e+06	5994.35	182059	181412	45052.6	3154.07	6986.71	15676.4	10352.6	117503
CLA604_X	4381.61	33194	60.7852	76.6953	5969.03	6113.15	3335.33	12991.1	1125.36	5587.85	14326.2	55076.5	4810.97	79464.6	302.261	1815.81	154991	13771.2	65.2696	5155.74	2419.24	39526.9	66995	60382.6	249.765	218275	27490.3	874.177	180124	1.14163e+06	195683	37127	5240.45	399759	12514.5	302292	735677	13405	915588	1.25277e+06	589776	8726.26	6036.77	29905.7	175.584	124.309	1489.98	401.323	317.554
CHL605_X	1484.45	514.004	18105.3	10453.2	4705.04	7137.81	190.392	5069.86	12104.6	3192.76	165.924	8096.52	11261.7	16902.3	32.8375	4300.34	2915.12	77292.6	60047.9	38986.6	17274.2	9.71938	10904.7	1133.56	37439.4	6114.52	78597.5	2349.29	249180	111.798	346924	206.597	361842	56487.7	178016	58156.2	8553.35	543338	155973	683051	13113.2	2140.78	114.806	18288.5	22923.6	10311.1	10240.9	292.057	3854.35
CHL606_X	3696.04	1857.46	12353.7	413.445	29.7046	11149	2169.76	450.763	2092.32	899.719	256.199	33655.5	1183.97	40083.1	75234.7	40354.9	142325	35505.2	974.146	3286.23	18771.3	66963.1	90274.8	89700	3210.79	33958.4	134653	1758.33	244684	553806	404009	168718	63907	31900.9	20256.4	215603	543935	2675.79	68716.5	2.28004e+06	339717	4737.52	4432.18	50047.9	730.066	2901.97	121.9	13101.9	16214.2
CHL607_X	271.958	476.695	27726.2	6492.26	4769.45	22175.8	528.054	3238.73	12012.1	2564.44	1126.99	34195.4	4746.36	55985.7	12805.2	889.953	67323.8	109587	51822.1	51853.9	1415.89	17091.2	60327.5	16156.5	20376.7	45741.5	172121	1313.59	34837.8	219722	695569	34127.3	407997	153671	65956.8	3514.98	255235	340523	394233	2.37535e+06	210436	2970.2	633.507	54687.2	19432.2	3862.25	11864.7	1498.35	11705.2
CHL608_X	0.290648	644.278	22465.3	1692.45	3322.9	1221.04	10337.5	6797.22	5468.2	6145.62	1552.71	21780.7	984.74	19773.8	151662	85066.4	121916	32691.5	4.72468	2410.47	22580.8	81614.6	91875.5	104475	14137.4	154.761	168514	13589	326999	253742	357949	231261	62306.6	12114.1	8036.85	175339	375257	10926.9	40187.1	1.86085e+06	189858	22385	20435.2	54144	754.668	6237.84	2942.43	22318.2	31753.3
CHL609_X	21359.3	28478.5	56395.2	398.531	12028.1	6640.31	31992.2	44359	23504.8	29850.7	17146.4	4152.5	1228.75	1230.49	271228	133027	47849.5	60995.6	3012.52	27316.6	4476.49	64963.1	67713.5	67686.5	15643.5	97036.2	300282	43595.9	117640	15946.6	502909	308717	236209	356533	65240.2	10563	46705	24258.9	1.00488e+06	2.11371e+06	3817.49	83530.4	65833.8	56230.2	7923.48	3218.06	15278.7	24539.8	62222.6
CLA610_X	5217.52	59730	49943	5646.27	37714.7	4894.7	55832.9	66470.8	21250.3	42150.9	40437.3	581.103	69.166	8298.45	33859.2	166840	13696.7	15262.2	326.375	11882	1190.77	54854.3	31256.4	53362.6	48660.5	215894	169453	9424.09	181868	132711	129137	257121	49286.6	653259	2875.23	5316.18	1047.28	12296.1	1.52092e+06	519192	29431	110027	97916.4	28884.4	1438.3	1414.99	5875.98	4002.17	68818.3
CLA611_X	2654.67	35484.5	88010	2647.56	24385	993.314	57172.9	66704.8	32899.3	41452	24999.8	11464	160.551	4427.33	30280.5	147266	77418.2	53805.7	59.7069	3758.01	1604.32	92634.1	84618.7	84860.4	23027.1	62066.3	247501	6077.39	154396	1480.55	328208	248309	122806	217649	1725.16	39628.7	75576.6	234.008	449460	1.07467e+06	21836	92646.8	82806.4	83825.4	6185.32	1096.56	2823.26	5208.16	90108.8
CLA612_X	349.173	6455.9	65532.5	225.278	4796.82	147.494	24983	27779.9	22608.1	19574.7	5244.42	33688.2	127.1	31517.7	20225.3	89534	122652	74942.8	673.264	136.148	1380.15	88663	108463	89145.9	6097.95	1936.31	248311	2270.05	120160	111233	474456	212183	167499	24253.4	753.424	74887.7	231289	9837.95	59236.3	1.62805e+06	135424	45504.6	38133.3	95136.3	8105.68	427.208	374.944	3590.86	60974.6
CLA613_X	10136.8	89525.7	43312.8	1392.36	16576.4	7769.61	35538.3	86057.7	32680.4	41922.8	39599.2	23385.6	16937.1	40498.5	4507.27	14671.3	40036.5	13334.6	884.898	4809.49	1844.43	1283.96	2343.34	5986.01	327.677	245022	41215.6	3338.18	84386.2	679163	14766.5	9260.81	93652.3	440219	23426.8	180360	229812	82785.7	808851	1072.69	279988	64666.9	48257.8	900.914	14389.4	122.378	2486.35	146.808	24837.2
CLA614_X	819.366	675.093	25581.3	75852.8	48559.8	3114.41	4969.78	6899.53	30014.4	2122.81	4422.96	2539.06	66442.8	20897	12266.3	129984	41520.6	114933	24377.1	20721	16376.5	65782	4534.94	97007.8	179831	15795.8	15868	4233.07	1.45083e+06	168611	183814	155101	575065	242480	64644	530804	85933.5	1.19904e+06	537592	18133.7	23019.6	1842.43	11742	3734.91	78539.2	9882.73	8407.8	3646.38	1491.12
CHL601_Y	192984	204273	253910	9677.31	19890	55361.3	96359.8	249645	129304	130269	71550.1	1381.9	53467.9	6897.73	492467	167464	4876.9	280289	115758	51869.3	47122.5	20479.4	39333.8	2042.19	1242.52	809177	816005	93030.5	842007	3.41351e+06	1.30805e+06	236614	1.83512e+06	2.19311e+06	1.65231e+06	896246	371140	1.36227e+06	5.12929e+06	2.37277e+06	615003	319887	215465	106997	90266	5174.93	27395.5	17751.3	169144
CLA602_Y	30169.3	240840	46078.9	10927.2	19824.3	23098.1	42511.1	167699	53159.6	72100.3	79215.2	148581	60913.4	228634	544.106	514.38	576632	5453.82	3712.16	12958.1	17678.5	119385	123610	191290	6198.09	1.05307e+06	4772.22	4904.23	2.0288e+06	7.11528e+06	44204.5	36705.2	236541	2.0256e+06	149637	2.13471e+06	2.66659e+06	640249	4.20443e+06	1.31989e+06	2.85995e+06	120413	76160.6	25754.5	35157	2160.89	4288.3	725.523	13226.5
CLA603_Y	13839.6	97794.9	193098	59499.6	1834.28	364.405	28785.2	154432	128806	73843.7	19565.2	72.915	102481	1948.36	1934.29	2079.1	33395.5	286429	30312.4	3041.64	17172.6	10057	4478.96	36958.3	96148.2	152395	330239	386.737	1.85104e+06	1.28371e+06	790757	9.61577	1.51106e+06	112514	166915	992945	264440	1.88894e+06	211001	696937	238625	91411.7	41230.5	57860.7	140581	6550.11	595.203	109.361	52930.9
CLA604_Y	1854.55	58061.3	11824.1	168512	247064	21107.5	134644	48483.5	476.429	31472.9	85487.2	2000.49	80893.6	54362.6	86230.8	646716	167830	37324.1	32386.8	71313.2	30191.2	315596	77834.3	302803	390216	311879	98079.7	25684	2.53275e+06	35241.3	98.6377	695425	249030	1.64944e+06	41851.6	751528	111588	1.09559e+06	2.91172e+06	358313	7534.23	156506	213607	27977.8	66150.8	24058.4	35988.9	19812	130565
CHL605_Y	17942	20508.5	17291.2	4854.66	16146.2	86746.9	1122.23	1811.38	3666.2	275.358	12129.4	83114.3	170.743	127917	2305	159.502	100351	50943.7	20858.4	59807.8	1266.92	23590.1	51855.2	20305	7756.2	103182	55780.2	5366.17	2465.01	341398	205451	12588.1	79760.3	197549	97.541	48421.6	205714	27345.8	296470	517086	272242	869.482	1700.3	60349.9	7724.11	1203.18	23936.3	2168.61	5041.31
CHL606_Y	54489.6	86554.1	38908	24191.8	89292.1	112402	82020.6	84837.2	12219.8	43691.1	63057.2	9764.98	1913.98	44290.5	250439	187774	5640.63	10.2298	27188.2	199498	22315.8	56169	12876.2	44754	80672.1	281956	79774.2	92740.6	271459	158289	11422.6	193066	75.4029	889921	16.6556	16905.8	9105.4	84255.8	1.56651e+06	97651.4	66955.1	112496	118243	12551.2	1090.92	31281.7	105047	43276.7	72032.4
CHL607_Y	56145.8	74477.9	5094.5	12913.8	57071.5	128105	38040.5	46866.6	2939.32	22851.9	47883.7	48175.2	203.494	108757	96218.4	75889.3	30521.4	13647.2	29973.8	199648	2725.56	2208.35	5581.76	981.889	54515.3	371596	3152.63	60867.7	69964.6	651673	52625.7	52012.4	23984.6	1.0696e+06	5200.95	17180.6	205198	77039.5	2.04834e+06	126586	347515	62058.3	63532.5	4037.26	2475.99	13277.2	82753.6	9751.15	18713.2
CHL608_Y	109102	133100	93414.2	17.1234	36794.8	86027.7	74433.1	147930	51667.3	67442.5	60346	13481.8	12821.7	33602.1	119624	63211.4	8921.9	24110.1	3943.58	67027.3	3854.66	5416.74	1971.17	814.161	6299.39	277047	99383.9	51653.1	11237.4	564316	59439.9	52025.7	111805	578647	160209	92911.1	113291	41076.3	978369	58431.5	207997	115129	96794.4	14318.3	14626.8	224.908	39606.1	11674.4	64156.5
CHL609_Y	88128.8	84985.9	51940.9	11639.7	3223.24	39743.6	22102.8	86243.8	42541.2	38046.9	26522.6	20360.5	34681.1	27813.1	7646.14	73.1619	77736.4	30952.5	36189.4	7439.81	49259.4	14944.9	7162.69	29796.1	8693.96	203192	38225	10425.2	442262	1.03407e+06	32116.7	859.96	214719	294469	396843	426854	350403	301829	534984	6231.94	385595	49735.9	30078.9	607.531	31338.6	11582.5	4051.16	558.922	15766.3
CLA610_Y	22066.3	145076	229675	143169	17754.9	589.395	17424.8	213576	182229	81915	18139.3	7015.95	196286	521.113	1668.49	70439.1	191111	258006	43103	8103.89	35794.6	100772	9321.62	153931	186210	146513	142726	97.3204	2.88415e+06	1.9406e+06	357623	60923.6	1.28338e+06	36508.5	193029	1.65089e+06	577101	1.83243e+06	43106.6	34078.5	569582	59954.7	16569.3	19628.4	207342	16233.3	3025.96	2974.48	22586.6
CLA611_Y	58785.8	463078	399705	88033	5851.68	17401.4	110140	505486	267539	214349	116632	63263.9	225403	86636.4	7342.07	45.3338	480145	351633	45419.7	1125.84	45698.1	92047.1	17797.4	187022	106371	1.28716e+06	442875	5607.05	5.29935e+06	9.31785e+06	596260	3537.48	2.44417e+06	2.01203e+06	427412	4.01978e+06	2.12365e+06	2.92707e+06	3.41787e+06	36854.7	2.83499e+06	338618	190251	27852.2	244607	11284.8	858.17	403.98	122032
CLA612_Y	51052.4	504838	146196	1397.49	151987	60514.8	192457	414950	91901.8	175083	217332	188219	32545.6	395688	37734.4	180436	282866	4114.8	17.4429	59350.2	3065.23	1845.65	25152.5	13152.5	43486.5	1.72708e+06	106775	23257.8	113108	5.26597e+06	1239.49	75461.7	116692	4.15101e+06	71421.5	801416	1.31847e+06	46984.8	6.8167e+06	149085	2.32036e+06	366570	315252	903.172	17509.2	212.468	25775.6	1839.51	124404
CLA613_Y	942.262	2611.14	200823	123.846	14.9611	11883.8	27900	25025.7	46410	21524.8	206.899	290177	63.3585	405573	75499.6	309274	1.21133e+06	468224	7265.69	6998.07	8274.49	528619	661829	514112	2149.68	197303	1.40254e+06	1590.01	1.03854e+06	4.11681e+06	3.92188e+06	1.01373e+06	1.23683e+06	265145	63.7649	1.15408e+06	2.87996e+06	95280.6	471647	1.70448e+07	2.76576e+06	72200.1	56387.9	535517	32825.5	813.525	486.299	10959.1	182790
CLA614_Y	6798.56	9173.19	31103.3	328220	207459	5166.43	42526.1	16020.3	74084.3	1984.47	14878.8	16990.7	330665	3335.33	193393	1.62744e+06	1.25424e+06	350635	142660	135172	136841	1.08017e+06	287547	1.31057e+06	1.24792e+06	16849	27351.9	28747.8	2.15689e+07	6.35464e+06	154137	2.36076e+06	3.44256e+06	2.1305e+06	558223	8.53559e+06	2.61364e+06	8.96315e+06	4.92159e+06	2.02849e+06	1.72936e+06	44750.5	129810	29855.1	329257	59231.1	44350.2	32956.2	74171.1
CHL601_Z	23711.1	13081.8	432.399	16004.7	3387.21	5585.74	490.985	6058.87	5279.55	1917.72	984.851	25073.9	26143.4	21815.1	147807	121465	261975	2627.77	51636.2	9571.99	125107	138078	103900	247077	83365.4	74126.3	33863.9	6519.52	2.82765e+06	2.1002e+06	72400.8	371050	148073	18418.9	729036	1.32001e+06	1.56077e+06	1.28021e+06	33889.8	2.38305e+06	775542	22.0056	2065.01	22299.8	17177.8	29869.1	4557.67	25812.5	6448.06
CLA602_Z	120.944	14776.9	13277.6	82930.3	97506.6	4417.75	65555.2	16988.9	67.6228	17096.4	34633	6692.16	58601.4	1418.7	182949	1.0657e+06	477285	10787.5	30423.6	56857.4	46030.5	529685	250487	795879	586270	196836	335297	26916.7	1.13963e+07	1.04926e+06	145671	2.07322e+06	336766	2.08594e+06	137730	2.75989e+06	1.46546e+06	4.41028e+06	7.08779e+06	5.46453e+06	381444	147222	178050	69134.7	43159.9	17807.3	19720.8	18732	119111
CLA603_Z	7774.48	40708.1	14341.7	15283.5	740.539	7964.51	2704.51	5449.44	185.502	513.261	6393.12	173079	34388.7	212501	58203.4	316721	1.17302e+06	58014	1891.79	741.357	28922.7	501011	508971	716294	75970.3	427681	480053	756.126	5.80452e+06	8.80586e+06	1.63684e+06	1.09321e+06	9487.55	476431	112866	3.52917e+06	5.44497e+06	828740	1.17922e+06	1.62858e+07	3.75307e+06	3114.61	8115.26	209847	5189.04	5145.74	0.113362	9201.88	50329
CLA604_Z	4339.02	30940.1	253265	32132	2189.48	2058.4	30169.8	99381.7	117961	67983.9	5708.83	82938.9	57798.4	143550	66369.2	91693.7	300085	1.17804e+06	62853.2	18392.1	6374.2	126322	429050	97323.2	140742	7460.88	3.07862e+06	1264.52	2.54285e+06	15985.6	1.32554e+07	884699	9.62206e+06	10012	382511	355707	973438	1.05727e+07	39875	7.81322e+07	576132	178601	83589.1	369173	177644	3000.44	1706.46	2000.43	160897
CHL605_Z	70384	34078.2	30857.1	84895.3	27717.2	27.7224	876.003	32537.3	45795	12962.3	382.576	17851	124745	4757.1	694382	680527	803125	208532	532502	245667	636331	483387	174549	939394	646298	118875	3480.23	46147.9	3.87985e+07	1.36317e+07	235066	1.42398e+06	3.54491e+06	95586.7	6.5455e+06	1.01697e+07	5.858e+06	1.57616e+07	627458	3.20384e+06	2.85539e+06	876.186	7048.63	6402.24	138668	151551	59501	77237.1	4575.57
CHL606_Z	45637.2	22573.3	94733.7	85387.6	28919.5	10063	368.178	46837.7	73238.4	23463.4	74.4237	2744.88	118110	24040.6	128159	249823	125104	562784	679526	374304	398570	120831	384.63	281292	544986	9081.98	423834	26047.1	1.77874e+07	3.79381e+06	2.79358e+06	391869	6.03008e+06	454216	4.82372e+06	4.81874e+06	886830	1.32855e+07	2.04004e+06	2.75128e+06	359630	15712.2	9.24901	36294.4	186114	126160	74110.9	24905.1	6852.06
CHL607_Z	137.338	6495.76	13567.4	86058.6	81379.6	77123.1	18912.1	41.6894	17799.7	362.92	21508.7	15691.3	68697.9	77057.4	533027	507321	49712.6	256470	468664	677810	264067	153207	5169.07	250173	548965	326989	16492.6	129221	8.45773e+06	67054.6	851544	816210	2.16586e+06	3.244e+06	1.49076e+06	1.69454e+06	60338.5	5.96784e+06	1.07107e+07	299354	8930.82	33525.2	62756.8	6465.36	102991	127428	174004	54682.7	12579.8
CHL608_Z	26131.8	61169.3	108.803	112449	157987	182150	69162.8	25637.5	2836.86	20951	74991.6	30787.1	70445.9	167502	2.8308e+06	2.01631e+06	125026	321001	892849	2.24179e+06	511163	494410	45432.3	783500	1.50119e+06	2.42494e+06	94561.5	454941	3.48875e+07	422928	1.15369e+06	4.64831e+06	4.39384e+06	2.74317e+07	2.51439e+06	4.46678e+06	15086.1	1.79719e+07	1.23236e+08	118415	360004	255052	293184	121.184	110936	218605	428317	136071	93964.2
CHL609_Z	16081	1652.83	3340.73	74086.5	50900.3	829.67	26879.5	16.0415	3986.63	1309.81	5239.96	43258.3	78385.2	19532.6	1.3022e+06	965302	958997	7227.22	249348	251482	476498	672497	366909	975875	485090	438.765	313300	113733	1.70725e+07	5.93282e+06	318475	1.97719e+06	479675	600770	2.09921e+06	5.38044e+06	3.74639e+06	4.86827e+06	2.23724e+06	9.73146e+06	1.97087e+06	53597.7	84752.7	100896	52672.2	142141	86240.1	139543	81045.8
CLA610_Z	4627.39	16031.5	32770.8	21132.5	7168.84	3985.32	13893.3	5.80309	627.243	1508.67	348.046	164418	36099.5	185085	196547	907840	1.91844e+06	110368	4093.58	535.592	50416	922437	956860	1.61837e+06	230615	336980	1.30357e+06	5547.41	2.2946e+07	1.90007e+07	4.57546e+06	3.40538e+06	61565.1	133433	238416	8.41128e+06	1.49539e+07	3.18904e+06	332293	6.6327e+07	6.84283e+06	40054.5	49656.7	304113	4912.02	8061.27	869.525	15611.7	108637
CLA611_Z	2643.08	6367	1586.53	40730.3	20311.7	159.654	10729.5	793.914	3319.03	32.6764	509.147	45370.9	52925.7	30597.6	103333	587304	736566	1070.38	17734.6	11158.8	43043.7	466513	347178	877084	339943	38352.6	269611	7335.3	1.19734e+07	5.38863e+06	470529	1.9154e+06	305706	82361.6	237038	4.18565e+06	4.9653e+06	5.10294e+06	477364	1.35176e+07	1.88518e+06	20877	36646.3	78311.9	33044.8	10327.2	4065.45	10853.3	44837.2
CLA612_Z	3080.02	5987.6	10655.3	86505.2	45702.5	727.457	8504.55	7300.19	26186.6	1889.51	2509.36	6943.8	106323	63.1098	118792	809252	565700	177506	62524.1	46866	69856.3	458689	173770	974726	790804	8.22628	9764.38	12717	2.63969e+07	5.84544e+06	167358	2.35533e+06	2.91037e+06	883170	598082	6.8738e+06	4.24148e+06	1.77245e+07	4.72873e+06	4.64319e+06	1.27246e+06	10721.6	36527.5	9108.02	119604	18955.4	11801	11263.6	18694.5
CLA613_Z	10193.9	104869	25190.4	13993.5	66945.5	14732.9	61037.9	74175.1	11605.8	47828.3	69738.2	32422.8	62.5996	93102.7	66925.3	329072	10619.3	2029.78	5354.61	52508	1616	37706.2	880.397	38217.2	175801	1.07997e+06	139069	20763.2	617820	2.06277e+06	1389.16	584091	1359.86	4.30443e+06	5421.7	12865.9	524973	348724	1.44652e+07	7278.72	715842	182723	158860	1536.15	533.929	2879.88	15700.3	3846.98	63964.6
CLA614_Z	949.286	12933.3	87308.3	79.3999	6154	53.1546	30836.5	38794	31381.5	31232.3	9059.19	40099.1	828.231	40184.8	72058.5	261200	288024	224357	2320.42	575.5	2420.47	203428	279673	269909	16347.6	21940.8	1.01391e+06	5813.65	528690	346771	2.78152e+06	1.17623e+06	960702	200665	8391.42	231510	1.00635e+06	136737	796210	1.79267e+07	386819	108553	78951.3	163646	17724.5	535.263	774.63	5507.56	103851
[truncated: 181 more columns]
